# Supplementary material for: Mechanistic insight into the aerobic oxidation of benzyl alcohol catalyzed by the CuII–TEMPO catalyst in alkaline water solution
Source: Royal Society of Chemistry journal article supplement (doi:10.1039/c5ra18083j), 2015-01-01
Supplement: c5ra18083j1.pdf [file c5ra18083j1.pdf]

**Supporting information**

**Mechanistic Insight into the Aerobic Oxidation of  
Benzylic Alcohol Catalyzed by the Cu<sup>II</sup>-TEMPO  
Catalyst in Alkaline Water Solution**

R. F. Duan,<sup>a</sup> L. Cheng,<sup>\*a</sup> Q. C. Zhang,<sup>a</sup> L. S. Ma,<sup>a</sup> H. Y. Ma,<sup>a</sup> J. C. Yang<sup>a</sup>

<sup>a</sup> Key Laboratory of Industrial Catalysis of the Inner Mongolia Autonomous Region,

Inner Mongolia University of Technology, Huhhot 010051, China.

Email: lcheng1983@aliyun.com

**Table S1** Cartesian coordinates all structures considered in this work (B3LYP level)

| <b>0</b>                   |             |             |             | <b>1</b>                   |             |             |             |
|----------------------------|-------------|-------------|-------------|----------------------------|-------------|-------------|-------------|
| Charge=-1 Multiplicity = 2 |             |             |             | Charge=-1 Multiplicity = 2 |             |             |             |
| Cu                         | 1.24806700  | 0.66643300  | 0.05856700  | Cu                         | -0.69336700 | 0.34941900  | 0.03333700  |
| C                          | 2.51561600  | -3.23360300 | -0.18526600 | O                          | 3.44571600  | 1.34015000  | 0.08007100  |
| N                          | 2.37759000  | -0.96045000 | 0.04449900  | C                          | -1.83317000 | 4.26766300  | 0.31402000  |
| C                          | 3.81264600  | -2.71332400 | -0.08697100 | N                          | -0.66112200 | 2.31632200  | 0.08868000  |
| H                          | 2.22661300  | -4.27134900 | -0.30040600 | C                          | -0.46673100 | 4.56618700  | 0.26706000  |
| C                          | 3.67252300  | -1.31022300 | 0.04880400  | H                          | -2.65839300 | 4.96212700  | 0.41437300  |
| H                          | 4.74442500  | -3.26448200 | -0.11105500 | C                          | 0.21559200  | 3.33075500  | 0.13190300  |
| H                          | 4.44670200  | -0.55854100 | 0.14192500  | H                          | -0.00685200 | 5.54448600  | 0.32491900  |
| C                          | 0.23646200  | -1.99551000 | -0.13933600 | H                          | 1.28217300  | 3.14580200  | 0.07341300  |
| H                          | -0.37033800 | -2.89452600 | -0.27797300 | C                          | -3.01004500 | 1.95531900  | 0.19251700  |
| N                          | -0.31136100 | -0.80780300 | -0.03571200 | H                          | -4.02718500 | 2.33901400  | 0.30036600  |
| C                          | -1.70799100 | -0.64139500 | -0.00905500 | N                          | -2.77570900 | 0.66502000  | 0.08267100  |
| C                          | -2.23157200 | 0.62047500  | -0.35679800 | C                          | -3.82593900 | -0.26798500 | -0.00031400 |
| C                          | -2.60512800 | -1.65864600 | 0.37860200  | C                          | -3.56457300 | -1.60279000 | 0.36843200  |
| C                          | -3.60860300 | 0.84145400  | -0.36754600 | C                          | -5.11649100 | 0.06098800  | -0.46459600 |
| C                          | -3.98508100 | -1.44342900 | 0.36769800  | C                          | -4.57247800 | -2.56544700 | 0.32295900  |
| C                          | -4.46102600 | -0.19722500 | -0.01563900 | C                          | -6.13077900 | -0.89804000 | -0.50933300 |
| H                          | -4.01531400 | 1.81119500  | -0.63514600 | C                          | -5.84053600 | -2.19361500 | -0.10495200 |
| H                          | -4.68018500 | -2.22060200 | 0.66915400  | H                          | -4.37467200 | -3.59386600 | 0.60652300  |
| C                          | 1.64525100  | -2.12208500 | -0.09856100 | H                          | -7.12428800 | -0.65200400 | -0.87022700 |
| H                          | -1.54146900 | 1.42610500  | -0.59002800 | C                          | -1.92674900 | 2.86021000  | 0.19982800  |
| H                          | -2.23152500 | -2.61920600 | 0.71819500  | H                          | -2.55716800 | -1.87743500 | 0.66407100  |
| F                          | -5.81575600 | 0.01726600  | -0.02407000 | H                          | -5.33150400 | 1.06263600  | -0.82220100 |
| O                          | 1.54382000  | 4.26192100  | 0.04175600  | F                          | 6.83309000  | -3.13733700 | -0.15164000 |
| C                          | 1.45769500  | 3.03457000  | 0.05392300  | O                          | 1.65124800  | -2.40380700 | 0.01683000  |
| O                          | 2.47897200  | 2.18910600  | 0.14953300  | C                          | 0.85105700  | -1.46938800 | 0.01677300  |
| O                          | 0.30978200  | 2.34908000  | -0.02843200 | O                          | 1.19146900  | -0.17714400 | -0.06124600 |
|                            |             |             |             | O                          | -0.47078200 | -1.57673500 | 0.08777300  |
|                            |             |             |             | H                          | 2.66161800  | 0.74370600  | 0.12687700  |
|                            |             |             |             | C                          | 4.30552500  | 0.85098400  | -0.93780900 |
|                            |             |             |             | H                          | 4.84269400  | 1.71323000  | -1.35425900 |
|                            |             |             |             | H                          | 3.71182700  | 0.40549100  | -1.74967300 |
|                            |             |             |             | C                          | 5.31789200  | -0.16864100 | -0.44087200 |
|                            |             |             |             | C                          | 4.89496300  | -1.43537300 | -0.00294800 |
|                            |             |             |             | C                          | 6.68472000  | 0.13603400  | -0.40799100 |
|                            |             |             |             | C                          | 5.82930800  | -2.36758700 | 0.45390400  |
|                            |             |             |             | H                          | 3.83669000  | -1.69551100 | -0.01812000 |
|                            |             |             |             | C                          | 7.62190900  | -0.79833100 | 0.04770300  |
|                            |             |             |             | H                          | 7.01925100  | 1.11745600  | -0.73938000 |
|                            |             |             |             | C                          | 7.19417700  | -2.05565800 | 0.48090200  |

|                            |                            |             |             |            |             |             |             |
|----------------------------|----------------------------|-------------|-------------|------------|-------------|-------------|-------------|
|                            | H                          | 5.48646700  | -3.34371000 | 0.78756300 |             |             |             |
|                            | H                          | 8.67901800  | -0.54276900 | 0.06675200 |             |             |             |
|                            | H                          | 7.91648600  | -2.78658500 | 0.83699000 |             |             |             |
| <b>TS1-2</b>               | <b>2</b>                   |             |             |            |             |             |             |
| Charge=-1 Multiplicity = 2 | Charge=-1 Multiplicity = 2 |             |             |            |             |             |             |
| Cu                         | 0.79356400                 | -1.08811100 | 0.27489600  | Cu         | 0.00690000  | 0.02652400  | -0.48451000 |
| O                          | -1.11999400                | -0.80360500 | -0.46768000 | O          | -1.75718600 | -0.69950400 | -0.15747100 |
| C                          | 4.32299900                 | -2.02644000 | -1.62775100 | C          | 0.02772800  | 4.13063100  | -0.72848900 |
| N                          | 2.31381800                 | -2.13895000 | -0.52959300 | N          | -0.53163800 | 1.91935400  | -0.60556600 |
| C                          | 3.98109300                 | -3.37153100 | -1.45446200 | C          | -1.35264500 | 4.00391200  | -0.94704000 |
| H                          | 5.20706900                 | -1.62541400 | -2.10818300 | H          | 0.61460300  | 5.04099100  | -0.71897200 |
| C                          | 2.73785200                 | -3.38594700 | -0.77133600 | C          | -1.64752700 | 2.62501900  | -0.86518900 |
| H                          | 4.54697700                 | -4.23889600 | -1.77036600 | H          | -2.06202000 | 4.79822800  | -1.14162500 |
| H                          | 2.15717800                 | -4.24219400 | -0.45042100 | H          | -2.60236600 | 2.12840300  | -0.98250600 |
| C                          | 3.03424700                 | 0.10067500  | -0.88403500 | C          | 1.79815900  | 2.28990500  | -0.26760400 |
| H                          | 3.77552400                 | 0.82538400  | -1.22903200 | H          | 2.64926000  | 2.97237500  | -0.18705700 |
| N                          | 1.93875100                 | 0.49790600  | -0.27653400 | N          | 1.95736100  | 0.99572300  | -0.15431900 |
| C                          | 1.64688800                 | 1.85886700  | -0.07987100 | C          | 3.21656700  | 0.47132500  | 0.20837200  |
| C                          | 0.95162400                 | 2.22927500  | 1.08770600  | C          | 3.60995000  | -0.78339000 | -0.29597100 |
| C                          | 2.00239300                 | 2.85637500  | -1.00755200 | C          | 4.08393400  | 1.15217000  | 1.08646700  |
| C                          | 0.65158900                 | 3.56784100  | 1.33763900  | C          | 4.85707500  | -1.31679400 | 0.02893800  |
| C                          | 1.70677800                 | 4.19926400  | -0.76086800 | C          | 5.33537800  | 0.62384800  | 1.41323100  |
| C                          | 1.04071800                 | 4.52824100  | 0.41160300  | C          | 5.70055300  | -0.59879900 | 0.86751100  |
| H                          | 0.12071000                 | 3.86436400  | 2.23620700  | H          | 5.16435400  | -2.28371600 | -0.35548800 |
| H                          | 1.96844600                 | 4.97585200  | -1.47225700 | H          | 6.00664600  | 1.13772400  | 2.09381800  |
| C                          | 3.26863200                 | -1.28193300 | -1.04652800 | C          | 0.50876300  | 2.82046800  | -0.52005000 |
| H                          | 0.66001600                 | 1.45377300  | 1.79093300  | H          | 2.90957000  | -1.33716400 | -0.91343600 |
| H                          | 2.48532700                 | 2.58188900  | -1.94020900 | H          | 3.77017000  | 2.08503500  | 1.54456900  |
| F                          | 0.74587500                 | 5.84401100  | 0.65409000  | F          | 6.92639700  | -1.12183300 | 1.18861200  |
| O                          | -1.03550100                | -2.27071900 | 3.37959900  | O          | 1.10070500  | -3.81932200 | -1.32798300 |
| C                          | -0.41840700                | -1.78981600 | 2.44110800  | C          | 0.38593900  | -2.87911800 | -0.98828100 |
| O                          | -0.47510900                | -2.47529300 | 1.16323100  | O          | -0.89831500 | -3.09597000 | -0.62520200 |
| O                          | 0.31887800                 | -0.75193600 | 2.35531500  | O          | 0.80926800  | -1.63340400 | -0.95324000 |
| H                          | -1.09778100                | -1.90689100 | 0.53273300  | H          | -1.33077100 | -2.21330000 | -0.40604000 |
| C                          | -1.90173300                | 0.34630300  | -0.30550700 | C          | -2.43110800 | -0.34823000 | 1.01292200  |
| H                          | -1.54509100                | 1.15654400  | -0.96616600 | H          | -2.12731400 | -0.99035000 | 1.86339900  |
| H                          | -1.84661600                | 0.73505700  | 0.72845800  | H          | -2.19566200 | 0.68786100  | 1.31548400  |
| C                          | -3.36135100                | 0.06803700  | -0.63263400 | C          | -3.94706500 | -0.45258700 | 0.87495300  |
| C                          | -4.18475700                | -0.58744700 | 0.29612200  | C          | -4.54123100 | -0.81446200 | -0.33886200 |
| C                          | -3.91068500                | 0.42462300  | -1.87121400 | C          | -4.77569500 | -0.18140500 | 1.97477700  |
| C                          | -5.51745500                | -0.87692300 | -0.00444600 | C          | -5.93352200 | -0.89954300 | -0.45249000 |
| H                          | -3.77185200                | -0.87570100 | 1.26002800  | H          | -3.89241700 | -1.02932200 | -1.18143000 |
| C                          | -5.24545700                | 0.14026300  | -2.17880200 | C          | -6.16501200 | -0.26299700 | 1.86487700  |
| H                          | -3.28129100                | 0.92728700  | -2.60232300 | H          | -4.32574700 | 0.09713400  | 2.92656500  |

|                            |             |             |             |                            |             |             |             |
|----------------------------|-------------|-------------|-------------|----------------------------|-------------|-------------|-------------|
| C                          | -6.05441700 | -0.51251800 | -1.24461500 | C                          | -6.75184600 | -0.62366500 | 0.64584700  |
| H                          | -6.13809800 | -1.38569600 | 0.72916400  | H                          | -6.37856600 | -1.18556900 | -1.40260600 |
| H                          | -5.65191200 | 0.42625900  | -3.14630400 | H                          | -6.79032100 | -0.04799500 | 2.72838100  |
| H                          | -7.09231000 | -0.73602200 | -1.47923100 | H                          | -7.83329600 | -0.69071500 | 0.55708200  |
| <b>3</b>                   |             |             |             | <b>TS3-4</b>               |             |             |             |
| Charge=-1 Multiplicity = 2 |             |             |             | Charge=-1 Multiplicity = 2 |             |             |             |
| Cu                         | 1.03380600  | 0.19976600  | -0.00055700 | Cu                         | 1.06113800  | 0.46524500  | 0.35012600  |
| O                          | 5.16973600  | 2.43899800  | 0.33110700  | O                          | 0.43487800  | 1.49164900  | 2.00868700  |
| C                          | 1.40078200  | -3.87701400 | -0.16564700 | C                          | 2.40665800  | -3.34530400 | -0.46278900 |
| N                          | 1.77776000  | -1.62658100 | 0.00229000  | N                          | 2.28364900  | -1.10568200 | 0.01400500  |
| C                          | 2.78168500  | -3.65762900 | -0.08909100 | C                          | 3.70525100  | -2.84462200 | -0.32225600 |
| H                          | 0.88618100  | -4.82635700 | -0.25089200 | H                          | 2.11089300  | -4.36264800 | -0.68844500 |
| C                          | 2.96222700  | -2.25614800 | 0.00968400  | C                          | 3.57372800  | -1.46218900 | -0.03238900 |
| H                          | 3.56643600  | -4.40325300 | -0.10327100 | H                          | 4.63434000  | -3.39242300 | -0.41831200 |
| H                          | 3.88672500  | -1.69642800 | 0.07923900  | H                          | 4.35752000  | -0.73289700 | 0.13269900  |
| C                          | -0.54057500 | -2.15424800 | -0.12906600 | C                          | 0.13821800  | -2.09762900 | -0.27424300 |
| H                          | -1.34189600 | -2.88970600 | -0.23492100 | H                          | -0.49725000 | -2.95187700 | -0.52150700 |
| N                          | -0.79976900 | -0.86871700 | -0.04827400 | N                          | -0.38150800 | -0.91465500 | -0.04222000 |
| C                          | -2.12263700 | -0.38931300 | -0.00064100 | C                          | -1.76477800 | -0.67931700 | -0.05659200 |
| C                          | -2.36670000 | 0.93879000  | -0.40294100 | C                          | -2.21656800 | 0.57799300  | -0.50503900 |
| C                          | -3.20786700 | -1.16343400 | 0.46009000  | C                          | -2.70899700 | -1.62876000 | 0.37711000  |
| C                          | -3.66084500 | 1.45881900  | -0.39479800 | C                          | -3.58038300 | 0.86493700  | -0.54866800 |
| C                          | -4.50614400 | -0.64898500 | 0.46805500  | C                          | -4.07686500 | -1.34730100 | 0.33292800  |
| C                          | -4.70886900 | 0.65242300  | 0.02996800  | C                          | -4.48494500 | -0.10569800 | -0.13405800 |
| H                          | -3.85259000 | 2.48095500  | -0.70420000 | H                          | -3.93990900 | 1.82623500  | -0.90088500 |
| H                          | -5.34450600 | -1.23807700 | 0.82582400  | H                          | -4.81389100 | -2.06771800 | 0.67284400  |
| C                          | 0.80120400  | -2.59753400 | -0.10404000 | C                          | 1.54295800  | -2.24488700 | -0.24708800 |
| H                          | -1.52648700 | 1.56136700  | -0.69357600 | H                          | -1.48085600 | 1.31099300  | -0.82792100 |
| H                          | -3.04270800 | -2.16518500 | 0.84307100  | H                          | -2.37455200 | -2.57977200 | 0.77978100  |
| F                          | -5.98144700 | 1.16087100  | 0.03986800  | F                          | -5.82616300 | 0.17494400  | -0.17422200 |
| O                          | 2.13852300  | 3.64080700  | -0.06079700 | O                          | 2.11857500  | 3.88512600  | -0.91628000 |
| C                          | 1.76166800  | 2.46939200  | -0.03745700 | C                          | 1.65877900  | 2.80387200  | -0.57185900 |
| O                          | 2.57140900  | 1.41419600  | 0.07607800  | O                          | 2.24357300  | 2.15208200  | 0.57462900  |
| O                          | 0.49799100  | 2.05848600  | -0.11830700 | O                          | 0.71683100  | 2.09536000  | -1.06543400 |
| H                          | 4.88315200  | 3.35976100  | 0.26730100  | H                          | 1.49934100  | 2.16133800  | 1.36905600  |
| H                          | 4.30755500  | 1.97233600  | 0.26130400  | H                          | -0.41736000 | 1.92423700  | 1.87140100  |
| <b>4</b>                   |             |             |             | <b>5</b>                   |             |             |             |
| Charge=-1 Multiplicity = 2 |             |             |             | Charge=-1 Multiplicity = 2 |             |             |             |
| Cu                         | 1.08081200  | -0.35415600 | -0.00309900 | Cu                         | -0.58089500 | 0.35642100  | -0.51599100 |
| O                          | 0.27216400  | -2.06635400 | -0.01990400 | O                          | 0.86518300  | 0.09990200  | -1.79308800 |
| C                          | 1.42429500  | 3.75523600  | -0.14887200 | C                          | -1.01883200 | 4.29438500  | 0.55550800  |
| N                          | 1.74925200  | 1.49553300  | -0.04145100 | N                          | -0.28491000 | 2.27942800  | -0.22891000 |
| C                          | 2.80019600  | 3.49831700  | -0.11266400 | C                          | 0.31266000  | 4.43319700  | 0.13641200  |
| H                          | 0.93214000  | 4.71907100  | -0.19915100 | H                          | -1.66087200 | 5.05683600  | 0.97929200  |

|                            |             |             |             |                            |             |             |             |
|----------------------------|-------------|-------------|-------------|----------------------------|-------------|-------------|-------------|
| C                          | 2.94969100  | 2.08954100  | -0.04939300 | C                          | 0.72244300  | 3.16562500  | -0.33443400 |
| H                          | 3.60293300  | 4.22466900  | -0.13093000 | H                          | 0.92075500  | 5.32813300  | 0.16936400  |
| H                          | 3.84956700  | 1.48884500  | -0.01364000 | H                          | 1.68949200  | 2.86392400  | -0.71700900 |
| C                          | -0.55325300 | 2.07017300  | -0.11366400 | C                          | -2.53293200 | 2.18417400  | 0.54635800  |
| H                          | -1.34916000 | 2.81774900  | -0.18630000 | H                          | -3.41121400 | 2.66863000  | 0.98162500  |
| N                          | -0.83203200 | 0.78674700  | -0.07435200 | N                          | -2.54174500 | 0.90636800  | 0.25645800  |
| C                          | -2.16530100 | 0.35096100  | -0.02747400 | C                          | -3.73615100 | 0.16357100  | 0.37933600  |
| C                          | -3.17604900 | 1.05578700  | 0.65931000  | C                          | -3.66676200 | -1.19537800 | 0.74091800  |
| C                          | -2.50805500 | -0.85642800 | -0.67018200 | C                          | -4.99913400 | 0.73403600  | 0.12257700  |
| C                          | -4.49553900 | 0.59619600  | 0.67018300  | C                          | -4.83120200 | -1.94866400 | 0.88895800  |
| C                          | -3.82256600 | -1.32243600 | -0.66127800 | C                          | -6.16916600 | -0.01440600 | 0.27283900  |
| C                          | -4.79440000 | -0.58280200 | 0.00214100  | C                          | -6.06028400 | -1.34171600 | 0.66346900  |
| H                          | -5.27590900 | 1.13102200  | 1.20214000  | H                          | -4.78295600 | -2.99709600 | 1.16356800  |
| H                          | -4.09282500 | -2.24878100 | -1.15783700 | H                          | -7.14531500 | 0.41449600  | 0.07057700  |
| C                          | 0.79344500  | 2.48902000  | -0.10067800 | C                          | -1.36195900 | 2.94619100  | 0.31765400  |
| H                          | -2.92528100 | 1.95500400  | 1.21332800  | H                          | -2.69034800 | -1.65113300 | 0.86821700  |
| H                          | -1.71717200 | -1.42530100 | -1.14795300 | H                          | -5.07096400 | 1.75896500  | -0.22791800 |
| F                          | -6.08691100 | -1.04016500 | 0.01362400  | F                          | -7.20560000 | -2.07991200 | 0.80793700  |
| O                          | 4.65037700  | -2.40281700 | 0.19027500  | O                          | -0.78951800 | -3.72115900 | -0.38475700 |
| C                          | 3.43855000  | -2.19591000 | 0.13048000  | C                          | -0.44189200 | -2.60385500 | -0.75661100 |
| O                          | 2.57671200  | -3.24190700 | 0.13986100  | O                          | 0.36116500  | -2.46951100 | -1.84054600 |
| O                          | 2.91947400  | -0.99159600 | 0.05476700  | O                          | -0.81409900 | -1.49616800 | -0.15400900 |
| H                          | 1.63442500  | -2.89188700 | 0.08955600  | H                          | 0.58837400  | -1.50409400 | -1.96388000 |
| H                          | -0.33648700 | -2.17889200 | 0.72122400  | O                          | 3.41421700  | 0.39307800  | -0.96116300 |
|                            |             |             |             | H                          | 0.75116600  | 0.71733800  | -2.52718500 |
|                            |             |             |             | C                          | 3.72986000  | -0.73858800 | -0.18100400 |
|                            |             |             |             | H                          | 3.07559400  | -0.80360600 | 0.70493900  |
|                            |             |             |             | H                          | 3.57224200  | -1.66856300 | -0.75127700 |
|                            |             |             |             | C                          | 5.16979300  | -0.69050100 | 0.28717300  |
|                            |             |             |             | C                          | 5.68167300  | -1.73204400 | 1.07682400  |
|                            |             |             |             | C                          | 6.01360900  | 0.37455000  | -0.04843300 |
|                            |             |             |             | C                          | 7.00429800  | -1.71074400 | 1.52200600  |
|                            |             |             |             | H                          | 5.03589900  | -2.56654300 | 1.34341100  |
|                            |             |             |             | C                          | 7.34020400  | 0.39818700  | 0.39680800  |
|                            |             |             |             | H                          | 5.61318200  | 1.17602000  | -0.65921000 |
|                            |             |             |             | C                          | 7.84220300  | -0.64173100 | 1.18297800  |
|                            |             |             |             | H                          | 7.38186200  | -2.52727700 | 2.13263500  |
|                            |             |             |             | H                          | 7.98242500  | 1.23354600  | 0.12762500  |
|                            |             |             |             | H                          | 8.87273400  | -0.62233800 | 1.52846500  |
|                            |             |             |             | H                          | 2.47472800  | 0.29831900  | -1.27127300 |
| <b>TS5-6</b>               |             |             |             | <b>6</b>                   |             |             |             |
| Charge=-1 Multiplicity = 2 |             |             |             | Charge=-1 Multiplicity = 2 |             |             |             |
| Cu                         | -0.10049500 | 0.34632500  | 0.45963400  | Cu                         | -0.27630400 | 0.34082800  | 0.48026900  |
| O                          | -0.49335900 | 0.00666600  | 2.75881600  | O                          | -0.98440800 | 0.25472800  | 3.51077000  |

|   |             |             |             |   |             |             |             |
|---|-------------|-------------|-------------|---|-------------|-------------|-------------|
| C | 0.13868300  | 4.37220700  | -0.29968200 | C | -0.10898000 | 4.34288400  | -0.47189700 |
| N | -0.50217500 | 2.26202300  | 0.29528300  | N | -0.68644900 | 2.25786500  | 0.25726000  |
| C | -1.18201500 | 4.41879400  | 0.17100700  | C | -1.40858500 | 4.39476500  | 0.05598000  |
| H | 0.74216100  | 5.19681400  | -0.65875400 | H | 0.46378900  | 5.15689200  | -0.89916800 |
| C | -1.53174700 | 3.09514200  | 0.52352100  | C | -1.72099400 | 3.08578000  | 0.48732100  |
| H | -1.81949400 | 5.29022900  | 0.25097200  | H | -2.05541600 | 5.26051900  | 0.12153200  |
| H | -2.46459700 | 2.71819100  | 0.92209000  | H | -2.63113400 | 2.71120300  | 0.93791500  |
| C | 1.73221800  | 2.33104900  | -0.51267500 | C | 1.50389000  | 2.31407600  | -0.66211800 |
| H | 2.58256800  | 2.88237700  | -0.92336000 | H | 2.31828800  | 2.85642900  | -1.14988300 |
| N | 1.80020200  | 1.03786500  | -0.31968600 | N | 1.60502300  | 1.03465400  | -0.40252500 |
| C | 3.01525200  | 0.35365500  | -0.53552200 | C | 2.81800400  | 0.35879600  | -0.65938800 |
| C | 2.98699400  | -0.95395600 | -1.05328400 | C | 2.78125600  | -0.99498700 | -1.03864400 |
| C | 4.26024300  | 0.93486000  | -0.22427900 | C | 4.07072300  | 0.99025600  | -0.52494500 |
| C | 4.17274900  | -1.64797600 | -1.29123200 | C | 3.95807900  | -1.68625400 | -1.32292800 |
| C | 5.45218900  | 0.24916800  | -0.46791200 | C | 5.25342600  | 0.30698200  | -0.81440700 |
| C | 5.38252800  | -1.02869600 | -1.00563600 | C | 5.17069900  | -1.01846300 | -1.21876400 |
| H | 4.15416800  | -2.66336800 | -1.67158500 | H | 3.93395100  | -2.73578200 | -1.59441000 |
| H | 6.41589900  | 0.68417300  | -0.22359500 | H | 6.22290800  | 0.78218900  | -0.70510100 |
| C | 0.53393900  | 3.02023600  | -0.20715300 | C | 0.31207800  | 3.00334400  | -0.32966100 |
| H | 2.02912000  | -1.42867000 | -1.23184800 | H | 1.82717500  | -1.50775500 | -1.06346100 |
| H | 4.29856100  | 1.91502300  | 0.24085700  | H | 4.12792800  | 2.01110800  | -0.16050700 |
| F | 6.55011800  | -1.70655300 | -1.23902900 | F | 6.33008100  | -1.69291600 | -1.49763000 |
| O | 1.19574300  | -3.49757200 | 0.50648500  | O | 1.61622300  | -3.15429200 | 1.31815600  |
| C | 0.77818700  | -2.43236400 | 0.95733000  | C | 0.98262400  | -2.12974100 | 1.55315400  |
| O | 0.86099000  | -2.18714400 | 2.28461100  | O | 0.99091900  | -1.63763400 | 2.82877000  |
| O | 0.24166400  | -1.49960700 | 0.20062800  | O | 0.29163800  | -1.47337300 | 0.65865200  |
| H | 0.39960100  | -1.33345700 | 2.53464400  | H | 0.32646500  | -0.92638900 | 2.96985100  |
| O | -2.15353200 | 0.00879300  | 1.06081300  | O | -2.08022500 | 0.02914100  | 1.15546800  |
| H | -0.37197600 | 0.74909800  | 3.36002000  | H | -0.76071100 | 1.18680000  | 3.62005100  |
| C | -2.82446700 | -1.21332900 | 0.84189000  | C | -2.72579500 | -1.19668200 | 0.95402400  |
| H | -2.12515200 | -1.97263000 | 0.46169600  | H | -2.00190800 | -2.02053800 | 0.85604400  |
| H | -3.22099400 | -1.59401700 | 1.79784300  | H | -3.34373100 | -1.42993000 | 1.84162300  |
| C | -3.97604900 | -1.07434000 | -0.13767600 | C | -3.64305100 | -1.22157100 | -0.26383600 |
| C | -4.78938500 | -2.18451200 | -0.41587500 | C | -4.30226400 | -2.40918600 | -0.61989000 |
| C | -4.24964000 | 0.13431400  | -0.78794000 | C | -3.85849800 | -0.08030600 | -1.04473100 |
| C | -5.85114400 | -2.08978300 | -1.31683500 | C | -5.15718700 | -2.45568000 | -1.72235300 |
| H | -4.58312100 | -3.13332700 | 0.07606400  | H | -4.13600100 | -3.30808100 | -0.02852900 |
| C | -5.31192000 | 0.23216400  | -1.69374000 | C | -4.71218700 | -0.12302200 | -2.15305400 |
| H | -3.61746500 | 0.98951800  | -0.57711000 | H | -3.34445100 | 0.83498400  | -0.77191900 |
| C | -6.11864800 | -0.87631500 | -1.96173600 | C | -5.36733200 | -1.30813800 | -2.49674700 |
| H | -6.46826000 | -2.96214400 | -1.51853400 | H | -5.65452800 | -3.38728000 | -1.98262500 |
| H | -5.50626200 | 1.17893800  | -2.19213900 | H | -4.86257800 | 0.77365200  | -2.74993200 |
| H | -6.94356200 | -0.79962500 | -2.66562200 | H | -6.02879800 | -1.34179000 | -3.35894400 |
| H | -1.54395700 | 0.00821200  | 2.02481400  | H | -1.53779500 | 0.20268500  | 2.66795800  |

|                           |             |             |             |                           |             |             |             |
|---------------------------|-------------|-------------|-------------|---------------------------|-------------|-------------|-------------|
| <b>7</b>                  |             |             |             | <b>7</b>                  |             |             |             |
| Charge=0 Multiplicity = 1 |             |             |             | Charge=0 Multiplicity = 3 |             |             |             |
| Cu                        | -0.09472000 | -1.15599800 | -1.39613200 | Cu                        | 0.09387200  | -1.16200700 | 1.39768000  |
| H                         | -2.60398500 | 5.02945500  | -0.31332400 | H                         | 2.62392700  | 5.01951200  | 0.31144300  |
| C                         | -2.08768400 | 4.41389900  | 0.43175700  | C                         | 2.10361900  | 4.40570500  | -0.43229900 |
| C                         | -1.20656600 | 5.30051500  | 1.33578400  | C                         | 1.22444800  | 5.29549600  | -1.33514100 |
| C                         | -1.34099700 | 3.29285600  | -0.31803800 | C                         | 1.35380700  | 3.28826600  | 0.31968700  |
| H                         | -2.87623500 | 3.94409600  | 1.02977800  | H                         | 2.88912200  | 3.93239300  | -1.03154500 |
| H                         | -1.82180400 | 5.67605500  | 2.16067600  | H                         | 1.83961300  | 5.66765000  | -2.16163000 |
| C                         | 0.03412900  | 4.56353700  | 1.88443500  | C                         | -0.02063300 | 4.56366500  | -1.88062500 |
| H                         | -0.87007800 | 6.18640400  | 0.78631700  | H                         | 0.89309300  | 6.18332100  | -0.78567600 |
| N                         | -0.55259700 | 2.49444900  | 0.67755700  | N                         | 0.55917700  | 2.49295900  | -0.67335900 |
| C                         | -0.11468800 | 3.03306600  | 2.00763600  | C                         | 0.12131800  | 3.03245900  | -2.00316900 |
| H                         | 0.30402300  | 4.95809700  | 2.87048500  | H                         | -0.29098100 | 4.95886800  | -2.86629900 |
| H                         | 0.89536600  | 4.75746000  | 1.23513000  | H                         | -0.87960800 | 4.76157500  | -1.22952700 |
| O                         | -0.21322600 | 1.29343900  | 0.36290000  | O                         | 0.20892100  | 1.29644900  | -0.35354600 |
| C                         | 1.25060800  | 2.42227000  | 2.36085800  | C                         | -1.24714200 | 2.42738000  | -2.35384400 |
| H                         | 1.18380100  | 1.34102200  | 2.48856700  | H                         | -1.18518200 | 1.34582300  | -2.48132900 |
| H                         | 1.98773400  | 2.62629000  | 1.57898500  | H                         | -1.98218200 | 2.63466700  | -1.57089800 |
| H                         | 1.60840600  | 2.86364700  | 3.29667000  | H                         | -1.60447200 | 2.87000600  | -3.28924600 |
| C                         | -1.14646300 | 2.63056100  | 3.08455900  | C                         | 1.14948100  | 2.62491500  | -3.08166300 |
| H                         | -0.78758700 | 2.93348600  | 4.07432000  | H                         | 0.79056200  | 2.92972000  | -4.07084300 |
| H                         | -2.12173200 | 3.09626400  | 2.92276700  | H                         | 2.12731200  | 3.08573600  | -2.92140800 |
| H                         | -1.28149400 | 1.54508600  | 3.08574500  | H                         | 1.27913000  | 1.53877500  | -3.08324100 |
| C                         | -0.37640300 | 3.85188100  | -1.38657900 | C                         | 0.39460900  | 3.85200200  | 1.39061200  |
| H                         | 0.18495900  | 3.03304900  | -1.84507000 | H                         | -0.16959200 | 3.03591300  | 1.85048400  |
| H                         | -0.94634000 | 4.35968200  | -2.17201300 | H                         | 0.96900200  | 4.35697800  | 2.17460900  |
| H                         | 0.33727200  | 4.56713300  | -0.96848800 | H                         | -0.31656300 | 4.57075900  | 0.97424400  |
| C                         | -2.36623500 | 2.36456100  | -0.98832900 | C                         | 2.37654800  | 2.35536100  | 0.98749200  |
| H                         | -1.87995600 | 1.57169900  | -1.55722500 | H                         | 1.88797500  | 1.56364300  | 1.55602200  |
| H                         | -3.01693200 | 1.89979800  | -0.24141200 | H                         | 3.02432500  | 1.88900200  | 0.23901000  |
| H                         | -2.98880400 | 2.95082600  | -1.67201100 | H                         | 3.00246300  | 2.93831900  | 1.67094600  |
| C                         | 2.53569000  | 0.05950700  | -1.17980100 | C                         | -2.53222900 | 0.06400400  | 1.19562100  |
| O                         | 1.68854600  | -1.03813800 | -1.36819100 | O                         | -1.68909500 | -1.03813200 | 1.37600700  |
| H                         | 2.56468000  | 0.64750600  | -2.11547800 | H                         | -2.55966800 | 0.64461400  | 2.13593000  |
| H                         | 2.14461900  | 0.73532200  | -0.40408700 | H                         | -2.13816500 | 0.74439300  | 0.42544900  |
| C                         | -3.61981400 | -1.27441600 | -3.39925300 | C                         | 3.62599200  | -1.29507600 | 3.38751500  |
| N                         | -1.43343400 | -0.97805200 | -2.80101500 | N                         | 1.43798600  | -0.99203700 | 2.79852800  |
| C                         | -2.92685200 | -0.72879600 | -4.48668800 | C                         | 2.93824100  | -0.75196500 | 4.47946700  |
| H                         | -4.66827100 | -1.53898200 | -3.35248300 | H                         | 4.67372200  | -1.56160500 | 3.33585100  |
| C                         | -1.58661000 | -0.56439700 | -4.07209200 | C                         | 1.59676800  | -0.58332000 | 4.07046400  |
| H                         | -3.32653200 | -0.48084000 | -5.46080600 | H                         | 3.34205300  | -0.50837200 | 5.45298000  |
| H                         | -0.75178300 | -0.17404300 | -4.64055700 | H                         | 0.76488500  | -0.19322200 | 4.64340100  |
| C                         | -2.72510000 | -1.91218200 | -1.04177700 | C                         | 2.72116500  | -1.92242900 | 1.03112500  |

|                            |             |             |             |                           |             |             |             |
|----------------------------|-------------|-------------|-------------|---------------------------|-------------|-------------|-------------|
| H                          | -3.66418000 | -2.27504400 | -0.62146000 | H                         | 3.65792600  | -2.28563200 | 0.60598900  |
| N                          | -1.62398200 | -1.89822600 | -0.32286900 | N                         | 1.61732100  | -1.90367000 | 0.31642400  |
| C                          | -1.56978600 | -2.43367300 | 0.98080000  | C                         | 1.55681100  | -2.43441400 | -0.98887000 |
| C                          | -0.71576100 | -1.82775700 | 1.91874900  | C                         | 0.69866300  | -1.82478700 | -1.92063400 |
| C                          | -2.31103200 | -3.56659500 | 1.36273300  | C                         | 2.29572400  | -3.56630200 | -1.37841600 |
| C                          | -0.62194800 | -2.32347800 | 3.21806300  | C                         | 0.59864400  | -2.31568500 | -3.22132900 |
| C                          | -2.22704100 | -4.06581900 | 2.66351800  | C                         | 2.20550900  | -4.06069900 | -2.68060700 |
| C                          | -1.38524500 | -3.43146300 | 3.56803300  | C                         | 1.35987000  | -3.42263800 | -3.57892700 |
| H                          | 0.03052100  | -1.86367800 | 3.95251000  | H                         | -0.05713100 | -1.85297900 | -3.95099100 |
| H                          | -2.78654700 | -4.94346800 | 2.96895600  | H                         | 2.76317400  | -4.93748500 | -2.99183200 |
| C                          | -2.67121600 | -1.42185700 | -2.36492400 | C                         | 2.67323400  | -1.43677200 | 2.35617000  |
| H                          | -0.14779100 | -0.95191000 | 1.62093200  | H                         | 0.13211600  | -0.95000000 | -1.61700700 |
| H                          | -2.93180600 | -4.08128500 | 0.63623800  | H                         | 2.91956500  | -4.08401700 | -0.65672600 |
| F                          | -1.29437100 | -3.92010500 | 4.83542900  | F                         | 1.26293400  | -3.90657400 | -4.84767400 |
| C                          | 3.95940800  | -0.34889700 | -0.83175200 | C                         | -3.95712900 | -0.33661100 | 0.84348600  |
| C                          | 4.89655200  | 0.63504200  | -0.48387100 | C                         | -4.89136400 | 0.65371600  | 0.50601400  |
| C                          | 4.36502800  | -1.68698700 | -0.86136400 | C                         | -4.36657600 | -1.67378100 | 0.85843100  |
| C                          | 6.21363800  | 0.29055200  | -0.17467600 | C                         | -6.20925600 | 0.31634000  | 0.19250700  |
| H                          | 4.59376100  | 1.68043700  | -0.45497900 | H                         | -4.58560900 | 1.69850600  | 0.48865200  |
| C                          | 5.68399500  | -2.03488200 | -0.55054100 | C                         | -5.68637800 | -2.01453500 | 0.54324700  |
| H                          | 3.63702300  | -2.44548600 | -1.12784500 | H                         | -3.64085900 | -2.43718000 | 1.11705700  |
| C                          | 6.61292000  | -1.05002400 | -0.20672600 | C                         | -6.61234800 | -1.02338000 | 0.20974100  |
| H                          | 6.92700300  | 1.06565100  | 0.09263900  | H                         | -6.92031700 | 1.09633500  | -0.06658300 |
| H                          | 5.98468300  | -3.07898700 | -0.57637000 | H                         | -5.99003000 | -3.05800400 | 0.55765300  |
| H                          | 7.63657400  | -1.32159800 | 0.03538900  | H                         | -7.63665400 | -1.28940500 | -0.03575100 |
| <b>7</b>                   |             |             |             | <b>TS7-14</b>             |             |             |             |
| Charge=-1 Multiplicity = 1 |             |             |             | Charge=0 Multiplicity = 3 |             |             |             |
| Cu                         | -0.62744800 | 1.35264100  | 0.51399000  | Cu                        | -1.45111900 | 1.45952200  | -0.36291400 |
| O                          | 1.07168700  | 0.35464800  | 0.08393300  | H                         | 1.97223000  | -1.74132400 | 4.53687100  |
| C                          | -1.60455400 | 4.60075100  | -1.82012300 | C                         | 2.05103900  | -1.97155900 | 3.46803000  |
| N                          | -0.55924300 | 3.00784400  | -0.55210900 | C                         | 3.39795500  | -2.66160000 | 3.17207400  |
| C                          | -0.26631400 | 4.98156500  | -1.64182100 | C                         | 1.80052400  | -0.66644000 | 2.67701700  |
| H                          | -2.37486900 | 5.12776800  | -2.37036400 | H                         | 1.22639100  | -2.65647600 | 3.24483000  |
| C                          | 0.33148000  | 3.97286700  | -0.85560800 | H                         | 3.28222200  | -3.73824900 | 3.33971900  |
| H                          | 0.22130300  | 5.87192300  | -2.01876200 | C                         | 3.90875700  | -2.39380500 | 1.73978900  |
| H                          | 1.35263500  | 3.92054000  | -0.49907400 | H                         | 4.15998300  | -2.32837800 | 3.88535100  |
| C                          | -2.88984900 | 2.53261800  | -0.97019700 | N                         | 2.05327700  | -0.90566400 | 1.22058700  |
| H                          | -3.84023000 | 2.85196000  | -1.41485200 | C                         | 2.80362000  | -2.08120800 | 0.71148400  |
| N                          | -2.79738200 | 1.43190900  | -0.27823800 | H                         | 4.48393500  | -3.25173600 | 1.37426500  |
| C                          | -3.88477700 | 0.55683100  | -0.14564900 | H                         | 4.59951300  | -1.54304200 | 1.74576400  |
| C                          | -3.97971400 | -0.20315300 | 1.03879900  | O                         | 1.09345900  | -0.45250600 | 0.36807300  |
| C                          | -4.85609400 | 0.36790800  | -1.15083100 | C                         | 3.46106600  | -1.69169400 | -0.62574900 |
| C                          | -5.03719400 | -1.09173900 | 1.23012300  | H                         | 2.70878100  | -1.46259400 | -1.38369200 |
| C                          | -5.91717800 | -0.52257000 | -0.96495400 | H                         | 4.10023000  | -0.81244400 | -0.50578800 |



|   |             |             |             |   |             |             |             |
|---|-------------|-------------|-------------|---|-------------|-------------|-------------|
| C | -5.99010700 | -1.22929100 | 0.22736300  | H | 4.07481000  | -2.52199600 | -0.99108400 |
| H | -5.11838200 | -1.67525000 | 2.14147900  | C | 1.88065700  | -3.30065800 | 0.46922000  |
| H | -6.66521000 | -0.68054200 | -1.73560700 | H | 2.45150700  | -4.11476800 | 0.00892300  |
| C | -1.75692200 | 3.37455000  | -1.13757800 | H | 1.43293400  | -3.68231600 | 1.38978600  |
| H | -3.20285200 | -0.08442100 | 1.78980800  | H | 1.07306000  | -3.02295700 | -0.21297000 |
| H | -4.76878600 | 0.89639500  | -2.09532000 | C | 2.74460300  | 0.45889800  | 3.16181700  |
| F | -7.02910700 | -2.10755900 | 0.41002700  | H | 2.57672100  | 1.37045800  | 2.57981000  |
| O | -0.77238300 | -0.91970700 | 3.95209400  | H | 2.55736200  | 0.68863000  | 4.21726200  |
| C | -0.35847100 | -0.42564700 | 2.90514500  | H | 3.79632300  | 0.18059400  | 3.05328000  |
| O | 0.92837800  | -0.70327300 | 2.51139800  | C | 0.34433800  | -0.23141900 | 2.91036800  |
| O | -1.04415400 | 0.34122200  | 2.11278000  | H | 0.12376300  | 0.72845300  | 2.43885200  |
| H | 1.08425300  | -0.29859900 | 1.61715500  | H | -0.35961100 | -0.97061400 | 2.51931000  |
| C | 2.06770100  | 0.83211600  | -0.71208800 | H | 0.17650500  | -0.12652700 | 3.98744200  |
| H | 2.55082600  | -0.07433900 | -1.22119500 | C | 1.35612000  | 1.85135400  | -0.73240400 |
| H | 1.67762500  | 1.40763500  | -1.57192200 | O | 0.08947800  | 1.85847100  | -1.22859100 |
| H | -0.85158300 | -4.05757400 | -0.77595800 | H | 1.48945300  | 2.44918000  | 0.18183900  |
| C | -0.18623800 | -3.25687100 | -0.42902200 | H | 1.40231900  | 0.55131700  | -0.11684400 |
| C | 0.58213400  | -3.70883100 | 0.83003100  | C | -4.39831200 | 2.76508900  | 2.09633000  |
| C | 0.70091600  | -2.84264100 | -1.63902500 | N | -2.51818200 | 2.60424500  | 0.80590400  |
| C | 1.94665200  | -4.30684200 | 0.48565300  | C | -3.68033400 | 3.96140500  | 2.19787600  |
| H | -0.01768000 | -4.43994300 | 1.38370200  | H | -5.33410800 | 2.51621300  | 2.57966000  |
| C | 2.87197700  | -3.28156700 | -0.20535300 | C | -2.53116100 | 3.81598400  | 1.38813500  |
| H | 1.82688800  | -5.19347200 | -0.15057500 | H | -3.94203900 | 4.83550800  | 2.77871100  |
| H | 0.72118000  | -2.85727400 | 1.50142400  | H | -1.73807800 | 4.53225000  | 1.21396800  |
| H | -0.82787600 | -2.41285100 | -0.16130100 | C | -3.84040700 | 0.63545100  | 0.71247400  |
| H | 2.45375800  | -4.64864000 | 1.39548000  | H | -4.71306800 | 0.04427900  | 0.99196100  |
| C | 0.06459400  | -1.65190400 | -2.36767400 | N | -2.92139700 | 0.14254900  | -0.09363800 |
| H | 0.60911600  | -1.39905300 | -3.28052200 | C | -3.06451000 | -1.10982100 | -0.72764500 |
| H | -0.96334800 | -1.92084500 | -2.63301400 | C | -1.90795600 | -1.86367200 | -0.99462600 |
| H | 0.04096900  | -0.78027800 | -1.71100100 | C | -4.31648300 | -1.61127200 | -1.12949300 |
| C | 0.86228000  | -4.00769500 | -2.65381400 | C | -2.00060700 | -3.10574300 | -1.62076000 |
| H | -0.11065200 | -4.21898000 | -3.11106100 | C | -4.41712800 | -2.85609600 | -1.75165600 |
| H | 1.56148000  | -3.72071500 | -3.44568200 | C | -3.25528100 | -3.58212400 | -1.98226400 |
| H | 1.21651200  | -4.92933700 | -2.18563800 | H | -1.11730400 | -3.70040500 | -1.82681900 |
| C | 3.51687000  | -2.34096500 | 0.83160700  | H | -5.37495800 | -3.25151900 | -2.07218800 |
| H | 4.23255100  | -2.91179600 | 1.43370700  | C | -3.65875100 | 1.93650600  | 1.22418500  |
| H | 4.05607100  | -1.53367400 | 0.33063100  | H | -0.93876300 | -1.47602800 | -0.69250500 |
| H | 2.77338600  | -1.90577300 | 1.50088300  | H | -5.21321600 | -1.01747100 | -0.98442500 |
| C | 3.98732300  | -3.99927500 | -0.99813200 | F | -3.34839300 | -4.79267800 | -2.59613500 |
| H | 4.64872700  | -3.26975800 | -1.47169800 | C | 2.46203600  | 1.95139600  | -1.69456300 |
| H | 4.57618000  | -4.61599200 | -0.31027600 | C | 3.76213200  | 2.26983000  | -1.24789100 |
| H | 3.57383800  | -4.65069700 | -1.77388200 | C | 2.26997900  | 1.68932900  | -3.06638900 |
| N | 2.06680900  | -2.44487100 | -1.16209500 | C | 4.83119600  | 2.32336800  | -2.13982500 |
| O | 2.73783800  | -1.63304600 | -1.89083600 | H | 3.92614600  | 2.48456700  | -0.19412400 |

|                          |             |             |             |                          |             |             |             |
|--------------------------|-------------|-------------|-------------|--------------------------|-------------|-------------|-------------|
| C                        | 3.18025400  | 1.62441000  | -0.04650100 | C                        | 3.34253800  | 1.74577500  | -3.95540500 |
| C                        | 3.20207800  | 1.87245400  | 1.33192900  | H                        | 1.27023700  | 1.45651200  | -3.41773600 |
| C                        | 4.22798800  | 2.12856900  | -0.83587400 | C                        | 4.62862300  | 2.05956900  | -3.50021600 |
| C                        | 4.24432000  | 2.60853300  | 1.90565300  | H                        | 5.82337600  | 2.57877700  | -1.77739900 |
| H                        | 2.40044600  | 1.48946300  | 1.95387800  | H                        | 3.17547100  | 1.54873000  | -5.01111100 |
| C                        | 5.26913600  | 2.86203700  | -0.26615200 | H                        | 5.46096100  | 2.10465000  | -4.19650200 |
| H                        | 4.22073500  | 1.94346100  | -1.90851200 |                          |             |             |             |
| C                        | 5.28157400  | 3.10574300  | 1.11269100  |                          |             |             |             |
| H                        | 4.24052000  | 2.79390600  | 2.97678000  |                          |             |             |             |
| H                        | 6.06939500  | 3.24514700  | -0.89494400 |                          |             |             |             |
| H                        | 6.08961500  | 3.67836000  | 1.56083400  |                          |             |             |             |
| <b>8</b>                 |             |             |             | <b>9</b>                 |             |             |             |
| Charge=0 Multiplicity =2 |             |             |             | Charge=0 Multiplicity =2 |             |             |             |
| Cu                       | 1.18968600  | 0.58568100  | 0.02028600  | Cu                       | 0.00756700  | 0.46143300  | 0.31681600  |
| C                        | 2.66049400  | -3.15860700 | -0.17211300 | C                        | 0.59880400  | 4.41962900  | -0.30696700 |
| N                        | 2.40236800  | -0.89693500 | 0.00180700  | N                        | -0.27325700 | 2.37009000  | 0.19479800  |
| C                        | 3.92477400  | -2.56989500 | -0.04537600 | C                        | -0.72697800 | 4.58698600  | 0.11513900  |
| H                        | 2.43294000  | -4.21170000 | -0.27186500 | H                        | 1.29428200  | 5.19072400  | -0.61143300 |
| C                        | 3.71888700  | -1.17872200 | 0.05717300  | C                        | -1.22318800 | 3.30144800  | 0.41277600  |
| H                        | 4.88241500  | -3.07199400 | -0.03240600 | H                        | -1.27444300 | 5.51569300  | 0.20174300  |
| H                        | 4.45965800  | -0.39612700 | 0.15974900  | H                        | -2.20589700 | 3.02834000  | 0.77557200  |
| C                        | 0.32285800  | -2.01871400 | -0.20270400 | C                        | 1.99181700  | 2.23221700  | -0.49659700 |
| H                        | -0.28494900 | -2.91824100 | -0.30343900 | H                        | 2.92445900  | 2.68200900  | -0.83982700 |
| N                        | -0.24592400 | -0.83193800 | -0.15887800 | N                        | 1.89988900  | 0.93245100  | -0.32592300 |
| C                        | -1.64700600 | -0.67327900 | -0.08108300 | C                        | 3.03025800  | 0.09466700  | -0.45298500 |
| C                        | -2.25471200 | 0.40440000  | -0.74725900 | C                        | 2.88303000  | -1.17849900 | -1.02858900 |
| C                        | -2.44591300 | -1.56003200 | 0.66435300  | C                        | 4.29959200  | 0.49845900  | -0.00054600 |
| C                        | -3.63691700 | 0.57215600  | -0.70483800 | C                        | 3.98409700  | -2.01850800 | -1.18416200 |
| C                        | -3.83114200 | -1.40302400 | 0.70559200  | C                        | 5.40875000  | -0.33266300 | -0.15865200 |
| C                        | -4.40047800 | -0.34046600 | 0.01427300  | C                        | 5.22910900  | -1.57541500 | -0.75330800 |
| H                        | -4.11970200 | 1.39853800  | -1.21463700 | H                        | 3.88239100  | -3.00487600 | -1.62298800 |
| H                        | -4.46016700 | -2.07659900 | 1.27733200  | H                        | 6.39218200  | -0.03595500 | 0.18960200  |
| C                        | 1.72951100  | -2.10080900 | -0.13794500 | C                        | 0.85771400  | 3.03581300  | -0.24407900 |
| H                        | -1.63758100 | 1.11555500  | -1.28294500 | H                        | 1.89919000  | -1.51087000 | -1.33859700 |
| H                        | -1.98390200 | -2.35996000 | 1.23415900  | H                        | 4.41721600  | 1.45309700  | 0.50222400  |
| F                        | -5.74855900 | -0.17920400 | 0.05802600  | F                        | 6.30600400  | -2.39188400 | -0.90240400 |
| O                        | 1.04613300  | 4.32281100  | 0.17145800  | O                        | 0.92385700  | -3.12811600 | 1.83902200  |
| C                        | 1.08491700  | 3.11685500  | 0.13041500  | C                        | 0.76069000  | -1.94346600 | 1.60237200  |
| O                        | 2.33269000  | 2.42299800  | 0.22662800  | O                        | 1.23571900  | -0.97015100 | 2.46232200  |
| O                        | 0.17412100  | 2.21332800  | 0.00549900  | O                        | 0.14372200  | -1.42399200 | 0.58117300  |
| H                        | 3.07712000  | 3.03846000  | 0.31141300  | H                        | 1.68120000  | -1.43624600 | 3.18624400  |
|                          |             |             |             | C                        | -2.91001900 | 0.12625900  | -0.86211500 |
|                          |             |             |             | H                        | -2.40819200 | -0.25151400 | -1.76005600 |
|                          |             |             |             | O                        | -2.04765700 | -0.07569400 | 0.29370300  |

|                          |                          |             |             |             |             |             |             |
|--------------------------|--------------------------|-------------|-------------|-------------|-------------|-------------|-------------|
|                          | H                        | -1.90338600 | -1.02947000 | 0.43633200  |             |             |             |
|                          | H                        | -3.00526100 | 1.21018800  | -0.94798300 |             |             |             |
|                          | C                        | -4.24695300 | -0.54311200 | -0.67530300 |             |             |             |
|                          | C                        | -4.55775800 | -1.71654700 | -1.37498900 |             |             |             |
|                          | C                        | -5.19077500 | -0.01125900 | 0.21705600  |             |             |             |
|                          | C                        | -5.79026600 | -2.34946400 | -1.18932900 |             |             |             |
|                          | H                        | -3.83437200 | -2.13625100 | -2.06994400 |             |             |             |
|                          | C                        | -6.41997400 | -0.64249800 | 0.40609100  |             |             |             |
|                          | H                        | -4.95713000 | 0.89692300  | 0.76644800  |             |             |             |
|                          | C                        | -6.72194600 | -1.81360600 | -0.29792000 |             |             |             |
|                          | H                        | -6.01977800 | -3.25766800 | -1.73862200 |             |             |             |
|                          | H                        | -7.14348300 | -0.22175500 | 1.09817900  |             |             |             |
|                          | H                        | -7.68005000 | -2.30378000 | -0.15217900 |             |             |             |
| <b>TS9-10</b>            | <b>10</b>                |             |             |             |             |             |             |
| Charge=0 Multiplicity =2 | Charge=0 Multiplicity =2 |             |             |             |             |             |             |
| Cu                       | -0.07982200              | 0.12229400  | -0.17433700 | Cu          | -0.14883300 | -0.36133900 | -0.45295900 |
| C                        | -0.71402200              | 4.06676300  | 0.46837900  | C           | 0.47450200  | -4.04594200 | -1.97359900 |
| N                        | -0.96879600              | 1.82676100  | 0.11462500  | N           | -0.43839000 | -2.06519200 | -1.29161100 |
| C                        | -2.07876700              | 3.76031300  | 0.47943500  | C           | -0.89737200 | -4.06648200 | -2.24306200 |
| H                        | -0.25590900              | 5.03672600  | 0.61107100  | H           | 1.19622400  | -4.82630100 | -2.17599300 |
| C                        | -2.19083700              | 2.36925900  | 0.25779500  | C           | -1.41912800 | -2.82872600 | -1.80494600 |
| H                        | -2.90275000              | 4.44533900  | 0.62567900  | H           | -1.46424800 | -4.86869500 | -2.69525300 |
| H                        | -3.08565400              | 1.76396200  | 0.19739300  | H           | -2.44383100 | -2.48156800 | -1.83930200 |
| C                        | 1.31088500               | 2.46513000  | 0.14048000  | C           | 1.89392200  | -2.15011300 | -0.89637800 |
| H                        | 2.11018500               | 3.20191700  | 0.22075700  | H           | 2.86702600  | -2.63981700 | -0.93599100 |
| N                        | 1.59704000               | 1.19529700  | -0.08139000 | N           | 1.76873500  | -0.94621600 | -0.36992100 |
| C                        | 2.94175200               | 0.75310700  | -0.12221800 | C           | 2.88056700  | -0.17357700 | 0.02335800  |
| C                        | 3.33722300               | -0.15739300 | -1.11415100 | C           | 2.74452300  | 0.70926800  | 1.10820400  |
| C                        | 3.88875400               | 1.20194400  | 0.81410200  | C           | 4.11406300  | -0.23746600 | -0.65143300 |
| C                        | 4.65846300               | -0.59134700 | -1.19293800 | C           | 3.81892300  | 1.48541900  | 1.53719100  |
| C                        | 5.21567900               | 0.77579200  | 0.74257300  | C           | 5.19814700  | 0.52956200  | -0.22489000 |
| C                        | 5.57452300               | -0.11171600 | -0.26385900 | C           | 5.03108400  | 1.37463400  | 0.86533700  |
| H                        | 4.97869100               | -1.29220400 | -1.95598300 | H           | 3.72585100  | 2.16645100  | 2.37597300  |
| H                        | 5.95680800               | 1.10913400  | 1.46086900  | H           | 6.15245200  | 0.49269500  | -0.73896200 |
| C                        | -0.03956100              | 2.84699800  | 0.24370800  | C           | 0.74012500  | -2.79118800 | -1.38332600 |
| H                        | 2.60330100               | -0.52578300 | -1.82228700 | H           | 1.78902500  | 0.77939900  | 1.61680500  |
| H                        | 3.58266200               | 1.86604600  | 1.61638400  | H           | 4.22201100  | -0.86593800 | -1.52937400 |
| F                        | 6.86460800               | -0.53575300 | -0.33482900 | F           | 6.08245800  | 2.12893400  | 1.27838000  |
| O                        | 0.44361000               | -3.89386800 | 1.00360300  | O           | -3.53640600 | 2.89659900  | -0.93763700 |
| C                        | 1.08252000               | -2.93621900 | 0.61628400  | C           | -2.71170200 | 3.27324500  | -1.75725000 |
| O                        | 2.35145000               | -2.67197300 | 1.01162300  | O           | -3.01370600 | 4.11007800  | -2.77580700 |
| O                        | 0.66705400               | -2.01784200 | -0.24756600 | O           | -1.43384200 | 2.95436900  | -1.80012000 |
| H                        | 2.59926100               | -3.38367400 | 1.62195800  | H           | -3.95720100 | 4.31296700  | -2.68809500 |
| C                        | -2.55792600              | -1.15113800 | -1.33709500 | C           | -1.39260500 | 1.53570400  | 1.33617100  |

|                          |             |             |             |                          |             |             |             |
|--------------------------|-------------|-------------|-------------|--------------------------|-------------|-------------|-------------|
| H                        | -2.58908700 | -2.12709500 | -1.84571300 | O                        | -0.84034200 | 1.23575100  | 0.05042900  |
| O                        | -1.45918700 | -1.16698900 | -0.44254700 | H                        | -1.21361200 | 2.30522100  | -1.05401200 |
| H                        | -0.44500900 | -1.98052200 | -0.41921400 | H                        | -2.04561600 | 2.40734600  | 1.21569000  |
| H                        | -2.41901500 | -0.39152200 | -2.11954600 | C                        | -2.17357100 | 0.37702300  | 1.91272400  |
| C                        | -3.88260700 | -0.91133200 | -0.63575100 | C                        | -3.47730900 | 0.12183100  | 1.45675700  |
| C                        | -4.93690800 | -0.29136200 | -1.31982500 | C                        | -1.61039100 | -0.47277900 | 2.87449900  |
| C                        | -4.08820100 | -1.33981200 | 0.68204600  | C                        | -4.19562900 | -0.96840400 | 1.95058100  |
| C                        | -6.17856400 | -0.10937700 | -0.70416900 | H                        | -3.91684000 | 0.78649300  | 0.71733000  |
| H                        | -4.78665300 | 0.05536800  | -2.34024100 | C                        | -2.32903900 | -1.56584800 | 3.36934600  |
| C                        | -5.32700900 | -1.15411000 | 1.30099800  | H                        | -0.60792600 | -0.27354700 | 3.24775300  |
| H                        | -3.26971600 | -1.81018000 | 1.21744700  | C                        | -3.62274700 | -1.81567200 | 2.90605300  |
| C                        | -6.37671500 | -0.54051500 | 0.61037700  | H                        | -5.20564800 | -1.15453000 | 1.59605200  |
| H                        | -6.98538000 | 0.37474400  | -1.24740300 | H                        | -1.88184300 | -2.21523500 | 4.11662900  |
| H                        | -5.47263400 | -1.48948700 | 2.32413400  | H                        | -4.18476300 | -2.66186200 | 3.29090400  |
| H                        | -7.33895300 | -0.39647000 | 1.09335900  | H                        | -0.57324200 | 1.81790400  | 2.01400600  |
| <b>11</b>                |             |             |             | <b>12</b>                |             |             |             |
| Charge=0 Multiplicity =2 |             |             |             | Charge=0 Multiplicity =2 |             |             |             |
| Cu                       | -1.21130400 | 1.29698300  | -0.11029300 | Cu                       | -0.09390100 | -0.36077600 | 0.27230100  |
| C                        | -3.29831100 | -2.14204100 | 0.20573500  | C                        | -1.12709000 | -4.22745600 | -0.41810700 |
| N                        | -2.66504500 | 0.04095800  | -0.03626200 | N                        | -0.00995700 | -2.28218100 | 0.02393500  |
| C                        | -4.44726500 | -1.35081600 | 0.09426700  | C                        | 0.22800700  | -4.52200900 | -0.22622500 |
| H                        | -3.24898500 | -3.21598300 | 0.32879400  | H                        | -1.92662000 | -4.92217000 | -0.64028100 |
| C                        | -4.01025300 | -0.01647000 | -0.04983800 | C                        | 0.87462300  | -3.29618700 | 0.04301100  |
| H                        | -5.47610600 | -1.68332000 | 0.11486900  | H                        | 0.69968100  | -5.49436100 | -0.27075600 |
| H                        | -4.61088600 | 0.87808000  | -0.15584000 | H                        | 1.92231500  | -3.12129800 | 0.25180100  |
| C                        | -0.80234600 | -1.41507400 | 0.16616200  | C                        | -2.33344800 | -1.92839200 | -0.30158400 |
| H                        | -0.35986800 | -2.40113600 | 0.30819900  | H                        | -3.34177600 | -2.28362400 | -0.52125600 |
| N                        | -0.04715400 | -0.34154300 | 0.05946800  | N                        | -2.10298000 | -0.64905800 | -0.10015500 |
| C                        | 1.36227900  | -0.38365900 | 0.03006100  | C                        | -3.15674900 | 0.28827400  | -0.05742100 |
| C                        | 2.07542500  | 0.75237300  | 0.45252300  | C                        | -2.96959800 | 1.55686300  | -0.63450900 |
| C                        | 2.07687900  | -1.50770800 | -0.42579000 | C                        | -4.38503300 | -0.00383900 | 0.56402300  |
| C                        | 3.46919800  | 0.75478900  | 0.45903000  | C                        | -3.99479100 | 2.50196600  | -0.62099100 |
| C                        | 3.47164800  | -1.51403500 | -0.41785400 | C                        | -5.41799300 | 0.93471500  | 0.57817300  |
| C                        | 4.14271600  | -0.38313800 | 0.03105900  | C                        | -5.20331900 | 2.17014800  | -0.01923500 |
| H                        | 4.02905800  | 1.62347900  | 0.78807700  | H                        | -3.86543500 | 3.48109600  | -1.06945400 |
| H                        | 4.03354000  | -2.37214800 | -0.77053700 | H                        | -6.36753600 | 0.72301900  | 1.05789700  |
| C                        | -2.20267300 | -1.25749800 | 0.12037200  | C                        | -1.25028500 | -2.83143100 | -0.25408600 |
| H                        | 1.52540900  | 1.63519000  | 0.76451000  | H                        | -2.01411100 | 1.79100800  | -1.09078100 |
| H                        | 1.54974500  | -2.37377100 | -0.81216700 | H                        | -4.52585800 | -0.95859400 | 1.06081600  |
| F                        | 5.50250600  | -0.38472100 | 0.03303200  | F                        | -6.20488900 | 3.09100200  | -0.00237000 |
| O                        | -0.46892600 | 2.92193300  | -0.10977100 | O                        | 0.02823100  | 1.46468400  | 0.59610800  |
| H                        | -0.12362000 | 3.26789900  | -0.94335700 | H                        | -0.71861600 | 1.88670700  | 1.03542000  |
|                          |             |             |             | O                        | 2.03013500  | -0.01338900 | 0.45777500  |
|                          |             |             |             | C                        | 2.89482100  | 0.05078400  | -0.70233900 |

|                          |             |             |             |                          |             |             |             |
|--------------------------|-------------|-------------|-------------|--------------------------|-------------|-------------|-------------|
|                          |             |             |             | H                        | 3.03757600  | -0.98735100 | -1.01179000 |
|                          |             |             |             | H                        | 2.38519700  | 0.58837300  | -1.51075800 |
|                          |             |             |             | H                        | 1.76279700  | 0.89714100  | 0.72446400  |
|                          |             |             |             | C                        | 4.21240400  | 0.71040200  | -0.37692800 |
|                          |             |             |             | C                        | 4.45230900  | 2.04093100  | -0.74474000 |
|                          |             |             |             | C                        | 5.20703700  | 0.00885200  | 0.32077600  |
|                          |             |             |             | C                        | 5.66229900  | 2.66193900  | -0.42174700 |
|                          |             |             |             | H                        | 3.68859100  | 2.59355500  | -1.28672800 |
|                          |             |             |             | C                        | 6.41539800  | 0.62604300  | 0.64579600  |
|                          |             |             |             | H                        | 5.02933800  | -1.02303400 | 0.61265300  |
|                          |             |             |             | C                        | 6.64541400  | 1.95522500  | 0.27450500  |
|                          |             |             |             | H                        | 5.83566700  | 3.69348000  | -0.71423500 |
|                          |             |             |             | H                        | 7.17847100  | 0.07180200  | 1.18468400  |
|                          |             |             |             | H                        | 7.58704100  | 2.43507300  | 0.52515000  |
| <b>TS12-13</b>           |             |             |             | <b>13</b>                |             |             |             |
| Charge=0 Multiplicity =2 |             |             |             | Charge=0 Multiplicity =2 |             |             |             |
| Cu                       | -0.07556500 | 0.24689400  | -0.01879300 | Cu                       | 0.01129600  | -0.26374000 | -0.32440800 |
| C                        | -0.90455600 | 4.21545200  | 0.13025600  | C                        | -0.36073900 | 3.77702100  | -0.03627300 |
| N                        | 0.12433300  | 2.17853100  | 0.00874800  | N                        | -0.76181600 | 1.53350900  | -0.22385800 |
| C                        | 0.47733800  | 4.41493000  | 0.03555200  | C                        | -1.74089000 | 3.57304500  | -0.12335100 |
| H                        | -1.67559900 | 4.97169500  | 0.19920600  | H                        | 0.16173400  | 4.71941500  | 0.06499800  |
| C                        | 1.06917800  | 3.13489200  | -0.03739100 | C                        | -1.94144900 | 2.17824100  | -0.23640400 |
| H                        | 1.00343300  | 5.35973500  | 0.01850300  | H                        | -2.51791200 | 4.32519300  | -0.10483100 |
| H                        | 2.11884100  | 2.88564800  | -0.12466200 | H                        | -2.87732400 | 1.64059200  | -0.31152000 |
| C                        | -2.23528400 | 1.98283300  | 0.14327500  | C                        | 1.55289600  | 2.02368300  | -0.03375100 |
| H                        | -3.23611800 | 2.40918200  | 0.22327200  | H                        | 2.38501800  | 2.72146500  | 0.06966800  |
| N                        | -2.06488200 | 0.67708900  | 0.09836600  | N                        | 1.77532600  | 0.72597300  | -0.12058300 |
| C                        | -3.17117200 | -0.20015100 | 0.03626600  | C                        | 3.08527800  | 0.21652000  | 0.03441300  |
| C                        | -3.12767400 | -1.41414800 | 0.74397100  | C                        | 3.52968200  | -0.82005900 | -0.80431000 |
| C                        | -4.31049300 | 0.10051800  | -0.73299700 | C                        | 3.95670700  | 0.71140600  | 1.02229400  |
| C                        | -4.20877800 | -2.29415300 | 0.71137400  | C                        | 4.82003700  | -1.33342300 | -0.68068000 |
| C                        | -5.39868000 | -0.77284100 | -0.76789300 | C                        | 5.25218700  | 0.20696100  | 1.15152300  |
| C                        | -5.32773900 | -1.95369900 | -0.04011800 | C                        | 5.66009900  | -0.80579000 | 0.29347200  |
| H                        | -4.19077200 | -3.22962000 | 1.26012500  | H                        | 5.17584700  | -2.12714500 | -1.32866400 |
| H                        | -6.28003200 | -0.55429700 | -1.36115500 | H                        | 5.93036500  | 0.57882100  | 1.91205500  |
| C                        | -1.10052800 | 2.81804700  | 0.10799000  | C                        | 0.22867300  | 2.49473500  | -0.09646600 |
| H                        | -2.23951200 | -1.66184000 | 1.31376200  | H                        | 2.85733700  | -1.21985700 | -1.55444100 |
| H                        | -4.33789800 | 1.00767500  | -1.32843500 | H                        | 3.61274200  | 1.47769100  | 1.70999400  |
| F                        | -6.38253100 | -2.81189100 | -0.07593300 | F                        | 6.91911500  | -1.30658900 | 0.41807700  |
| O                        | -0.05836500 | -1.74920200 | 0.02621100  | O                        | 0.84585900  | -2.25422000 | -0.11269600 |
| H                        | -0.45022800 | -2.23192700 | -0.71334100 | H                        | 1.13260700  | -2.58047500 | 0.75031400  |
| O                        | 1.79710600  | -0.41672000 | -0.22462000 | O                        | -1.40374300 | -1.44343000 | -0.66865500 |
| C                        | 2.81040600  | -0.25150300 | 0.75472600  | C                        | -2.62562400 | -1.18633500 | -1.29707800 |
| H                        | 2.90150900  | 0.81881800  | 0.99036100  | H                        | -2.56984900 | -0.28307600 | -1.92704200 |

|                          |             |             |             |                          |             |             |             |
|--------------------------|-------------|-------------|-------------|--------------------------|-------------|-------------|-------------|
| H                        | 2.53712100  | -0.76095200 | 1.69206100  | H                        | -2.84041000 | -2.01935400 | -1.98932500 |
| H                        | 1.06530100  | -1.41199000 | -0.13964200 | H                        | -0.07956300 | -2.55568700 | -0.28211800 |
| C                        | 4.15650600  | -0.77304800 | 0.28035800  | C                        | -3.81100000 | -1.04352800 | -0.34890800 |
| C                        | 5.14384100  | -1.10519900 | 1.21842700  | C                        | -5.05400400 | -0.62581400 | -0.84894700 |
| C                        | 4.44890800  | -0.89586700 | -1.08305100 | C                        | -3.70131000 | -1.34058000 | 1.01321400  |
| C                        | 6.40373400  | -1.54240100 | 0.80359300  | C                        | -6.16220000 | -0.50980500 | -0.00780500 |
| H                        | 4.92530100  | -1.02601800 | 2.28147100  | H                        | -5.15503000 | -0.38822000 | -1.90665500 |
| C                        | 5.70814300  | -1.33775600 | -1.50006000 | C                        | -4.80906500 | -1.22396500 | 1.85990200  |
| H                        | 3.68055700  | -0.64978400 | -1.80841100 | H                        | -2.73929300 | -1.65916000 | 1.40051500  |
| C                        | 6.69020600  | -1.66036900 | -0.55994200 | C                        | -6.04289100 | -0.80899400 | 1.35392800  |
| H                        | 7.15726200  | -1.79818100 | 1.54339400  | H                        | -7.11652600 | -0.18348700 | -0.41240900 |
| H                        | 5.92117100  | -1.43089100 | -2.56156100 | H                        | -4.70637000 | -1.45683300 | 2.91653700  |
| H                        | 7.66757600  | -2.00534200 | -0.88509200 | H                        | -6.90282300 | -0.71720700 | 2.01130600  |
| <b>14</b>                |             |             |             | <b>14</b>                |             |             |             |
| Charge=0 Multiplicity =1 |             |             |             | Charge=0 Multiplicity =3 |             |             |             |
| Cu                       | 0.56438600  | 0.55891400  | -1.89407700 | Cu                       | 0.33205700  | -1.47684400 | 0.26178000  |
| H                        | 0.98707600  | -5.36565300 | 0.75865900  | H                        | 0.46283400  | 4.06694500  | 3.41119500  |
| C                        | 0.79339400  | -4.47371700 | 1.36635600  | C                        | 0.25987900  | 3.95577800  | 2.33948400  |
| C                        | -0.54910500 | -4.62428300 | 2.11175500  | C                        | -0.51383400 | 5.18427600  | 1.81976100  |
| C                        | 0.87553300  | -3.23512600 | 0.44290800  | C                        | -0.45951500 | 2.60159400  | 2.12767100  |
| H                        | 1.61767800  | -4.41960800 | 2.08423100  | H                        | 1.24069400  | 3.90076300  | 1.85608900  |
| H                        | -0.37083100 | -5.13677500 | 3.06379600  | H                        | 0.20714300  | 5.95912900  | 1.53531900  |
| C                        | -1.23796000 | -3.26643800 | 2.36019800  | C                        | -1.43306900 | 4.84440500  | 0.62780600  |
| H                        | -1.22952700 | -5.27114400 | 1.54609200  | H                        | -1.12007800 | 5.61918000  | 2.62225100  |
| N                        | 0.42430800  | -1.95719600 | 1.13932700  | N                        | -1.00066800 | 2.46007500  | 0.72020700  |
| C                        | -0.26240000 | -2.07872600 | 2.46441100  | C                        | -0.96912400 | 3.63000800  | -0.20044900 |
| H                        | -1.83635000 | -3.30305600 | 3.27773100  | H                        | -1.52350700 | 5.70576300  | -0.04342200 |
| H                        | -1.94164000 | -3.04991400 | 1.54659200  | H                        | -2.44535700 | 4.62670400  | 0.98732300  |
| O                        | 1.53012000  | -1.04963800 | 1.33166800  | O                        | -0.43788100 | 1.32370100  | 0.03007200  |
| C                        | -1.06734200 | -0.78250100 | 2.67694100  | C                        | -2.00760100 | 3.36343700  | -1.30809400 |
| H                        | -0.40622700 | 0.08787300  | 2.68273600  | H                        | -1.71668100 | 2.50354500  | -1.91818500 |
| H                        | -1.80620500 | -0.64807200 | 1.88011000  | H                        | -2.98974100 | 3.16026000  | -0.87081300 |
| H                        | -1.59909000 | -0.81298400 | 3.63460200  | H                        | -2.09096600 | 4.23306000  | -1.96949700 |
| C                        | 0.69387900  | -2.24221400 | 3.67141600  | C                        | 0.39857000  | 3.89011800  | -0.87684100 |
| H                        | 0.10609100  | -2.28885500 | 4.59509000  | H                        | 0.31112800  | 4.73573300  | -1.56825100 |
| H                        | 1.30272500  | -3.14606100 | 3.61970600  | H                        | 1.19455200  | 4.12252000  | -0.16701200 |
| H                        | 1.36784100  | -1.38600800 | 3.73672000  | H                        | 0.70239200  | 3.01474200  | -1.45580400 |
| C                        | -0.06076500 | -3.42214600 | -0.77265100 | C                        | -1.67609200 | 2.49063700  | 3.07457400  |
| H                        | 0.01286700  | -2.55600700 | -1.43865700 | H                        | -2.18640200 | 1.53531300  | 2.91842800  |
| H                        | 0.22116800  | -4.31482700 | -1.34356400 | H                        | -1.35933400 | 2.54972600  | 4.12300700  |
| H                        | -1.10684400 | -3.53417400 | -0.47151400 | H                        | -2.40385000 | 3.28604300  | 2.89203800  |
| C                        | 2.31669300  | -3.11247000 | -0.07666400 | C                        | 0.53200100  | 1.48150400  | 2.47944800  |
| H                        | 2.42966400  | -2.28672700 | -0.78258300 | H                        | 0.06215500  | 0.49543300  | 2.44671200  |
| H                        | 3.02769100  | -2.96192000 | 0.73805300  | H                        | 1.39505900  | 1.47531000  | 1.80930900  |

|                          |             |             |             |                          |             |             |             |
|--------------------------|-------------|-------------|-------------|--------------------------|-------------|-------------|-------------|
| H                        | 2.57553000  | -4.04058400 | -0.59842600 | H                        | 0.89191500  | 1.64332100  | 3.50126500  |
| C                        | -2.19717300 | -0.09166200 | -1.23705600 | C                        | -2.42201900 | -2.09875600 | -0.21812500 |
| O                        | -1.34072600 | 0.54604200  | -1.87158000 | O                        | -1.40605800 | -1.22472200 | -0.21103600 |
| H                        | -1.88014200 | -0.90725200 | -0.57032800 | H                        | -2.35829700 | -2.94129500 | 0.47093400  |
| H                        | 1.38135800  | -0.34714500 | 0.67857200  | H                        | -1.18326900 | 0.70177300  | -0.05591000 |
| C                        | 4.59117900  | 0.49482000  | -2.38550700 | C                        | 2.19994100  | -3.54111500 | 3.19536700  |
| N                        | 2.33282800  | 0.14255200  | -2.55551100 | N                        | 0.63407000  | -2.58951400 | 1.83343200  |
| C                        | 4.35501500  | -0.35074400 | -3.47435800 | C                        | 0.92757800  | -3.85859000 | 3.68138800  |
| H                        | 5.54633700  | 0.85759800  | -2.02742200 | H                        | 3.15482700  | -3.83927000 | 3.60792700  |
| C                        | 2.95603200  | -0.53410200 | -3.53906400 | C                        | -0.00635600 | -3.24961100 | 2.81311400  |
| H                        | 5.08823200  | -0.78133100 | -4.14337500 | H                        | 0.68839100  | -4.44858900 | 4.55558800  |
| H                        | 2.39347300  | -1.11676000 | -4.25827500 | H                        | -1.08716700 | -3.26024200 | 2.87429000  |
| C                        | 2.95057500  | 1.59455800  | -0.73033400 | C                        | 2.84417400  | -2.12868200 | 1.10647700  |
| H                        | 3.73330300  | 2.14432000  | -0.20010600 | H                        | 3.92760200  | -2.21123400 | 1.18974800  |
| N                        | 1.68714200  | 1.70746600  | -0.38273700 | N                        | 2.29513000  | -1.42398300 | 0.13500800  |
| C                        | 1.30477000  | 2.51675700  | 0.70454000  | C                        | 3.04894600  | -0.85381300 | -0.91431800 |
| C                        | 0.05129100  | 3.15366300  | 0.64756800  | C                        | 2.59381200  | 0.34626700  | -1.48812400 |
| C                        | 2.09186300  | 2.68948000  | 1.86054700  | C                        | 4.21189100  | -1.46152100 | -1.42141400 |
| C                        | -0.39329200 | 3.96834000  | 1.68829300  | C                        | 3.29969200  | 0.94434800  | -2.53076100 |
| C                        | 1.65635000  | 3.50112800  | 2.90921400  | C                        | 4.92796100  | -0.86368700 | -2.45825400 |
| C                        | 0.42285400  | 4.13050300  | 2.80117900  | C                        | 4.45860500  | 0.33088900  | -2.99188300 |
| H                        | -1.35311100 | 4.47199900  | 1.64368100  | H                        | 2.96377800  | 1.87283700  | -2.97932000 |
| H                        | 2.25307200  | 3.63235900  | 3.80573800  | H                        | 5.82314000  | -1.32224100 | -2.86411900 |
| C                        | 3.32502200  | 0.78483500  | -1.82888600 | C                        | 1.99574000  | -2.75160000 | 2.04253300  |
| H                        | -0.56378000 | 3.01200200  | -0.23561800 | H                        | 1.69286900  | 0.81455200  | -1.10034700 |
| H                        | 3.03553200  | 2.16260300  | 1.95775300  | H                        | 4.54422800  | -2.41690000 | -1.02832900 |
| F                        | -0.00772800 | 4.92045500  | 3.82599400  | F                        | 5.14999900  | 0.90981800  | -4.00815200 |
| C                        | -3.62659000 | 0.18606400  | -1.33166600 | C                        | -3.54940600 | -1.94536900 | -1.05813700 |
| C                        | -4.52125700 | -0.59682000 | -0.57965100 | C                        | -4.61802100 | -2.88860300 | -0.99283900 |
| C                        | -4.12030900 | 1.21253400  | -2.16071100 | C                        | -3.67101500 | -0.87204800 | -1.98885500 |
| C                        | -5.89261700 | -0.35777400 | -0.65270700 | C                        | -5.73477800 | -2.76016800 | -1.80492700 |
| H                        | -4.13623200 | -1.38704400 | 0.05950900  | H                        | -4.54849700 | -3.71760400 | -0.29228800 |
| C                        | -5.48911900 | 1.44694600  | -2.22970600 | C                        | -4.79688700 | -0.75828800 | -2.79516600 |
| H                        | -3.41934800 | 1.80654400  | -2.73799400 | H                        | -2.86889200 | -0.14541600 | -2.06272700 |
| C                        | -6.37559200 | 0.66349000  | -1.47672600 | C                        | -5.83930600 | -1.69425600 | -2.71533200 |
| H                        | -6.58209300 | -0.96178200 | -0.07123700 | H                        | -6.53529000 | -3.49199800 | -1.73475700 |
| H                        | -5.87277700 | 2.23718400  | -2.86771600 | H                        | -4.86832100 | 0.06848700  | -3.49735300 |
| H                        | -7.44376600 | 0.85123700  | -1.53436200 | H                        | -6.71550500 | -1.59703500 | -3.34898600 |
| <b>15</b>                |             |             |             | <b>15</b>                |             |             |             |
| Charge=0 Multiplicity =1 |             |             |             | Charge=0 Multiplicity =3 |             |             |             |
| Cu                       | 1.54742400  | 1.00502300  | 0.00818300  | Cu                       | 1.53080600  | 0.95857400  | 0.20435100  |
| O                        | -0.29700400 | 1.10169600  | 0.10067100  | O                        | -0.30024600 | 0.95043000  | 0.51573900  |
| C                        | 4.54873100  | 3.71343200  | -0.13806200 | C                        | 4.33991800  | 3.81720800  | -0.34089100 |
| N                        | 2.49357100  | 2.72265200  | 0.01338200  | N                        | 2.36715000  | 2.73594800  | 0.07491800  |

|   |             |             |             |   |             |             |             |
|---|-------------|-------------|-------------|---|-------------|-------------|-------------|
| C | 3.57998100  | 4.70915900  | 0.00476200  | C | 3.34089300  | 4.77144200  | -0.13532800 |
| H | 5.61900000  | 3.84510400  | -0.22995200 | H | 5.38545900  | 3.99510700  | -0.55703500 |
| C | 2.32948900  | 4.05225100  | 0.09144200  | C | 2.14398700  | 4.05858900  | 0.11384200  |
| H | 3.73828300  | 5.77851100  | 0.03714600  | H | 3.44596800  | 5.84756400  | -0.16197100 |
| H | 1.34594300  | 4.49187600  | 0.19949400  | H | 1.15504800  | 4.45402000  | 0.31087900  |
| C | 4.25740600  | 1.13573300  | -0.21170100 | C | 4.18774300  | 1.23107800  | -0.29722900 |
| H | 5.31277100  | 0.88335400  | -0.31708200 | H | 5.23962300  | 1.04513000  | -0.51654700 |
| N | 3.33876800  | 0.18429700  | -0.18161300 | N | 3.34648100  | 0.22231300  | -0.14034900 |
| C | 3.67348600  | -1.18551600 | -0.15353900 | C | 3.78196300  | -1.11925700 | -0.13571300 |
| C | 2.79365100  | -2.10422800 | -0.75218000 | C | 2.89384800  | -2.11464400 | -0.57921400 |
| C | 4.83359100  | -1.67050000 | 0.47860000  | C | 5.05438500  | -1.50647200 | 0.32505500  |
| C | 3.07037100  | -3.47004400 | -0.74808400 | C | 3.26686400  | -3.45748900 | -0.59380700 |
| C | 5.12371700  | -3.03487700 | 0.48226500  | C | 5.44018600  | -2.84710900 | 0.31037900  |
| C | 4.23731500  | -3.90997000 | -0.13408100 | C | 4.53984400  | -3.79878800 | -0.15246900 |
| H | 2.40046900  | -4.18474500 | -1.21330300 | H | 2.58922600  | -4.22929600 | -0.94204100 |
| H | 6.01102500  | -3.42128700 | 0.97195700  | H | 6.41545800  | -3.15657400 | 0.67038900  |
| C | 3.85361800  | 2.48139500  | -0.12722900 | C | 3.71497700  | 2.55503900  | -0.20420600 |
| H | 1.89426900  | -1.73804100 | -1.23939100 | H | 1.90766800  | -1.82563300 | -0.93210200 |
| H | 5.49790900  | -0.98663700 | 0.99658400  | H | 5.73794000  | -0.76554500 | 0.72641600  |
| F | 4.51391000  | -5.23988500 | -0.12416000 | F | 4.91083600  | -5.10640900 | -0.16031000 |
| H | -2.74418800 | 1.15408600  | 1.15406000  | H | -2.97437400 | 1.32984600  | 1.01199500  |
| H | -5.30106100 | -3.01815000 | 0.01188300  | H | -5.21453200 | -3.11023400 | 0.31357200  |
| C | -4.45369800 | -2.36864600 | -0.24024900 | C | -4.37697000 | -2.45574800 | 0.04255800  |
| C | -4.65801900 | -1.78574400 | -1.64857600 | C | -4.46611000 | -2.10529900 | -1.45237200 |
| C | -4.31965600 | -1.28968800 | 0.88491100  | C | -4.40621100 | -1.21332200 | 0.99320500  |
| C | -5.56105000 | -0.55480700 | -1.58369300 | C | -5.42529800 | -0.93450200 | -1.66398500 |
| H | -5.09307000 | -2.54782000 | -2.30638600 | H | -4.79931500 | -2.98240900 | -2.02003300 |
| C | -4.90722500 | 0.59912100  | -0.78017100 | C | -4.90757100 | 0.36432100  | -0.99244100 |
| H | -6.51722200 | -0.83523200 | -1.12328200 | H | -6.40956200 | -1.19882900 | -1.25609300 |
| H | -3.69098400 | -1.50904700 | -2.08406000 | H | -3.47392700 | -1.84089200 | -1.83571900 |
| H | -3.56439000 | -3.00889100 | -0.24058100 | H | -3.46329300 | -3.03267100 | 0.22410200  |
| H | -5.80073200 | -0.18612600 | -2.58800900 | H | -5.57869000 | -0.73601800 | -2.73116100 |
| C | -3.13898900 | -1.67355400 | 1.79742200  | C | -3.30914000 | -1.38343700 | 2.06176200  |
| H | -3.06051900 | -1.00260700 | 2.65637000  | H | -3.35145400 | -0.58786000 | 2.80977500  |
| H | -3.28065100 | -2.69420100 | 2.16973400  | H | -3.44214800 | -2.34295700 | 2.57348500  |
| H | -2.19870000 | -1.63779000 | 1.23709500  | H | -2.31833400 | -1.37541300 | 1.59523700  |
| C | -5.59786800 | -1.22793500 | 1.75621200  | C | -5.76727600 | -1.09704700 | 1.72132700  |
| H | -5.69101800 | -2.14978400 | 2.34210000  | H | -5.87635600 | -1.92262500 | 2.43421500  |
| H | -5.54361800 | -0.38541100 | 2.45154600  | H | -5.82332700 | -0.15682400 | 2.27753200  |
| H | -6.50646300 | -1.13055200 | 1.15619700  | H | -6.61465300 | -1.14894700 | 1.03292500  |
| C | -4.03208100 | 1.45713300  | -1.71713900 | C | -3.98377400 | 1.12231200  | -1.96885200 |
| H | -4.65308800 | 1.97143000  | -2.45952300 | H | -4.55145000 | 1.48282200  | -2.83422000 |
| H | -3.48967400 | 2.21451400  | -1.14375900 | H | -3.53353100 | 1.98866100  | -1.47504000 |
| H | -3.29839600 | 0.83777500  | -2.24248100 | H | -3.17673600 | 0.47504800  | -2.32660000 |



|           |                 |             |             |           |                 |             |             |
|-----------|-----------------|-------------|-------------|-----------|-----------------|-------------|-------------|
| C         | -6.00283400     | 1.50246500  | -0.17310200 | C         | -6.09672000     | 1.28208400  | -0.63550400 |
| H         | -5.56474300     | 2.36375200  | 0.33528500  | H         | -5.75047800     | 2.22946400  | -0.21746200 |
| H         | -6.65036500     | 1.86715500  | -0.97913000 | H         | -6.66927200     | 1.49349100  | -1.54612400 |
| H         | -6.62958500     | 0.96784400  | 0.54365800  | H         | -6.77432500     | 0.81978100  | 0.08509300  |
| N         | -3.96939800     | -0.00052700 | 0.22293800  | N         | -4.04545600     | -0.02277000 | 0.17126000  |
| O         | -3.70265700     | 0.98858500  | 1.22899500  | O         | -3.92424000     | 1.12384400  | 1.03255200  |
| O         | -0.85807400     | 1.59449300  | 1.15460500  | O         | -1.04326400     | 1.90680700  | 0.89741100  |
| <b>16</b> |                 |             |             | <b>16</b> |                 |             |             |
| Charge=0  | Multiplicity =1 |             |             | Charge=0  | Multiplicity =3 |             |             |
| Cu        | 0.36137100      | 0.86941300  | -0.56413400 | Cu        | 1.61849500      | 1.30269600  | -0.24970600 |
| O         | -1.27950900     | 0.00740800  | -1.05840600 | O         | -0.15161700     | 1.06213100  | -0.54436500 |
| C         | 1.97037200      | 4.49784900  | 0.52365900  | C         | 5.38242300      | 2.54699000  | 0.55384200  |
| N         | 0.48869600      | 2.86035800  | -0.11134600 | N         | 3.14276700      | 2.44777900  | 0.09657000  |
| C         | 0.71818300      | 5.08589900  | 0.33028000  | C         | 4.88674900      | 3.85255100  | 0.45949600  |
| H         | 2.88907200      | 4.98557500  | 0.82511600  | H         | 6.40046700      | 2.24304900  | 0.76030800  |
| C         | -0.15258000     | 4.03948800  | -0.06157500 | C         | 3.50859400      | 3.74119100  | 0.17419800  |
| H         | 0.45585000      | 6.12930400  | 0.44802800  | H         | 5.44052300      | 4.77423200  | 0.57694200  |
| H         | -1.20497800     | 4.11453200  | -0.31134300 | H         | 2.79061800      | 4.53741700  | 0.02206300  |
| C         | 2.72438000      | 2.04798100  | 0.25684000  | C         | 4.13569600      | 0.28831800  | 0.27770100  |
| H         | 3.76418900      | 2.25335200  | 0.52237300  | H         | 5.00254800      | -0.35790800 | 0.42550300  |
| N         | 2.34008300      | 0.83241000  | -0.07523100 | N         | 2.94929300      | -0.21820400 | 0.01981900  |
| C         | 3.22638700      | -0.25814800 | -0.01222400 | C         | 2.70644500      | -1.60596100 | -0.00449400 |
| C         | 3.00245100      | -1.34686100 | -0.87612600 | C         | 1.69961600      | -2.09127600 | -0.85841200 |
| C         | 4.30343600      | -0.33452600 | 0.89369500  | C         | 3.41031500      | -2.51714100 | 0.80504100  |
| C         | 3.84164300      | -2.45990800 | -0.86861700 | C         | 1.42456300      | -3.45583600 | -0.93151500 |
| C         | 5.14986700      | -1.44460800 | 0.91013100  | C         | 3.14224700      | -3.88510300 | 0.73642900  |
| C         | 4.90663700      | -2.48582900 | 0.02402500  | C         | 2.15638900      | -4.32924700 | -0.13551500 |
| H         | 3.67806000      | -3.29579800 | -1.54048500 | H         | 0.65717600      | -3.84128300 | -1.59415500 |
| H         | 5.97655200      | -1.51255400 | 1.60953000  | H         | 3.67406200      | -4.59634000 | 1.35934300  |
| C         | 1.80306000      | 3.11937900  | 0.24430400  | C         | 4.28271300      | 1.69223900  | 0.32702600  |
| H         | 2.16231400      | -1.30164400 | -1.56306900 | H         | 1.13717200      | -1.39081900 | -1.46820400 |
| H         | 4.46906000      | 0.46249700  | 1.61116500  | H         | 4.15126100      | -2.15927800 | 1.51254700  |
| F         | 5.72817100      | -3.57471200 | 0.04237100  | F         | 1.88820100      | -5.66287800 | -0.20021000 |
| H         | -1.65579300     | -0.62461900 | -2.80463600 | H         | -1.41461500     | 0.39209700  | -1.76922800 |
| H         | -4.10613500     | 1.40423800  | 1.45408400  | H         | -5.44136900     | 2.10072900  | 1.49484300  |
| C         | -3.28092500     | 0.94611800  | 0.89667100  | C         | -4.39529800     | 1.84408900  | 1.28896100  |
| C         | -2.26767500     | 0.31897700  | 1.87630900  | C         | -3.95587100     | 0.74971500  | 2.26925400  |
| C         | -3.92075000     | -0.03175800 | -0.12341300 | C         | -4.27784700     | 1.45549900  | -0.22060700 |
| C         | -2.54837000     | -1.16001100 | 2.14581900  | C         | -4.51829600     | -0.60115600 | 1.82878800  |
| H         | -2.27947100     | 0.87530200  | 2.81914400  | H         | -4.30397300     | 1.00256800  | 3.27697800  |
| C         | -2.45446100     | -2.03044900 | 0.87521100  | C         | -3.87225100     | -1.07828600 | 0.51105500  |
| H         | -3.53334500     | -1.27766900 | 2.61293700  | H         | -5.60678200     | -0.51903400 | 1.70895900  |
| H         | -1.25633800     | 0.42735000  | 1.47234100  | H         | -2.86182600     | 0.70084400  | 2.32016400  |
| H         | -2.78527500     | 1.75165700  | 0.34937100  | H         | -3.81252500     | 2.75285800  | 1.47003500  |

|   |             |             |             |   |             |             |             |
|---|-------------|-------------|-------------|---|-------------|-------------|-------------|
| H | -1.82374800 | -1.55658500 | 2.86549900  | H | -4.34849800 | -1.37229200 | 2.58813600  |
| C | -4.15839700 | 0.65360000  | -1.47307100 | C | -3.42214500 | 2.49463000  | -0.96146900 |
| H | -4.65454900 | -0.01250400 | -2.18237600 | H | -3.37749000 | 2.28984900  | -2.03232300 |
| H | -4.80682800 | 1.51845400  | -1.30186100 | H | -3.87167600 | 3.48168300  | -0.81297100 |
| H | -3.21755800 | 1.00835600  | -1.89436900 | H | -2.40168300 | 2.51320900  | -0.56872600 |
| C | -5.27998700 | -0.58194700 | 0.38027200  | C | -5.67159100 | 1.37416800  | -0.88460600 |
| H | -5.99392300 | 0.24720400  | 0.39429000  | H | -6.13835500 | 2.36495200  | -0.87524500 |
| H | -5.66280600 | -1.35012900 | -0.29779200 | H | -5.57901800 | 1.04340000  | -1.92317500 |
| H | -5.23191100 | -0.98888100 | 1.39109000  | H | -6.33702000 | 0.68705100  | -0.35369600 |
| C | -1.00701300 | -2.44370400 | 0.57305900  | C | -2.50920300 | -1.74332900 | 0.78387400  |
| H | -0.70745400 | -3.19702100 | 1.30796100  | H | -2.65901300 | -2.64407800 | 1.38734200  |
| H | -0.93022100 | -2.87669000 | -0.42566500 | H | -2.03041400 | -2.02717800 | -0.15485900 |
| H | -0.31936900 | -1.60061400 | 0.63589500  | H | -1.83280500 | -1.07163600 | 1.31918500  |
| C | -3.31522400 | -3.30502000 | 1.00626400  | C | -4.78894000 | -2.06914900 | -0.23147500 |
| H | -3.20975100 | -3.93391600 | 0.11965700  | H | -4.32369900 | -2.39356000 | -1.16521100 |
| H | -2.96230800 | -3.86620200 | 1.87691900  | H | -4.96094000 | -2.94760500 | 0.39946200  |
| H | -4.37341300 | -3.08073600 | 1.15602200  | H | -5.75969900 | -1.62127700 | -0.46267700 |
| N | -3.00541400 | -1.24138800 | -0.33198600 | N | -3.61227000 | 0.11268500  | -0.37019500 |
| O | -3.11516800 | -1.87721500 | -1.38544600 | O | -3.05235600 | -0.14439800 | -1.50271700 |
| O | -0.98569600 | -0.86289300 | -2.13995100 | O | -0.47439800 | 0.69137200  | -1.87126400 |

### 17

Charge=0 Multiplicity =2

|    |             |             |             |
|----|-------------|-------------|-------------|
| Cu | 0.70895200  | 0.71832700  | 0.88751000  |
| O  | 2.00057400  | 0.12856200  | 2.11440400  |
| C  | 1.19136000  | 3.88729100  | -1.62633400 |
| N  | 1.49370800  | 2.22995100  | -0.07916400 |
| C  | 2.49900400  | 3.95956000  | -1.13927100 |
| H  | 0.72623500  | 4.52721400  | -2.36516300 |
| C  | 2.63620900  | 2.92340300  | -0.18381800 |
| H  | 3.26462100  | 4.67034800  | -1.42011100 |
| H  | 3.48991800  | 2.67589900  | 0.43276000  |
| C  | -0.71456500 | 2.25824700  | -0.95257100 |
| H  | -1.49099800 | 2.68778700  | -1.58779800 |
| N  | -0.98901800 | 1.25056700  | -0.14455600 |
| C  | -2.27229200 | 0.66333100  | -0.14257000 |
| C  | -2.83307800 | 0.25339500  | 1.08035200  |
| C  | -3.00602900 | 0.45484300  | -1.32611000 |
| C  | -4.10056500 | -0.32511800 | 1.12860100  |
| C  | -4.27792800 | -0.12027000 | -1.28838500 |
| C  | -4.80254500 | -0.49750000 | -0.05914500 |
| H  | -4.54444000 | -0.63474600 | 2.06867900  |
| H  | -4.84909100 | -0.28821600 | -2.19518300 |
| C  | 0.58244400  | 2.80341600  | -0.95141500 |
| H  | -2.26823400 | 0.39893800  | 1.99459100  |

### TS17-18

Charge=0 Multiplicity =2

|    |             |             |             |
|----|-------------|-------------|-------------|
| Cu | -0.66001300 | 0.66534700  | -0.82962100 |
| O  | -2.25485000 | 0.08791400  | -2.00017000 |
| C  | -0.87312600 | 4.19079600  | 1.14915600  |
| N  | -1.31859200 | 2.30762300  | -0.06315800 |
| C  | -2.21496500 | 4.21497400  | 0.75527500  |
| H  | -0.34563100 | 4.93254800  | 1.73470100  |
| C  | -2.44406500 | 3.03669500  | 0.00730600  |
| H  | -2.94634800 | 4.98214900  | 0.97053100  |
| H  | -3.35550400 | 2.70007300  | -0.46964100 |
| C  | 0.93630700  | 2.38603600  | 0.65693800  |
| H  | 1.77162900  | 2.87033400  | 1.16470700  |
| N  | 1.10788900  | 1.23718700  | 0.02951100  |
| C  | 2.34301900  | 0.55667200  | 0.07170100  |
| C  | 2.78179100  | -0.12931200 | -1.07481800 |
| C  | 3.14305400  | 0.52743900  | 1.22958200  |
| C  | 4.00296800  | -0.80167700 | -1.07892700 |
| C  | 4.36947900  | -0.13936600 | 1.23300900  |
| C  | 4.77812900  | -0.78887200 | 0.07524400  |
| H  | 4.35467700  | -1.32700600 | -1.96034700 |
| H  | 4.99278700  | -0.17108600 | 2.12020200  |
| C  | -0.33390000 | 2.99235600  | 0.62980800  |
| H  | 2.15338300  | -0.13313700 | -1.95870000 |

|   |             |             |             |   |             |             |             |
|---|-------------|-------------|-------------|---|-------------|-------------|-------------|
| H | -2.57336400 | 0.72296800  | -2.28501500 | H | 2.79803800  | 1.00850800  | 2.13948000  |
| F | -6.03913100 | -1.06485800 | -0.01719900 | F | 5.96969200  | -1.44532700 | 0.07562700  |
| H | 3.85678700  | 0.43836800  | 2.13210800  | H | -3.25666500 | -1.00943000 | -0.76340300 |
| O | 3.11029400  | 0.98960100  | 2.41713900  | O | -3.48483000 | -0.22665000 | -1.30102300 |
| C | -0.25678800 | -2.33715500 | 0.58912800  | C | -0.06829900 | -2.29143500 | -0.91770000 |
| H | -1.08764500 | -1.99247700 | -0.02891500 | H | 0.92621300  | -2.22747800 | -0.46087100 |
| H | -0.60444000 | -3.18124000 | 1.19460700  | H | -0.05610700 | -3.12763200 | -1.62933200 |
| O | 0.01914100  | -1.22739000 | 1.48539600  | O | -0.30662900 | -1.09183300 | -1.65564200 |
| H | 0.79542000  | -1.42639700 | 2.04317900  | H | -1.49343500 | -0.79754500 | -1.99306500 |
| C | 0.93467900  | -2.73016800 | -0.24789800 | C | -1.11654600 | -2.53611400 | 0.15007600  |
| C | 1.29161100  | -1.97695900 | -1.37674300 | C | -0.95634800 | -2.01772200 | 1.44436800  |
| C | 1.71765900  | -3.83799200 | 0.10336800  | C | -2.29556000 | -3.23779600 | -0.15158000 |
| C | 2.41360600  | -2.31907600 | -2.13249100 | C | -1.95173900 | -2.18581300 | 2.41069900  |
| H | 0.68819000  | -1.11949900 | -1.66418900 | H | -0.04321100 | -1.48395700 | 1.69673700  |
| C | 2.83969900  | -4.18588600 | -0.65372000 | C | -3.29396400 | -3.40841300 | 0.81357800  |
| H | 1.44548600  | -4.43569400 | 0.97042000  | H | -2.42630600 | -3.66272500 | -1.14447900 |
| C | 3.18997200  | -3.42514000 | -1.77176600 | C | -3.12421400 | -2.87901400 | 2.09658700  |
| H | 2.67973300  | -1.72688900 | -3.00304400 | H | -1.81161400 | -1.77797500 | 3.40755800  |
| H | 3.43597700  | -5.04894200 | -0.37230500 | H | -4.19759500 | -3.95782400 | 0.56559800  |
| H | 4.06081800  | -3.69430400 | -2.36236900 | H | -3.89789400 | -3.01066100 | 2.84709700  |

**18**

Charge=0 Multiplicity =2

|    |             |             |             |
|----|-------------|-------------|-------------|
| Cu | -0.78546800 | -0.60713700 | 0.64303500  |
| O  | -2.52695200 | -0.16155100 | 2.00612500  |
| C  | -1.15914300 | -3.90710500 | -1.67098300 |
| N  | -1.52265100 | -2.13397500 | -0.27563100 |
| C  | -2.51328300 | -3.88162800 | -1.31977500 |
| H  | -0.66014700 | -4.61666500 | -2.31803800 |
| C  | -2.68947500 | -2.77636100 | -0.45777100 |
| H  | -3.28481800 | -4.57048900 | -1.63598700 |
| H  | -3.59620300 | -2.43856300 | 0.02717000  |
| C  | 0.74640500  | -2.29586800 | -0.94198900 |
| H  | 1.56505800  | -2.79040200 | -1.46679800 |
| N  | 0.97398300  | -1.22949400 | -0.20208000 |
| C  | 2.25656900  | -0.64739200 | -0.12340600 |
| C  | 2.69403900  | -0.12549100 | 1.10652500  |
| C  | 3.10626500  | -0.56343600 | -1.24201700 |
| C  | 3.96470700  | 0.43422300  | 1.22852400  |
| C  | 4.38151100  | -0.00779900 | -1.12779300 |
| C  | 4.78831500  | 0.47606300  | 0.10906800  |
| H  | 4.31641900  | 0.83422700  | 2.17338100  |
| H  | 5.04483100  | 0.06551200  | -1.98287400 |
| C  | -0.56370600 | -2.80969400 | -1.01209500 |
| H  | 2.02385200  | -0.15480400 | 1.95884400  |

|   |             |             |             |
|---|-------------|-------------|-------------|
| H | 2.76342400  | -0.91318300 | -2.21076000 |
| F | 6.02849100  | 1.02296800  | 0.22440100  |
| H | -3.46362400 | -0.94135400 | 3.44837500  |
| O | -2.52532300 | -0.98941800 | 3.20366000  |
| C | 0.03271500  | 2.17156200  | 0.93391400  |
| H | 1.02411900  | 2.02656000  | 0.47959300  |
| H | 0.14667600  | 2.93709900  | 1.71566000  |
| O | -0.39270000 | 0.97710800  | 1.56631300  |
| C | -0.93944000 | 2.66189400  | -0.12240600 |
| C | -0.75365200 | 2.33700900  | -1.47378700 |
| C | -2.06863400 | 3.41300000  | 0.23680000  |
| C | -1.67610500 | 2.74284600  | -2.44282200 |
| H | 0.12511600  | 1.76830500  | -1.76954600 |
| C | -2.99264300 | 3.82245600  | -0.72683000 |
| H | -2.22045200 | 3.68103800  | 1.27998300  |
| C | -2.79911900 | 3.48607700  | -2.07066000 |
| H | -1.51546400 | 2.48382400  | -3.48568600 |
| H | -3.85960600 | 4.40736700  | -0.43209800 |
| H | -3.51558800 | 3.80601500  | -2.82183400 |
| H | -1.86290500 | 0.56880800  | 2.21321800  |

**Table S2** Cartesian coordinates all structures considered in this work (H<sub>2</sub>O level)

| <b>0</b>                   |             |             |             | <b>TS1-2</b>               |             |             |             |
|----------------------------|-------------|-------------|-------------|----------------------------|-------------|-------------|-------------|
| Charge=-1 Multiplicity = 2 |             |             |             | Charge=-1 Multiplicity = 2 |             |             |             |
| Cu                         | 1.03380600  | 0.19976600  | -0.00055700 | Cu                         | 0.83643000  | -1.02058900 | -0.12298800 |
| O                          | 5.16973600  | 2.43899800  | 0.33110700  | O                          | -1.07096700 | -0.67765500 | -0.78314800 |
| C                          | 1.40078200  | -3.87701400 | -0.16564700 | C                          | 4.54660000  | -1.63521100 | -1.76538700 |
| N                          | 1.77776000  | -1.62658100 | 0.00229000  | N                          | 2.46494200  | -1.91715600 | -0.85236700 |
| C                          | 2.78168500  | -3.65762900 | -0.08909100 | C                          | 4.25882100  | -3.00329900 | -1.71675400 |
| H                          | 0.88618100  | -4.82635700 | -0.25089200 | H                          | 5.44610400  | -1.16200100 | -2.13935500 |
| C                          | 2.96222700  | -2.25614800 | 0.00968400  | C                          | 2.96776900  | -3.12422500 | -1.14343000 |
| H                          | 3.56643600  | -4.40325300 | -0.10327100 | H                          | 4.89128100  | -3.81904200 | -2.04304300 |
| H                          | 3.88672500  | -1.69642800 | 0.07923900  | H                          | 2.40639800  | -4.02564700 | -0.93084100 |
| C                          | -0.54057500 | -2.15424800 | -0.12906600 | C                          | 3.09630600  | 0.37050800  | -0.97529200 |
| H                          | -1.34189600 | -2.88970600 | -0.23492100 | H                          | 3.82455700  | 1.15582600  | -1.19077000 |
| N                          | -0.79976900 | -0.86871700 | -0.04827400 | N                          | 1.93348600  | 0.66306200  | -0.43726100 |
| C                          | -2.12263700 | -0.38931300 | -0.00064100 | C                          | 1.56326100  | 1.98606700  | -0.13810000 |
| C                          | -2.36670000 | 0.93879000  | -0.40294100 | C                          | 0.81078500  | 2.21976000  | 1.02837600  |
| C                          | -3.20786700 | -1.16343400 | 0.46009000  | C                          | 1.89986500  | 3.07479000  | -0.96350600 |
| C                          | -3.66084500 | 1.45881900  | -0.39479800 | C                          | 0.43079600  | 3.51443600  | 1.37922800  |
| C                          | -4.50614400 | -0.64898500 | 0.46805500  | C                          | 1.52395900  | 4.37488300  | -0.61701500 |
| C                          | -4.70886900 | 0.65242300  | 0.02996800  | C                          | 0.79970200  | 4.56823900  | 0.55142800  |
| H                          | -3.85259000 | 2.48095500  | -0.70420000 | H                          | -0.14304600 | 3.70568500  | 2.27981500  |
| H                          | -5.34450600 | -1.23807700 | 0.82582400  | H                          | 1.77012600  | 5.22232600  | -1.24847600 |
| C                          | 0.80120400  | -2.59753400 | -0.10404000 | C                          | 3.41419600  | -0.98211600 | -1.22450300 |

|                            |             |             |             |                            |             |             |             |
|----------------------------|-------------|-------------|-------------|----------------------------|-------------|-------------|-------------|
| H                          | -1.52648700 | 1.56136700  | -0.69357600 | H                          | 0.54003300  | 1.37388200  | 1.65370900  |
| H                          | -3.04270800 | -2.16518500 | 0.84307100  | H                          | 2.43288300  | 2.90372000  | -1.89374000 |
| F                          | -5.98144700 | 1.16087100  | 0.03986800  | F                          | 0.42695800  | 5.84061900  | 0.89063400  |
| O                          | 2.13852300  | 3.64080700  | -0.06079700 | O                          | -0.96436700 | -2.81681300 | 2.72791500  |
| C                          | 1.76166800  | 2.46939200  | -0.03745700 | C                          | -0.38580800 | -2.13649400 | 1.88194900  |
| O                          | 2.57140900  | 1.41419600  | 0.07607800  | O                          | -0.42559500 | -2.56065000 | 0.52491600  |
| O                          | 0.49799100  | 2.05848600  | -0.11830700 | O                          | 0.29077000  | -1.05756800 | 2.02114200  |
| H                          | 4.88315200  | 3.35976100  | 0.26730100  | H                          | -1.03204600 | -1.84202000 | -0.03409600 |
| H                          | 4.30755500  | 1.97233600  | 0.26130400  | C                          | -1.92278700 | 0.37226500  | -0.38815300 |
|                            |             |             |             | H                          | -1.60101600 | 1.31274200  | -0.86324100 |
|                            |             |             |             | H                          | -1.88529600 | 0.53055800  | 0.70272900  |
|                            |             |             |             | C                          | -3.35870400 | 0.08195700  | -0.79024100 |
|                            |             |             |             | C                          | -4.21424900 | -0.61998500 | 0.07118100  |
|                            |             |             |             | C                          | -3.84822400 | 0.47344200  | -2.04419100 |
|                            |             |             |             | C                          | -5.52430600 | -0.92323700 | -0.30934100 |
|                            |             |             |             | H                          | -3.84629300 | -0.93537700 | 1.04468300  |
|                            |             |             |             | C                          | -5.15780400 | 0.17532800  | -2.43040800 |
|                            |             |             |             | H                          | -3.19106700 | 1.01262000  | -2.72259400 |
|                            |             |             |             | C                          | -6.00119600 | -0.52541800 | -1.56227200 |
|                            |             |             |             | H                          | -6.17148100 | -1.46961700 | 0.37207300  |
|                            |             |             |             | H                          | -5.52007800 | 0.48847600  | -3.40678000 |
|                            |             |             |             | H                          | -7.02048800 | -0.75908000 | -1.85953800 |
|                            |             |             |             | O                          | -0.17564800 | -1.00796300 | 4.90411700  |
|                            |             |             |             | H                          | 0.21871800  | -0.69164300 | 4.07228700  |
|                            |             |             |             | H                          | -0.63482500 | -1.79619600 | 4.56458000  |
| <b>TS3-4</b>               |             |             |             | <b>TS5-6</b>               |             |             |             |
| Charge=-1 Multiplicity = 2 |             |             |             | Charge=-1 Multiplicity = 2 |             |             |             |
| Cu                         | 0.98496200  | 0.00114900  | 0.63940700  | Cu                         | -0.19498400 | 0.59049000  | 0.47304600  |
| O                          | 0.27390800  | 0.88697900  | 2.31102900  | O                          | -0.58694100 | 0.58502600  | 2.81808600  |
| C                          | 2.02352700  | -3.61680000 | -0.99470600 | C                          | -0.06049800 | 4.50492200  | -0.73223800 |
| N                          | 2.06071200  | -1.54452300 | -0.01892800 | N                          | -0.66509300 | 2.45139200  | 0.06224200  |
| C                          | 3.35118100  | -3.27600800 | -0.71411400 | C                          | -1.39227900 | 4.56555000  | -0.29407100 |
| H                          | 1.65797300  | -4.52580900 | -1.45626600 | H                          | 0.53077600  | 5.30391500  | -1.16225000 |
| C                          | 3.32026100  | -1.99028400 | -0.11799800 | C                          | -1.71887000 | 3.27727400  | 0.18578100  |
| H                          | 4.23655900  | -3.86586400 | -0.91444000 | H                          | -2.05152400 | 5.42399000  | -0.31688400 |
| H                          | 4.15147400  | -1.38661600 | 0.22487000  | H                          | -2.65047900 | 2.92135700  | 0.60585600  |
| C                          | -0.14279300 | -2.24412800 | -0.57765600 | C                          | 1.58243400  | 2.48906900  | -0.70172500 |
| H                          | -0.84023000 | -2.95072100 | -1.03407200 | H                          | 2.43402300  | 3.00679600  | -1.15065400 |
| N                          | -0.56398200 | -1.10106100 | -0.08805100 | N                          | 1.66624800  | 1.22474700  | -0.37334800 |
| C                          | -1.91649500 | -0.72599400 | -0.09019600 | C                          | 2.89439900  | 0.53905100  | -0.50846100 |
| C                          | -2.22493100 | 0.63292100  | -0.29579000 | C                          | 2.89452700  | -0.78718300 | -0.97141200 |
| C                          | -2.96458600 | -1.63898900 | 0.12666800  | C                          | 4.12083700  | 1.14682200  | -0.18007900 |
| C                          | -3.55046800 | 1.06472300  | -0.31074100 | C                          | 4.09014500  | -1.48316700 | -1.14210100 |
| C                          | -4.29518100 | -1.21325300 | 0.11035900  | C                          | 5.32480000  | 0.45998900  | -0.35239400 |

|                           |             |             |             |                           |             |             |             |
|---------------------------|-------------|-------------|-------------|---------------------------|-------------|-------------|-------------|
| C                         | -4.56087700 | 0.13104900  | -0.11111500 | C                         | 5.28314200  | -0.84048800 | -0.83826700 |
| H                         | -3.79964000 | 2.10715000  | -0.47913300 | H                         | 4.07724100  | -2.51065800 | -1.48912900 |
| H                         | -5.11267600 | -1.90506900 | 0.28546200  | H                         | 6.27669600  | 0.91291700  | -0.09481900 |
| C                         | 1.24134900  | -2.52485300 | -0.55148000 | C                         | 0.36401600  | 3.18067900  | -0.49450200 |
| H                         | -1.40960200 | 1.33271300  | -0.46088800 | H                         | 1.95563700  | -1.28371000 | -1.17906600 |
| H                         | -2.73984100 | -2.67957200 | 0.33937900  | H                         | 4.13320000  | 2.14825800  | 0.23948500  |
| F                         | -5.86398000 | 0.55116700  | -0.12148300 | F                         | 6.46460000  | -1.51282000 | -1.00283300 |
| O                         | 2.69001400  | 3.37496600  | 0.05090400  | O                         | 1.23742700  | -3.14769700 | 1.18950400  |
| C                         | 2.01484900  | 2.35311100  | 0.18825600  | C                         | 0.78720400  | -2.01834500 | 1.43639300  |
| O                         | 2.32083900  | 1.48212900  | 1.26461400  | O                         | 0.86835200  | -1.54740500 | 2.68993900  |
| O                         | 1.03875400  | 1.91904800  | -0.51992700 | O                         | 0.22568000  | -1.27041100 | 0.52196200  |
| H                         | 1.42852300  | 1.45994400  | 1.94856100  | H                         | 0.36059500  | -0.68163200 | 2.80189100  |
| H                         | -0.48683400 | 1.45609900  | 2.13830000  | O                         | -2.22013000 | 0.26914300  | 1.11984200  |
| O                         | 1.19521400  | 4.22279000  | -2.30750300 | H                         | -0.48394400 | 1.41655000  | 3.29261300  |
| H                         | 1.88515200  | 4.32562200  | -1.62689000 | C                         | -2.85523400 | -0.99204200 | 1.09011900  |
| H                         | 0.83909100  | 3.36114400  | -2.02733600 | H                         | -2.12012300 | -1.79000400 | 0.91215400  |
|                           |             |             |             | H                         | -3.31512200 | -1.19213400 | 2.07201600  |
|                           |             |             |             | C                         | -3.93364600 | -1.07150700 | 0.02501900  |
|                           |             |             |             | C                         | -4.64219200 | -2.27031900 | -0.15401000 |
|                           |             |             |             | C                         | -4.24800200 | 0.02029200  | -0.79180900 |
|                           |             |             |             | C                         | -5.64405600 | -2.37480500 | -1.12004800 |
|                           |             |             |             | H                         | -4.40066500 | -3.13098800 | 0.46697900  |
|                           |             |             |             | C                         | -5.24974800 | -0.08238600 | -1.76379600 |
|                           |             |             |             | H                         | -3.69474500 | 0.94321500  | -0.65984100 |
|                           |             |             |             | C                         | -5.95380300 | -1.27698200 | -1.93157500 |
|                           |             |             |             | H                         | -6.17948500 | -3.31297500 | -1.24396300 |
|                           |             |             |             | H                         | -5.47645500 | 0.77510400  | -2.39276300 |
|                           |             |             |             | H                         | -6.73061100 | -1.35625600 | -2.68781000 |
|                           |             |             |             | H                         | -1.63530100 | 0.43635900  | 2.07360600  |
|                           |             |             |             | O                         | 1.42835300  | -3.88337100 | -1.44840600 |
|                           |             |             |             | H                         | 0.58765900  | -3.57783500 | -1.80895700 |
|                           |             |             |             | H                         | 1.36670300  | -3.65489600 | -0.48589500 |
| <b>8</b>                  |             |             |             | <b>TS9-10</b>             |             |             |             |
| Charge=0 Multiplicity = 2 |             |             |             | Charge=0 Multiplicity = 2 |             |             |             |
| Cu                        | -1.23260600 | 0.53081700  | -0.06940800 | Cu                        | -0.22538400 | -0.33088200 | 0.20237300  |
| C                         | -3.22641300 | -2.93988700 | 0.34925500  | C                         | -1.17670800 | -4.09203900 | -0.94851400 |
| N                         | -2.64265100 | -0.75350900 | 0.05255800  | N                         | -1.24940500 | -1.89810200 | -0.32354000 |
| C                         | -4.39130800 | -2.18279700 | 0.17260800  | C                         | -2.50884400 | -3.66494900 | -0.95439500 |
| H                         | -3.15455300 | -4.00736600 | 0.51033500  | H                         | -0.79903600 | -5.07448900 | -1.19998700 |
| C                         | -3.98581000 | -0.84429600 | -0.00658500 | C                         | -2.50826600 | -2.30760300 | -0.56286800 |
| H                         | -5.41173200 | -2.54056300 | 0.17979700  | H                         | -3.38330000 | -4.24993100 | -1.20493700 |
| H                         | -4.60402800 | 0.03072300  | -0.16048100 | H                         | -3.35005700 | -1.63792600 | -0.44745400 |
| C                         | -0.74715400 | -2.14957600 | 0.32434300  | C                         | 0.96608300  | -2.73473200 | -0.37069100 |
| H                         | -0.26841600 | -3.11948900 | 0.46163800  | H                         | 1.69903400  | -3.52735500 | -0.52183900 |

|                           |             |             |             |                           |             |             |             |
|---------------------------|-------------|-------------|-------------|---------------------------|-------------|-------------|-------------|
| N                         | -0.01587600 | -1.05955600 | 0.22139500  | N                         | 1.35499700  | -1.53430400 | 0.01666200  |
| C                         | 1.38841600  | -1.10403000 | 0.08399300  | C                         | 2.73130700  | -1.22779100 | 0.14986300  |
| C                         | 2.17430800  | -0.14555600 | 0.74399700  | C                         | 3.16664500  | -0.48250500 | 1.25629000  |
| C                         | 2.01153300  | -2.06991100 | -0.72858400 | C                         | 3.67111700  | -1.64942300 | -0.80598500 |
| C                         | 3.56066300  | -0.15757100 | 0.61684500  | C                         | 4.51729900  | -0.18799200 | 1.42658900  |
| C                         | 3.40024900  | -2.10137800 | -0.84649900 | C                         | 5.02708700  | -1.36280800 | -0.64344600 |
| C                         | 4.14717300  | -1.14313100 | -0.16909300 | C                         | 5.42346300  | -0.63931400 | 0.47399700  |
| H                         | 4.16687100  | 0.59719300  | 1.10408400  | H                         | 4.86797000  | 0.38594300  | 2.27718600  |
| H                         | 3.89948700  | -2.83633200 | -1.46848400 | H                         | 5.76370400  | -1.67673500 | -1.37497400 |
| C                         | -2.15163100 | -2.03206800 | 0.26755900  | C                         | -0.40826100 | -2.97485900 | -0.55656300 |
| H                         | 1.70315000  | 0.61737600  | 1.35147600  | H                         | 2.44050400  | -0.13104900 | 1.98079100  |
| H                         | 1.40927800  | -2.78001100 | -1.28674100 | H                         | 3.33935400  | -2.18091900 | -1.69238600 |
| F                         | 5.49853100  | -1.16411000 | -0.29827100 | F                         | 6.74269100  | -0.35212400 | 0.63458900  |
| O                         | -0.60424700 | 4.22530700  | -0.49104800 | O                         | 0.71511900  | 3.76135700  | -0.30452100 |
| C                         | -0.82407900 | 3.03995700  | -0.39213100 | C                         | 1.25587800  | 2.67610000  | -0.11269900 |
| O                         | -2.13293500 | 2.51989700  | -0.52468900 | O                         | 2.47309000  | 2.34932700  | -0.55206500 |
| O                         | -0.03642000 | 2.04043200  | -0.15938300 | O                         | 0.70062800  | 1.68536300  | 0.57407000  |
| H                         | -2.77708900 | 3.23282900  | -0.65750900 | H                         | 2.84264100  | 3.13291200  | -1.03065300 |
| O                         | 2.47557200  | 3.05595500  | 1.01432000  | C                         | -2.60841000 | 1.00329800  | 1.48977700  |
| H                         | 1.68613000  | 2.80875900  | 0.50266900  | H                         | -2.58828700 | 1.93032100  | 2.08367700  |
| H                         | 2.46793100  | 4.02037500  | 1.03496000  | O                         | -1.50212300 | 1.03513200  | 0.60631500  |
|                           |             |             |             | H                         | -0.41156900 | 1.74450600  | 0.71720400  |
|                           |             |             |             | H                         | -2.52359800 | 0.17054800  | 2.20291300  |
|                           |             |             |             | C                         | -3.93937400 | 0.90651800  | 0.76563400  |
|                           |             |             |             | C                         | -5.04568300 | 0.33441200  | 1.40839600  |
|                           |             |             |             | C                         | -4.09708000 | 1.41727700  | -0.52898100 |
|                           |             |             |             | C                         | -6.29003600 | 0.27939600  | 0.77485200  |
|                           |             |             |             | H                         | -4.93359300 | -0.07598900 | 2.40990800  |
|                           |             |             |             | C                         | -5.33923700 | 1.35808500  | -1.16657200 |
|                           |             |             |             | H                         | -3.23826900 | 1.84999600  | -1.03176800 |
|                           |             |             |             | C                         | -6.44002900 | 0.79113700  | -0.51728000 |
|                           |             |             |             | H                         | -7.13734800 | -0.16936300 | 1.28580500  |
|                           |             |             |             | H                         | -5.44721600 | 1.75511300  | -2.17221100 |
|                           |             |             |             | H                         | -7.40460800 | 0.74520600  | -1.01466200 |
|                           |             |             |             | O                         | 2.88295500  | 4.81500400  | -1.61740800 |
|                           |             |             |             | H                         | 2.87008500  | 5.10088800  | -2.53852200 |
|                           |             |             |             | H                         | 1.96730900  | 4.87714700  | -1.27562600 |
| <b>11</b>                 |             |             |             | <b>TS12-13</b>            |             |             |             |
| Charge=0 Multiplicity = 2 |             |             |             | Charge=0 Multiplicity = 2 |             |             |             |
| Cu                        | 1.21147000  | 1.04172500  | 0.10335900  | Cu                        | 0.02957800  | 0.42794700  | 0.04177200  |
| C                         | 2.88550300  | -2.63740700 | -0.23177900 | C                         | 0.88124700  | 4.36916800  | -0.38558200 |
| N                         | 2.50127000  | -0.39586800 | -0.00400300 | N                         | -0.16627700 | 2.35243100  | -0.15691800 |
| C                         | 4.11600400  | -1.98054100 | -0.11391400 | C                         | -0.50178200 | 4.58234100  | -0.34749900 |
| H                         | 2.71513000  | -3.69967000 | -0.34903800 | H                         | 1.65964100  | 5.11454400  | -0.48366200 |

|   |             |             |             |   |             |             |             |
|---|-------------|-------------|-------------|---|-------------|-------------|-------------|
| C | 3.83032900  | -0.60465600 | 0.02428700  | C | -1.10560800 | 3.31454300  | -0.20419400 |
| H | 5.10068000  | -2.42793300 | -0.12287700 | H | -1.02094900 | 5.52876600  | -0.41416700 |
| H | 4.52386600  | 0.21754100  | 0.14663300  | H | -2.15924400 | 3.07809800  | -0.13240900 |
| C | 0.48759000  | -1.63288400 | -0.19884200 | C | 2.19289700  | 2.13113100  | -0.20084100 |
| H | -0.06444800 | -2.56585300 | -0.32388600 | H | 3.20253200  | 2.53892900  | -0.26482800 |
| N | -0.14998600 | -0.48501600 | -0.10911900 | N | 2.00680800  | 0.83280600  | -0.07989400 |
| C | -1.55904800 | -0.42623600 | -0.06373100 | C | 3.10985900  | -0.04007100 | 0.09304500  |
| C | -2.22336300 | 0.61067300  | -0.74254500 | C | 3.18585500  | -1.22265300 | -0.66109600 |
| C | -2.31794400 | -1.36607700 | 0.65784600  | C | 4.12510700  | 0.25159800  | 1.02135600  |
| C | -3.61529800 | 0.69086600  | -0.72876900 | C | 4.26678400  | -2.08980200 | -0.50455900 |
| C | -3.71180700 | -1.29570300 | 0.67302700  | C | 5.21309100  | -0.60897300 | 1.17984100  |
| C | -4.33423500 | -0.26873100 | -0.02505300 | C | 5.26155000  | -1.76453600 | 0.41054900  |
| H | -4.14021500 | 1.48092400  | -1.25489400 | H | 4.33916300  | -3.00156900 | -1.08724600 |
| H | -4.30788500 | -2.01117400 | 1.22921000  | H | 6.00192500  | -0.39916700 | 1.89414500  |
| C | 1.89743300  | -1.63275000 | -0.15772400 | C | 1.06597500  | 2.97622300  | -0.26194000 |
| H | -1.63637800 | 1.34944000  | -1.27702900 | H | 2.41172900  | -1.46391500 | -1.38064400 |
| H | -1.81742700 | -2.14021100 | 1.23084800  | H | 4.05201700  | 1.14283500  | 1.63722800  |
| F | -5.69236400 | -0.19182700 | -0.00773600 | F | 6.31535400  | -2.61076400 | 0.56603400  |
| O | 0.15525600  | 2.56542700  | 0.24194900  | O | 0.00804700  | -1.63710600 | 0.25102400  |
| H | -0.67472100 | 2.49667600  | 0.72691200  | H | 0.37607000  | -2.01349900 | 1.06206400  |
| O | 2.63830600  | 2.69099700  | 0.20735800  | O | -1.80719200 | -0.20653700 | 0.32614700  |
| H | 1.81013800  | 3.21958900  | 0.32676800  | C | -2.84807500 | -0.11068200 | -0.63158800 |
| H | 3.05143500  | 2.97255300  | -0.61985000 | H | -2.98384800 | 0.94654800  | -0.90344900 |
|   |             |             |             | H | -2.58521700 | -0.64324600 | -1.55923800 |
|   |             |             |             | H | -1.05796000 | -1.26960400 | 0.36588000  |
|   |             |             |             | C | -4.16139200 | -0.65968600 | -0.10032600 |
|   |             |             |             | C | -5.13857900 | -1.11921700 | -0.99401700 |
|   |             |             |             | C | -4.43555000 | -0.68174200 | 1.27266400  |
|   |             |             |             | C | -6.37151900 | -1.58149700 | -0.52758600 |
|   |             |             |             | H | -4.93370600 | -1.11847000 | -2.06265700 |
|   |             |             |             | C | -5.66692500 | -1.14856600 | 1.74159700  |
|   |             |             |             | H | -3.67489900 | -0.33661600 | 1.96522100  |
|   |             |             |             | C | -6.63968800 | -1.59789600 | 0.84439300  |
|   |             |             |             | H | -7.11772500 | -1.93547900 | -1.23354900 |
|   |             |             |             | H | -5.86611500 | -1.16179100 | 2.80976400  |
|   |             |             |             | H | -7.59559300 | -1.96184200 | 1.21009900  |
|   |             |             |             | O | 0.70535900  | -2.90489000 | -2.17390800 |
|   |             |             |             | H | 0.16449900  | -3.65247900 | -2.45272000 |
|   |             |             |             | H | 0.35884300  | -2.61213700 | -1.30925300 |

**Table S3** Cartesian coordinates all structures considered in this work (2H<sub>2</sub>O level)

| <b>0</b> |                            |             |             | <b>TS1-2</b> |                            |             |             |
|----------|----------------------------|-------------|-------------|--------------|----------------------------|-------------|-------------|
|          | Charge=-1 Multiplicity = 2 |             |             |              | Charge=-1 Multiplicity = 2 |             |             |
| Cu       | 1.05039800                 | -0.13407300 | 0.02776100  | Cu           | 1.09852600                 | -0.78378300 | -0.37293800 |
| O        | 5.05072400                 | 2.78781600  | -0.01274900 | O            | -0.86935600                | -0.97297400 | -0.84985700 |



|   |             |             |             |   |             |             |             |
|---|-------------|-------------|-------------|---|-------------|-------------|-------------|
| C | 1.37370300  | -4.20968900 | -0.11854800 | C | 4.67393900  | -0.21445000 | -2.27726200 |
| N | 1.77840800  | -1.96326400 | 0.03014500  | N | 2.83936200  | -1.13013200 | -1.26044500 |
| C | 2.75733300  | -4.00680100 | -0.04155000 | C | 4.78381100  | -1.60916400 | -2.32232500 |
| H | 0.84787200  | -5.15331100 | -0.19632400 | H | 5.37163400  | 0.51598700  | -2.66757800 |
| C | 2.95529500  | -2.60776400 | 0.04487200  | C | 3.63221400  | -2.12653900 | -1.68011000 |
| H | 3.53251700  | -4.76227400 | -0.04740800 | H | 5.58909400  | -2.19014400 | -2.75324100 |
| H | 3.88690300  | -2.05990100 | 0.11201200  | H | 3.36473300  | -3.16126000 | -1.50543000 |
| C | -0.54412100 | -2.45815900 | -0.11364900 | C | 2.79323900  | 1.24457700  | -1.23104300 |
| H | -1.36176800 | -3.17585100 | -0.21390400 | H | 3.25007900  | 2.21833200  | -1.42111400 |
| N | -0.77747000 | -1.16636000 | -0.05985500 | N | 1.64530900  | 1.15707100  | -0.59888200 |
| C | -2.09146900 | -0.66082200 | -0.03347700 | C | 0.95068700  | 2.30089800  | -0.15822900 |
| C | -2.32613000 | 0.62758700  | -0.55054600 | C | 0.32826800  | 2.26298800  | 1.10278400  |
| C | -3.17494600 | -1.37638800 | 0.51404900  | C | 0.85165300  | 3.46763300  | -0.93723100 |
| C | -3.61165900 | 1.16737200  | -0.56464700 | C | -0.35041000 | 3.37792500  | 1.59228300  |
| C | -4.46578900 | -0.84398000 | 0.50038300  | C | 0.17235800  | 4.58873000  | -0.45420200 |
| C | -4.66012400 | 0.41656400  | -0.04767700 | C | -0.41103500 | 4.52106800  | 0.80423500  |
| H | -3.79702400 | 2.16043700  | -0.96013900 | H | -0.81757400 | 3.35701900  | 2.57094800  |
| H | -5.30464600 | -1.38543200 | 0.92550000  | H | 0.08028700  | 5.49330200  | -1.04636300 |
| C | 0.78989100  | -2.92333400 | -0.07012500 | C | 3.45524900  | 0.05682400  | -1.61454300 |
| H | -1.48467900 | 1.20498000  | -0.91751000 | H | 0.39238600  | 1.36022500  | 1.70062900  |
| H | -3.01045700 | -2.34178000 | 0.98181600  | H | 1.28250100  | 3.49000400  | -1.93355000 |
| F | -5.92375600 | 0.94136900  | -0.05845700 | F | -1.07739300 | 5.61869000  | 1.27638300  |
| O | 2.20320500  | 3.29107100  | 0.01433400  | O | 0.20505100  | -3.24771300 | 2.43128000  |
| C | 1.81706000  | 2.10955900  | 0.02483500  | C | 0.44858000  | -2.36156700 | 1.60329900  |
| O | 2.61443400  | 1.05586100  | 0.03921100  | O | 0.36845200  | -2.68757600 | 0.23532300  |
| O | 0.54026900  | 1.74033900  | 0.02317100  | O | 0.78862600  | -1.14590800 | 1.79456000  |
| H | 4.20372400  | 3.27445200  | -0.00408400 | H | -0.45326900 | -2.10155300 | -0.21203300 |
| H | 4.71430700  | 1.87868200  | 0.00117100  | C | -1.94240000 | -0.22834400 | -0.34535700 |
| O | -0.31933900 | 4.63625100  | 0.25169500  | H | -1.76645900 | 0.84771200  | -0.50926300 |
| H | 0.63698800  | 4.46025700  | 0.14150400  | H | -2.04667700 | -0.35717100 | 0.74612800  |
| H | -0.64664900 | 3.72732200  | 0.31757000  | C | -3.27158300 | -0.58302700 | -1.00031600 |
|   |             |             |             | C | -4.46073500 | -0.00585800 | -0.52836700 |
|   |             |             |             | C | -3.33885500 | -1.46673600 | -2.08284500 |
|   |             |             |             | C | -5.68763200 | -0.30044600 | -1.12546800 |
|   |             |             |             | H | -4.42350300 | 0.67800400  | 0.31782100  |
|   |             |             |             | C | -4.56717500 | -1.76550700 | -2.68296900 |
|   |             |             |             | H | -2.41623800 | -1.91230900 | -2.43968500 |
|   |             |             |             | C | -5.74619700 | -1.18427400 | -2.20957600 |
|   |             |             |             | H | -6.59814300 | 0.15549600  | -0.74387900 |
|   |             |             |             | H | -4.60165600 | -2.45644100 | -3.52208800 |
|   |             |             |             | H | -6.70038200 | -1.41816000 | -2.67497900 |
|   |             |             |             | O | 0.21891400  | 0.08675100  | 4.32317900  |
|   |             |             |             | H | 0.48597600  | -0.29027800 | 3.46127100  |
|   |             |             |             | H | 0.03063800  | -0.71368500 | 4.84437300  |

|                            |                            |             |             |            |             |             |             |
|----------------------------|----------------------------|-------------|-------------|------------|-------------|-------------|-------------|
|                            | O                          | -0.24764800 | -2.71997400 | 5.08199700 |             |             |             |
|                            | H                          | 0.00395700  | -2.92033000 | 4.14463400 |             |             |             |
|                            | H                          | -1.17695700 | -2.97104500 | 5.13804700 |             |             |             |
| <b>TS3-4</b>               | <b>TS5-6</b>               |             |             |            |             |             |             |
| Charge=-1 Multiplicity = 2 | Charge=-1 Multiplicity = 2 |             |             |            |             |             |             |
| Cu                         | -0.68031600                | 0.27473600  | 0.52643300  | Cu         | -0.11738600 | 0.74197200  | -0.06796600 |
| O                          | -0.27976800                | -0.94910000 | 2.04688700  | O          | -0.75363900 | -0.02000100 | 2.11862800  |
| C                          | -0.77447100                | 4.09952000  | -0.91189300 | C          | 0.19993000  | 4.81615800  | -0.22732900 |
| N                          | -1.32756100                | 2.03595700  | -0.09010600 | N          | -0.52775100 | 2.65422500  | -0.13624500 |
| C                          | -2.16091700                | 4.04306000  | -0.73343200 | C          | -1.20288900 | 4.81270000  | -0.20926300 |
| H                          | -0.19009700                | 4.93090300  | -1.28594800 | H          | 0.85774600  | 5.67538400  | -0.26889800 |
| C                          | -2.45249600                | 2.75137200  | -0.22992000 | C          | -1.60388200 | 3.45881600  | -0.15331900 |
| H                          | -2.88176900                | 4.82291800  | -0.94219800 | H          | -1.86057200 | 5.67207200  | -0.23628700 |
| H                          | -3.41702200                | 2.32702200  | 0.01927400  | H          | -2.60205700 | 3.04247700  | -0.12880400 |
| C                          | 1.00734200                 | 2.25884500  | -0.46954700 | C          | 1.83933100  | 2.79570300  | -0.17958300 |
| H                          | 1.87593900                 | 2.81360600  | -0.83189500 | H          | 2.76853100  | 3.37058600  | -0.20268700 |
| N                          | 1.12874300                 | 1.02360300  | -0.03951100 | N          | 1.86681100  | 1.48593300  | -0.17279100 |
| C                          | 2.36350700                 | 0.35705300  | 0.00817000  | C          | 3.10290800  | 0.80844400  | -0.06993600 |
| C                          | 2.39415700                 | -1.01016600 | -0.32676800 | C          | 3.35092200  | -0.31734600 | -0.87393500 |
| C                          | 3.55713000                 | 0.99214800  | 0.39558500  | C          | 4.09318100  | 1.23460100  | 0.83454800  |
| C                          | 3.59333700                 | -1.72081000 | -0.29996200 | C          | 4.57459800  | -0.98202100 | -0.80206200 |
| C                          | 4.76279600                 | 0.28713100  | 0.42251500  | C          | 5.32245300  | 0.57637100  | 0.91036300  |
| C                          | 4.75634600                 | -1.05587800 | 0.07145800  | C          | 5.53890900  | -0.51757800 | 0.08331700  |
| H                          | 3.63038200                 | -2.77143000 | -0.56791900 | H          | 4.76766000  | -1.85356500 | -1.41777100 |
| H                          | 5.68928300                 | 0.76238900  | 0.72769500  | H          | 6.09081800  | 0.88900500  | 1.60980800  |
| C                          | -0.27882800                | 2.84002300  | -0.50349300 | C          | 0.59027900  | 3.46127000  | -0.18067300 |
| H                          | 1.46952100                 | -1.49496300 | -0.62817100 | H          | 2.58623300  | -0.67777300 | -1.55139000 |
| H                          | 3.53893100                 | 2.03246500  | 0.70543600  | H          | 3.88881100  | 2.06604100  | 1.50226600  |
| F                          | 5.93507800                 | -1.74942200 | 0.10245700  | F          | 6.74132700  | -1.16484000 | 0.15655100  |
| O                          | -3.28307600                | -2.38051100 | -0.47741600 | O          | 1.07150400  | -3.15228900 | -0.45537600 |
| C                          | -2.32408800                | -1.65140800 | -0.18437800 | C          | 0.62577800  | -2.12770000 | 0.10167900  |
| O                          | -2.40621200                | -0.88949800 | 1.00043000  | O          | 0.46533200  | -2.14099000 | 1.43071700  |
| O                          | -1.23372700                | -1.46547900 | -0.82107000 | O          | 0.31041000  | -1.05882500 | -0.56659700 |
| H                          | -1.51434900                | -1.16276100 | 1.65421700  | H          | 0.02030100  | -1.28992700 | 1.78450200  |
| H                          | 0.30637500                 | -1.67878000 | 1.80922900  | O          | -2.16726300 | 0.31545400  | 0.24381100  |
| O                          | -1.78443100                | -3.37480000 | -2.89800800 | H          | -0.75267100 | 0.45935400  | 2.95311900  |
| H                          | -2.60485300                | -3.45085700 | -2.38554400 | C          | -2.77357300 | -0.85337500 | -0.27481700 |
| H                          | -1.33707400                | -2.67760100 | -2.38075400 | H          | -2.49823700 | -0.95730700 | -1.33257600 |
| O                          | -5.27799700                | -1.90862000 | 1.49188800  | H          | -2.38717500 | -1.74777400 | 0.23452400  |
| H                          | -4.67275200                | -1.28640400 | 1.91732600  | C          | -4.28982500 | -0.83347900 | -0.15851100 |
| H                          | -4.72851700                | -2.20727400 | 0.73618400  | C          | -5.03090900 | -1.93176300 | -0.62250300 |
| H                          | -2.54483857                | -5.95972918 | -0.87365161 | C          | -4.97588800 | 0.25056800  | 0.39891000  |
| C                          | -2.90151141                | -6.46412737 | -0.00000010 | C          | -6.42367400 | -1.94448500 | -0.53518700 |
| H                          | -2.54485699                | -7.47293737 | -0.00000010 | H          | -4.50983200 | -2.78453100 | -1.05337900 |

|   |             |             |             |   |             |             |             |
|---|-------------|-------------|-------------|---|-------------|-------------|-------------|
| H | -2.54483857 | -5.95972918 | 0.87365140  | C | -6.37235500 | 0.24037400  | 0.48924100  |
| H | -3.97151141 | -6.46411418 | -0.00000010 | H | -4.40126900 | 1.09688200  | 0.75958700  |
| H | 13.14373350 | -6.46411418 | -0.00000010 | C | -7.10265600 | -0.85491100 | 0.02272300  |
| C | 14.21373350 | -6.46412737 | -0.00000010 | H | -6.97952000 | -2.80488300 | -0.89939100 |
| H | 14.57038792 | -7.47293737 | -0.00000010 | H | -6.88890100 | 1.09139200  | 0.92658000  |
| H | 14.57040634 | -5.95972918 | 0.87365140  | H | -8.18724000 | -0.86298500 | 0.09321300  |
| H | 14.57040634 | -5.95972918 | -0.87365161 | H | -1.73139800 | 0.14971200  | 1.25985200  |
|   |             |             |             | O | 1.48770900  | -2.48644700 | -3.13973800 |
|   |             |             |             | H | 0.86043900  | -1.75261400 | -3.13068800 |
|   |             |             |             | H | 1.38860100  | -2.84966800 | -2.22958400 |
|   |             |             |             | O | 1.31281900  | -5.13476100 | 1.58503200  |
|   |             |             |             | H | 1.03807700  | -4.47623700 | 2.23657700  |
|   |             |             |             | H | 1.29969600  | -4.60157300 | 0.76294400  |

### 8

Charge=0 Multiplicity = 2

|    |             |             |             |
|----|-------------|-------------|-------------|
| Cu | -1.07083000 | -0.08413300 | -0.00287800 |
| C  | -1.82989000 | -4.02792300 | 0.31108200  |
| N  | -1.99013800 | -1.76216400 | 0.09289700  |
| C  | -3.18270300 | -3.67988100 | 0.20687300  |
| H  | -1.41337800 | -5.02025100 | 0.42300400  |
| C  | -3.23511900 | -2.27698300 | 0.07495800  |
| H  | -4.03358200 | -4.34686900 | 0.22980800  |
| H  | -4.10627000 | -1.64161000 | -0.01989100 |
| C  | 0.26164100  | -2.47874100 | 0.25620000  |
| H  | 1.03212500  | -3.24532000 | 0.34256600  |
| N  | 0.59684900  | -1.20757800 | 0.18411100  |
| C  | 1.93980900  | -0.79342300 | 0.03621500  |
| C  | 2.38727300  | 0.34705700  | 0.72181000  |
| C  | 2.82761700  | -1.48440500 | -0.80906500 |
| C  | 3.70247300  | 0.78457900  | 0.58694700  |
| C  | 4.15133600  | -1.06453300 | -0.93611800 |
| C  | 4.56210000  | 0.06275500  | -0.23295300 |
| H  | 4.04207300  | 1.67918000  | 1.09584900  |
| H  | 4.84990000  | -1.58261500 | -1.58413600 |
| C  | -1.10690600 | -2.82057800 | 0.23536700  |
| H  | 1.70646600  | 0.90047900  | 1.35688500  |
| H  | 2.47698800  | -2.33454800 | -1.38598100 |
| F  | 5.84747700  | 0.48068000  | -0.37013200 |
| O  | -1.74034500 | 3.58819700  | -0.27482800 |
| C  | -1.52786400 | 2.38556200  | -0.21822000 |
| O  | -2.55659800 | 1.45061900  | -0.31707100 |
| O  | -0.41646900 | 1.74845600  | -0.06122300 |
| H  | -3.44450200 | 1.89857500  | -0.40910200 |
| O  | 1.65155200  | 3.48073900  | 1.10434200  |

### TS9-10

Charge=0 Multiplicity = 2

|    |             |             |             |
|----|-------------|-------------|-------------|
| Cu | -0.34602000 | -0.56970500 | 0.23500000  |
| C  | -1.43593800 | -4.13328600 | -1.34486300 |
| N  | -1.42347800 | -2.02220800 | -0.47755500 |
| C  | -2.74666400 | -3.64407900 | -1.32925700 |
| H  | -1.09751400 | -5.09848300 | -1.69837400 |
| C  | -2.69327200 | -2.34062600 | -0.78720300 |
| H  | -3.64021500 | -4.15419300 | -1.66245400 |
| H  | -3.50558700 | -1.64670500 | -0.61553900 |
| C  | 0.75179000  | -2.95391400 | -0.57438100 |
| H  | 1.45172100  | -3.75939500 | -0.79747300 |
| N  | 1.18442500  | -1.82388900 | -0.04814800 |
| C  | 2.56809300  | -1.60207700 | 0.15373700  |
| C  | 3.00210000  | -1.01235900 | 1.35078700  |
| C  | 3.51673200  | -1.95171700 | -0.82192000 |
| C  | 4.35856300  | -0.80185200 | 1.58754300  |
| C  | 4.87832300  | -1.74714400 | -0.59443100 |
| C  | 5.27205100  | -1.17804700 | 0.60964800  |
| H  | 4.70835300  | -0.35078900 | 2.50964500  |
| H  | 5.62174000  | -2.00557400 | -1.34064000 |
| C  | -0.62740300 | -3.10560900 | -0.81364200 |
| H  | 2.27041900  | -0.71666700 | 2.09442800  |
| H  | 3.18862200  | -2.35904700 | -1.77308100 |
| F  | 6.59764300  | -0.96967000 | 0.83452700  |
| O  | 0.77222500  | 3.44407200  | 0.11508000  |
| C  | 1.25032500  | 2.31305000  | 0.18153300  |
| O  | 2.40270200  | 1.92649600  | -0.33790100 |
| O  | 0.63995900  | 1.31605100  | 0.82166300  |
| H  | 2.87212600  | 2.68256700  | -0.80391700 |
| C  | -2.71825400 | 0.68781800  | 1.62143500  |

|                           |             |             |             |                           |             |             |             |
|---------------------------|-------------|-------------|-------------|---------------------------|-------------|-------------|-------------|
| H                         | 0.96982500  | 3.00409800  | 0.59924200  | H                         | -2.65396500 | 1.49416300  | 2.36882500  |
| H                         | 1.31602000  | 4.38074700  | 1.19212000  | O                         | -1.58935300 | 0.78926000  | 0.77389300  |
| O                         | -4.46795600 | 3.24994900  | -0.46412600 | H                         | -0.46602200 | 1.43077300  | 0.97507100  |
| H                         | -4.99994500 | 3.51864900  | -1.22307700 | H                         | -2.71003500 | -0.25950500 | 2.17981400  |
| H                         | -3.67597600 | 3.82679200  | -0.43704100 | C                         | -4.03250400 | 0.81125400  | 0.87035900  |
|                           |             |             |             | C                         | -5.19587500 | 0.23120500  | 1.39456900  |
|                           |             |             |             | C                         | -4.11600300 | 1.53286900  | -0.32702500 |
|                           |             |             |             | C                         | -6.42301000 | 0.37645100  | 0.74199000  |
|                           |             |             |             | H                         | -5.14245400 | -0.34234100 | 2.31779900  |
|                           |             |             |             | C                         | -5.34128600 | 1.67491200  | -0.98411400 |
|                           |             |             |             | H                         | -3.21362700 | 1.97117100  | -0.74077400 |
|                           |             |             |             | C                         | -6.49901000 | 1.09989100  | -0.45168700 |
|                           |             |             |             | H                         | -7.31515500 | -0.08124300 | 1.16038000  |
|                           |             |             |             | H                         | -5.39140300 | 2.23525700  | -1.91372000 |
|                           |             |             |             | H                         | -7.45047500 | 1.21039400  | -0.96397900 |
|                           |             |             |             | O                         | 3.67673800  | 3.86854300  | -1.60747800 |
|                           |             |             |             | H                         | 4.57162400  | 4.08497100  | -1.31937600 |
|                           |             |             |             | H                         | 3.12795000  | 4.68660300  | -1.50955000 |
|                           |             |             |             | O                         | 1.83818200  | 5.71389000  | -0.99632000 |
|                           |             |             |             | H                         | 1.23333900  | 6.14902900  | -1.60847000 |
|                           |             |             |             | H                         | 1.33354400  | 4.99322100  | -0.55439500 |
| <b>11</b>                 |             |             |             | <b>TS12-13</b>            |             |             |             |
| Charge=0 Multiplicity = 2 |             |             |             | Charge=0 Multiplicity = 2 |             |             |             |
| Cu                        | 1.20308700  | 0.65927700  | 0.02651300  | Cu                        | -0.01908100 | 0.79036000  | -0.30493600 |
| C                         | 3.41659300  | -2.70921100 | -0.08673800 | C                         | -1.82272900 | 4.36209600  | 0.46591700  |
| N                         | 2.69818200  | -0.54444100 | 0.05227400  | N                         | -0.32826100 | 2.71075900  | -0.05229300 |
| C                         | 4.53253400  | -1.87127300 | 0.01967800  | C                         | -0.56505500 | 4.93963800  | 0.26884800  |
| H                         | 3.40998400  | -3.78827800 | -0.16689800 | H                         | -2.74675500 | 4.86564700  | 0.71899400  |
| C                         | 4.04395800  | -0.54961400 | 0.09992000  | C                         | 0.32214500  | 3.88388000  | -0.04872100 |
| H                         | 5.57309300  | -2.16522500 | 0.03670400  | H                         | -0.30707400 | 5.98796900  | 0.33646900  |
| H                         | 4.60834600  | 0.37037500  | 0.18485500  | H                         | 1.37927900  | 3.94055900  | -0.27451700 |
| C                         | 0.89503100  | -2.07406000 | -0.12634500 | C                         | -2.51749200 | 1.86365100  | 0.29323600  |
| H                         | 0.49146300  | -3.08099200 | -0.22999600 | H                         | -3.57601600 | 1.99543200  | 0.52324600  |
| N                         | 0.10057300  | -1.02448100 | -0.07811700 | N                         | -2.02725200 | 0.66151300  | 0.06330000  |
| C                         | -1.30715800 | -1.11413400 | -0.05357900 | C                         | -2.87862500 | -0.46246300 | -0.01350000 |
| C                         | -2.05630300 | 0.00047800  | -0.46987600 | C                         | -2.44632100 | -1.69359100 | 0.51047300  |
| C                         | -1.98743200 | -2.26265700 | 0.39476300  | C                         | -4.14681900 | -0.39212500 | -0.62066700 |
| C                         | -3.44931100 | -0.04048700 | -0.47957200 | C                         | -3.26764200 | -2.81917700 | 0.45939100  |
| C                         | -3.38082500 | -2.31352200 | 0.38196100  | C                         | -4.97773500 | -1.51254500 | -0.67329200 |
| C                         | -4.08716600 | -1.20204900 | -0.06191500 | C                         | -4.52246800 | -2.70590800 | -0.12781200 |
| H                         | -4.03525900 | 0.81463900  | -0.79819000 | H                         | -2.94439800 | -3.76963500 | 0.87002000  |
| H                         | -3.91562000 | -3.19132400 | 0.72820200  | H                         | -5.95441100 | -1.46989600 | -1.14336100 |
| C                         | 2.28735900  | -1.86415200 | -0.06258100 | C                         | -1.65168800 | 2.97409200  | 0.25931900  |
| H                         | -1.53552600 | 0.90406300  | -0.77123100 | H                         | -1.46573000 | -1.76462000 | 0.96535100  |

|   |             |             |             |   |             |             |             |
|---|-------------|-------------|-------------|---|-------------|-------------|-------------|
| H | -1.43656600 | -3.11438400 | 0.77928800  | H | -4.47583700 | 0.53506500  | -1.07913200 |
| F | -5.44578700 | -1.24785300 | -0.06778800 | F | -5.32628600 | -3.80289400 | -0.18243600 |
| O | 0.46454000  | 2.28570200  | -0.07769300 | O | 0.46638600  | -1.18971500 | -0.96945100 |
| H | 0.08527800  | 2.69899000  | 0.72270500  | H | 0.01646000  | -1.51706500 | -1.75940000 |
| O | 0.12902200  | 4.78622600  | -1.11766700 | O | 1.75685700  | 0.73683000  | -1.16698300 |
| H | 0.32981700  | 3.82696700  | -1.01178000 | C | 2.98280900  | 1.07968600  | -0.52754900 |
| H | -0.41652900 | 4.87431700  | -1.90770200 | H | 3.50834000  | 1.79818700  | -1.17420300 |
| O | -0.73633000 | 4.33593400  | 1.48356700  | H | 2.78706300  | 1.57561100  | 0.43118300  |
| H | -0.38115200 | 4.89799500  | 2.18171700  | H | 1.31889200  | -0.47995800 | -1.21850900 |
| H | -0.54759300 | 4.78814600  | 0.63447500  | C | 3.86817300  | -0.12922100 | -0.29199000 |
|   |             |             |             | C | 4.16189700  | -0.57076100 | 1.00529400  |
|   |             |             |             | C | 4.40273100  | -0.83718800 | -1.38014900 |
|   |             |             |             | C | 4.96971400  | -1.69488400 | 1.21373800  |
|   |             |             |             | H | 3.75143700  | -0.03171600 | 1.85506800  |
|   |             |             |             | C | 5.20312000  | -1.96301100 | -1.17756500 |
|   |             |             |             | H | 4.18756700  | -0.50004200 | -2.39115200 |
|   |             |             |             | C | 5.48913200  | -2.39613600 | 0.12201800  |
|   |             |             |             | H | 5.19769000  | -2.01707200 | 2.22647100  |
|   |             |             |             | H | 5.61067400  | -2.49832600 | -2.03069200 |
|   |             |             |             | H | 6.11780100  | -3.26765800 | 0.28113900  |
|   |             |             |             | O | 1.13869700  | -2.46640700 | 1.34287500  |
|   |             |             |             | H | 2.07115900  | -2.72003900 | 1.36154500  |
|   |             |             |             | H | 0.94077700  | -2.22857600 | 0.40776600  |
|   |             |             |             | O | 0.75089200  | 0.18197900  | 1.86878900  |
|   |             |             |             | H | 0.14314400  | 0.40190000  | 2.58524900  |
|   |             |             |             | H | 0.89690200  | -0.79375000 | 1.89271600  |

**Table S4** Cartesian coordinates all structures considered in this work (3H<sub>2</sub>O level)

| <b>0</b> |                            |             |             | <b>TS1-2</b> |                            |             |             |
|----------|----------------------------|-------------|-------------|--------------|----------------------------|-------------|-------------|
|          | Charge=-1 Multiplicity = 2 |             |             |              | Charge=-1 Multiplicity = 2 |             |             |
| Cu       | 0.30938300                 | 1.17336600  | -0.11368400 | Cu           | -1.09481400                | -0.31480600 | -0.64079200 |
| C        | -2.50315700                | 4.11044800  | 0.30804000  | O            | 0.43341700                 | 0.91468400  | -1.05915600 |
| N        | -0.57398600                | 2.92698600  | -0.01139600 | C            | -3.43904600                | -3.23053600 | -2.26580400 |
| C        | -1.43921400                | 5.01276200  | 0.17200200  | N            | -2.59712400                | -1.24019000 | -1.51655800 |
| H        | -3.54870100                | 4.34220600  | 0.46950000  | C            | -4.33006200                | -2.20686400 | -2.60895300 |
| C        | -0.27281300                | 4.23530600  | -0.01966000 | H            | -3.53867700                | -4.28888600 | -2.47168500 |
| H        | -1.48794300                | 6.09362000  | 0.20602600  | C            | -3.76964200                | -1.00121100 | -2.12247900 |
| H        | 0.74881200                 | 4.56688500  | -0.15680800 | H            | -5.27039200                | -2.30510100 | -3.13569900 |
| C        | -2.46631800                | 1.51121800  | 0.23992800  | H            | -4.17148800                | 0.00250700  | -2.18166000 |
| H        | -3.53665000                | 1.36381300  | 0.40226300  | C            | -1.18830700                | -3.07172200 | -0.97129200 |
| N        | -1.65541200                | 0.48672700  | 0.11201900  | H            | -0.97170200                | -4.14133700 | -0.92693100 |
| C        | -2.14741500                | -0.83379100 | 0.06424000  | N            | -0.38228300                | -2.20352000 | -0.40403100 |
| C        | -1.33267900                | -1.87236300 | 0.54717700  | C            | 0.78428700                 | -2.60758300 | 0.27559900  |
| C        | -3.40261600                | -1.15817500 | -0.48649800 | C            | 1.08502900                 | -2.00546000 | 1.51082800  |
| C        | -1.75892900                | -3.19870900 | 0.50842800  | C            | 1.65592100                 | -3.58028400 | -0.24476100 |

|                            |             |             |             |                           |             |             |             |
|----------------------------|-------------|-------------|-------------|---------------------------|-------------|-------------|-------------|
| C                          | -3.84620800 | -2.48205500 | -0.51661100 | C                         | 2.21732100  | -2.38859700 | 2.22821900  |
| C                          | -3.01558000 | -3.47570500 | -0.01397000 | C                         | 2.79305800  | -3.96893600 | 0.46772100  |
| H                          | -1.10693400 | -3.99293500 | 0.85495000  | C                         | 3.04748200  | -3.36628500 | 1.69264000  |
| H                          | -4.80739400 | -2.74577700 | -0.94591500 | H                         | 2.44533300  | -1.93863200 | 3.18841600  |
| C                          | -1.93638700 | 2.82209100  | 0.18890400  | H                         | 3.47972700  | -4.71232400 | 0.07639700  |
| H                          | -0.35184400 | -1.63659800 | 0.93970900  | C                         | -2.36856400 | -2.60298900 | -1.59003100 |
| H                          | -4.02331900 | -0.38300800 | -0.92498200 | H                         | 0.41888300  | -1.24848000 | 1.91128700  |
| F                          | -3.44920800 | -4.77318000 | -0.05987300 | H                         | 1.45836500  | -4.01474700 | -1.22003300 |
| O                          | 3.67041500  | -0.13575100 | -0.41393300 | F                         | 4.16132800  | -3.74508100 | 2.38945300  |
| C                          | 2.51222900  | 0.32367300  | -0.31993600 | O                         | -2.33348100 | 2.62446700  | 1.53805200  |
| O                          | 2.21424500  | 1.59793900  | -0.34559400 | C                         | -1.82787600 | 1.66509600  | 0.92033300  |
| O                          | 1.42857000  | -0.43127500 | -0.18354900 | O                         | -1.69452400 | 1.76864600  | -0.46014200 |
| O                          | 1.72573300  | -3.26449500 | 0.43355500  | O                         | -1.41610900 | 0.55904300  | 1.39555700  |
| H                          | 1.58513800  | -2.33598200 | 0.16408200  | H                         | -0.60773300 | 1.66326100  | -0.72562800 |
| H                          | 2.69528400  | -3.34212100 | 0.42745500  | C                         | 1.65170900  | 1.05274000  | -0.37586800 |
| O                          | 4.55192400  | -2.63303200 | -0.11240500 | H                         | 2.15003900  | 0.07368800  | -0.30193000 |
| H                          | 4.13807700  | -1.73461000 | -0.24783900 | H                         | 1.49208800  | 1.39719300  | 0.65984100  |
| H                          | 4.74117500  | -2.95802000 | -1.00078700 | C                         | 2.60833100  | 2.01642800  | -1.06523100 |
| O                          | 6.46615900  | -0.27517100 | 0.41006300  | C                         | 3.84555200  | 2.31132000  | -0.47191800 |
| H                          | 6.18944500  | -1.20365100 | 0.45815300  | C                         | 2.29051200  | 2.61472300  | -2.28899000 |
| H                          | 5.63956700  | 0.16728300  | 0.14815000  | C                         | 4.74614700  | 3.18202200  | -1.08749300 |
|                            |             |             |             | H                         | 4.10252700  | 1.85686100  | 0.48327700  |
|                            |             |             |             | C                         | 3.19031000  | 3.48989700  | -2.90754000 |
|                            |             |             |             | H                         | 1.33220600  | 2.38518400  | -2.74243700 |
|                            |             |             |             | C                         | 4.42096200  | 3.77689300  | -2.31221800 |
|                            |             |             |             | H                         | 5.69897600  | 3.39996200  | -0.61121000 |
|                            |             |             |             | H                         | 2.92553700  | 3.95026500  | -3.85633100 |
|                            |             |             |             | H                         | 5.11825700  | 4.45860600  | -2.79239300 |
|                            |             |             |             | O                         | -0.66575800 | 0.33601600  | 4.15327100  |
|                            |             |             |             | H                         | -0.95010000 | 0.33919800  | 3.21783000  |
|                            |             |             |             | H                         | -1.09947200 | 1.13488400  | 4.50039700  |
|                            |             |             |             | O                         | -2.16445100 | 2.88237400  | 4.27045700  |
|                            |             |             |             | H                         | -2.28544900 | 2.73164700  | 3.30030000  |
|                            |             |             |             | H                         | -1.62225700 | 3.67840000  | 4.32228600  |
|                            |             |             |             | O                         | -3.66638400 | 5.03077400  | 0.96734300  |
|                            |             |             |             | H                         | -4.24544100 | 4.90683000  | 1.72870700  |
|                            |             |             |             | H                         | -3.12613800 | 4.21212600  | 0.95960100  |
| <b>TS5-6</b>               |             |             |             | <b>8</b>                  |             |             |             |
| Charge=-1 Multiplicity = 2 |             |             |             | Charge=0 Multiplicity = 2 |             |             |             |
| Cu                         | -0.19942300 | -0.93617600 | 0.06106900  | Cu                        | 0.71887600  | 0.48476400  | 0.05359500  |
| O                          | -0.73250900 | 0.06296200  | -2.08441900 | C                         | 0.42542600  | 4.49757600  | 0.31340200  |
| C                          | -0.10509500 | -5.02033000 | -0.05065600 | N                         | 1.17103700  | 2.34858700  | 0.13504100  |
| N                          | -0.71542900 | -2.82105400 | -0.00533100 | C                         | 1.82530900  | 4.50943200  | 0.25937000  |
| C                          | -1.50513500 | -4.93973300 | -0.08606900 | H                         | -0.23611400 | 5.34970200  | 0.39737500  |

|   |             |             |             |   |             |             |             |
|---|-------------|-------------|-------------|---|-------------|-------------|-------------|
| H | 0.50534800  | -5.91468400 | -0.05912600 | C | 2.24159700  | 3.16649000  | 0.15119500  |
| C | -1.83296700 | -3.56566500 | -0.05613800 | H | 2.47430800  | 5.37354100  | 0.29944500  |
| H | -2.20789200 | -5.76205900 | -0.12569800 | H | 3.24952600  | 2.77545500  | 0.09666700  |
| H | -2.80765200 | -3.09652300 | -0.06640800 | C | -1.19306700 | 2.45965300  | 0.22602600  |
| C | 1.63910200  | -3.09177900 | 0.05676400  | H | -2.13734800 | 3.00219000  | 0.27959700  |
| H | 2.53746500  | -3.71380900 | 0.04872100  | N | -1.18569700 | 1.14446300  | 0.16904400  |
| N | 1.73385000  | -1.78745200 | 0.14115700  | C | -2.37440000 | 0.39684600  | 0.00514000  |
| C | 3.00434300  | -1.16941800 | 0.09260800  | C | -2.52441700 | -0.81638200 | 0.69510800  |
| C | 3.30716600  | -0.12297500 | 0.98045200  | C | -3.39580600 | 0.82931000  | -0.86046300 |
| C | 3.97498200  | -1.57721200 | -0.84093800 | C | -3.67882100 | -1.58075300 | 0.54387400  |
| C | 4.56414600  | 0.48035400  | 0.95992900  | C | -4.56327800 | 0.07990400  | -1.00443700 |
| C | 5.23728900  | -0.98076500 | -0.86561600 | C | -4.68099700 | -1.11132300 | -0.29697400 |
| C | 5.50695900  | 0.03435000  | 0.04233100  | H | -3.78391000 | -2.52959900 | 1.05703800  |
| H | 4.80095900  | 1.29168900  | 1.63934900  | H | -5.36012700 | 0.39584200  | -1.66898600 |
| H | 5.99104700  | -1.27851500 | -1.58698900 | C | 0.04099300  | 3.14409400  | 0.23309600  |
| C | 0.35750300  | -3.68862100 | -0.00114200 | H | -1.73533700 | -1.17002200 | 1.34711100  |
| H | 2.55878800  | 0.22307700  | 1.68309600  | H | -3.26740600 | 1.73731400  | -1.44142800 |
| H | 3.72950800  | -2.34274500 | -1.57066400 | F | -5.81190200 | -1.84927800 | -0.45097300 |
| F | 6.74118800  | 0.62093900  | 0.02007500  | O | 2.34422100  | -2.86348800 | -0.15464900 |
| O | -2.19561200 | -0.36734300 | -0.27091700 | C | 1.81785600  | -1.75830000 | -0.10960300 |
| H | -0.76444000 | -0.25780500 | -2.99122800 | O | 2.52533300  | -0.57701100 | -0.22802800 |
| C | -2.76197600 | 0.78029000  | 0.33587900  | O | 0.57054200  | -1.46501200 | 0.05442200  |
| H | -2.46111600 | 0.81182500  | 1.39117800  | H | 3.52895300  | -0.65150000 | -0.40152300 |
| H | -2.36465500 | 1.69460400  | -0.12796600 | O | -1.01599400 | -3.66447200 | 1.15706700  |
| C | -4.28023700 | 0.80119000  | 0.25263900  | H | -0.45288200 | -3.02641300 | 0.68397100  |
| C | -4.98586200 | 1.87810900  | 0.81168700  | H | -0.45859300 | -4.43909200 | 1.29589000  |
| C | -5.00192800 | -0.22433000 | -0.36680700 | O | 5.05576500  | -0.77618600 | -0.65893600 |
| C | -6.37943900 | 1.92689900  | 0.75656700  | H | 5.38446700  | -0.51714200 | -1.52853400 |
| H | -4.43674400 | 2.68551200  | 1.29226100  | H | 5.27442000  | -1.73654300 | -0.53085800 |
| C | -6.39932100 | -0.17788500 | -0.42469200 | O | 5.02990600  | -3.37599700 | -0.13674200 |
| H | -4.45433100 | -1.05374700 | -0.80107700 | H | 5.31649800  | -4.18135700 | -0.58185600 |
| C | -7.09438200 | 0.89567100  | 0.13636600  | H | 4.04532500  | -3.37033900 | -0.12747800 |
| H | -6.90789200 | 2.77003500  | 1.19434200  |   |             |             |             |
| H | -6.94412200 | -0.98338100 | -0.91103800 |   |             |             |             |
| H | -8.17965600 | 0.93206900  | 0.09075400  |   |             |             |             |
| H | -1.73607800 | -0.13353100 | -1.26200200 |   |             |             |             |
| O | 1.19767800  | 2.84870200  | 0.76386400  |   |             |             |             |
| C | 0.69522800  | 1.90408900  | 0.11155200  |   |             |             |             |
| O | 0.53597700  | 2.04254900  | -1.20570300 |   |             |             |             |
| O | 0.32348300  | 0.80469200  | 0.68786900  |   |             |             |             |
| H | 0.05097200  | 1.23498900  | -1.64083400 |   |             |             |             |
| O | 1.44759000  | 1.95967800  | 3.41490900  |   |             |             |             |
| H | 0.80862500  | 1.24219600  | 3.32064700  |   |             |             |             |
| H | 1.41585900  | 2.38050500  | 2.52633800  |   |             |             |             |

|                           |             |             |             |                           |              |             |             |
|---------------------------|-------------|-------------|-------------|---------------------------|--------------|-------------|-------------|
| O                         | 0.84613400  | 4.67300200  | -2.73087300 |                           |              |             |             |
| H                         | 0.68461100  | 3.77261200  | -2.40577900 |                           |              |             |             |
| H                         | 1.25639200  | 5.10227900  | -1.95691800 |                           |              |             |             |
| O                         | 1.86615100  | 5.35560700  | -0.10702800 |                           |              |             |             |
| H                         | 1.67824900  | 4.42611500  | 0.17590400  |                           |              |             |             |
| H                         | 1.27697700  | 5.89725800  | 0.43078000  |                           |              |             |             |
| <b>TS9-10</b>             |             |             |             | <b>11</b>                 |              |             |             |
| Charge=0 Multiplicity = 2 |             |             |             | Charge=0 Multiplicity = 2 |              |             |             |
| Cu                        | -0.27378100 | -1.18932900 | 0.57819100  | Cu                        | 1.10177100   | 0.61846600  | 0.02511600  |
| C                         | -0.98352100 | -4.43916100 | -1.72856200 | C                         | 4.03991500   | -2.14428500 | -0.06444300 |
| N                         | -1.20180500 | -2.59348400 | -0.40139200 | N                         | 2.83690000   | -0.20590400 | 0.06620300  |
| C                         | -2.34440600 | -4.19779200 | -1.51281000 | C                         | 4.92961800   | -1.06947400 | 0.04362000  |
| H                         | -0.54050500 | -5.23144400 | -2.31769900 | H                         | 4.28503000   | -3.19534700 | -0.14237500 |
| C                         | -2.43235400 | -3.05336700 | -0.68960000 | C                         | 4.14631600   | 0.10256500  | 0.11836600  |
| H                         | -3.17981800 | -4.76793500 | -1.89584400 | H                         | 6.00994800   | -1.11310900 | 0.06521300  |
| H                         | -3.31971200 | -2.55923300 | -0.31710600 | H                         | 4.47996100   | 1.12909800  | 0.20217100  |
| C                         | 1.06860900  | -3.09383700 | -0.86923700 | C                         | 1.43967200   | -2.11240500 | -0.11770700 |
| H                         | 1.85122600  | -3.69815700 | -1.32814100 | H                         | 1.28205200   | -3.18570700 | -0.22075700 |
| N                         | 1.38001500  | -2.04650900 | -0.13065900 | N                         | 0.42301300   | -1.27543100 | -0.07671300 |
| C                         | 2.71846300  | -1.61066500 | 0.00405300  | C                         | -0.92548800  | -1.68928900 | -0.06179500 |
| C                         | 3.16038000  | -1.13474600 | 1.24860800  | C                         | -1.91087600  | -0.77173000 | -0.46696200 |
| C                         | 3.61358300  | -1.62769200 | -1.07940000 | C                         | -1.32444900  | -2.97017100 | 0.36622500  |
| C                         | 4.47656200  | -0.71337200 | 1.42182700  | C                         | -3.25683800  | -1.13273600 | -0.48622900 |
| C                         | 4.93552200  | -1.21290300 | -0.91536300 | C                         | -2.66850400  | -3.34075400 | 0.34437700  |
| C                         | 5.34207700  | -0.76637100 | 0.33542600  | C                         | -3.61105100  | -2.41590700 | -0.08857900 |
| H                         | 4.83101500  | -0.34550600 | 2.37835400  | H                         | -4.02334600  | -0.43117400 | -0.79667800 |
| H                         | 5.63585900  | -1.21489900 | -1.74351900 | H                         | -2.98710200  | -4.32333200 | 0.67525500  |
| C                         | -0.29011000 | -3.42661100 | -1.03137200 | C                         | 2.74470000   | -1.58503000 | -0.04674400 |
| H                         | 2.46609000  | -1.09348100 | 2.08073700  | H                         | -1.61281100  | 0.23256500  | -0.75168300 |
| H                         | 3.27052700  | -1.93837000 | -2.06115800 | H                         | -0.59371100  | -3.67826800 | 0.74216200  |
| F                         | 6.62776600  | -0.35521500 | 0.49913400  | F                         | -4.92269600  | -2.77352200 | -0.10383900 |
| O                         | -0.20422700 | 2.88439900  | 0.60867700  | O                         | 0.05091600   | 2.06173400  | -0.08572700 |
| C                         | 0.59568300  | 1.94816100  | 0.53701300  | H                         | -0.38726100  | 2.39917500  | 0.72927400  |
| O                         | 1.70452600  | 1.93819700  | -0.17778600 | O                         | -1.96995200  | 5.35803700  | 0.21927300  |
| O                         | 0.42188400  | 0.81417100  | 1.20336300  | H                         | -1.51833400  | 5.01470900  | -0.58978100 |
| H                         | 1.85019500  | 2.79735100  | -0.67868400 | H                         | -2.87627700  | 5.56981800  | -0.03160100 |
| C                         | -2.85126500 | -0.30002300 | 2.07829900  | O                         | -1.34150700  | 3.33978700  | 1.95435000  |
| H                         | -2.99206000 | 0.34437400  | 2.95941300  | H                         | -0.90440100  | 3.69850100  | 2.73553700  |
| O                         | -1.46629500 | -0.31239700 | 1.79311200  | H                         | -1.64481200  | 4.11677300  | 1.42625200  |
| H                         | -0.62726300 | 0.62460000  | 1.64447000  | O                         | -0.54830600  | 4.09670900  | -1.73486500 |
| H                         | -3.16170700 | -1.31123400 | 2.37201500  | H                         | -0.28076400  | 3.28600500  | -1.22437600 |
| C                         | -3.73987200 | 0.19250900  | 0.94928100  | H                         | -0.84195600  | 3.80099200  | -2.60386500 |
| C                         | -4.97522300 | -0.42669200 | 0.71514400  | H                         | -10.95421660 | 1.51295823  | 0.00000008  |
| C                         | -3.37406400 | 1.29138400  | 0.15847200  | C                         | -11.31087103 | 2.52176823  | 0.00000008  |



|                           |             |             |             |   |              |            |             |
|---------------------------|-------------|-------------|-------------|---|--------------|------------|-------------|
| C                         | -5.83230100 | 0.03873100  | -0.28675100 | H | -10.95419819 | 3.02616642 | 0.87365158  |
| H                         | -5.27165000 | -1.27992100 | 1.32219000  | H | -10.95419819 | 3.02616642 | -0.87365143 |
| C                         | -4.22594000 | 1.75320400  | -0.84785400 | H | -12.38087103 | 2.52178142 | 0.00000008  |
| H                         | -2.42583000 | 1.79333700  | 0.32855300  |   |              |            |             |
| C                         | -5.45727700 | 1.12998000  | -1.07403400 |   |              |            |             |
| H                         | -6.78551200 | -0.45472900 | -0.45531800 |   |              |            |             |
| H                         | -3.92700900 | 2.60459100  | -1.45294900 |   |              |            |             |
| H                         | -6.11740400 | 1.49150100  | -1.85725800 |   |              |            |             |
| O                         | 2.35209800  | 4.03581900  | -1.61097300 |   |              |            |             |
| H                         | 2.39474400  | 3.87900000  | -2.56156300 |   |              |            |             |
| H                         | 1.98731400  | 4.95053200  | -1.48791300 |   |              |            |             |
| O                         | 1.24150600  | 6.45657400  | -1.25338300 |   |              |            |             |
| H                         | 0.39252100  | 6.23703800  | -0.79633900 |   |              |            |             |
| H                         | 1.70212500  | 7.10129900  | -0.70380800 |   |              |            |             |
| O                         | -0.95270000 | 5.42085400  | -0.08948800 |   |              |            |             |
| H                         | -1.52148500 | 5.72554200  | 0.62645500  |   |              |            |             |
| H                         | -0.67096700 | 4.50781700  | 0.14272100  |   |              |            |             |
| <b>TS12-13</b>            |             |             |             |   |              |            |             |
| Charge=0 Multiplicity = 2 |             |             |             |   |              |            |             |
| Cu                        | -0.02709600 | 0.89942600  | -0.26901700 |   |              |            |             |
| C                         | -1.83655300 | 4.44778600  | 0.59176200  |   |              |            |             |
| N                         | -0.33102000 | 2.80806300  | 0.07112700  |   |              |            |             |
| C                         | -0.56871200 | 5.02432300  | 0.46768000  |   |              |            |             |
| H                         | -2.76720100 | 4.94684100  | 0.82889200  |   |              |            |             |
| C                         | 0.32465400  | 3.97607800  | 0.14443200  |   |              |            |             |
| H                         | -0.30787700 | 6.06723700  | 0.58799600  |   |              |            |             |
| H                         | 1.39001300  | 4.03595900  | -0.03766600 |   |              |            |             |
| C                         | -2.53387700 | 1.96076500  | 0.29377900  |   |              |            |             |
| H                         | -3.60534300 | 2.08627400  | 0.45951400  |   |              |            |             |
| N                         | -2.03424700 | 0.76459300  | 0.05832400  |   |              |            |             |
| C                         | -2.89269200 | -0.34219600 | -0.14072100 |   |              |            |             |
| C                         | -2.62866000 | -1.55695300 | 0.51453900  |   |              |            |             |
| C                         | -3.99942200 | -0.25584400 | -1.00463500 |   |              |            |             |
| C                         | -3.46503600 | -2.65687000 | 0.32529900  |   |              |            |             |
| C                         | -4.84309300 | -1.35207800 | -1.19716500 |   |              |            |             |
| C                         | -4.55716800 | -2.53354600 | -0.52606300 |   |              |            |             |
| H                         | -3.27982400 | -3.59570200 | 0.83605500  |   |              |            |             |
| H                         | -5.69744500 | -1.29928400 | -1.86345900 |   |              |            |             |
| C                         | -1.66395300 | 3.06812600  | 0.34040000  |   |              |            |             |
| H                         | -1.79051700 | -1.63572300 | 1.19804100  |   |              |            |             |
| H                         | -4.18693200 | 0.66667300  | -1.54565400 |   |              |            |             |
| F                         | -5.37107600 | -3.60941000 | -0.71319700 |   |              |            |             |
| O                         | 0.45059900  | -1.05654800 | -1.08065800 |   |              |            |             |
| H                         | -0.04979600 | -1.33906100 | -1.85731100 |   |              |            |             |

|   |             |             |             |
|---|-------------|-------------|-------------|
| O | 1.70301200  | 0.89965400  | -1.23972200 |
| C | 2.97160100  | 1.23663100  | -0.69178600 |
| H | 3.45181000  | 1.95566700  | -1.37258100 |
| H | 2.84738700  | 1.73374700  | 0.27870500  |
| H | 1.27487200  | -0.30173900 | -1.33575600 |
| C | 3.87114800  | 0.02674800  | -0.52050600 |
| C | 4.30497800  | -0.38041100 | 0.74790400  |
| C | 4.27518400  | -0.71855000 | -1.64038000 |
| C | 5.11890800  | -1.50957200 | 0.89933500  |
| H | 3.99796900  | 0.18629100  | 1.62322800  |
| C | 5.08109700  | -1.84888600 | -1.49457100 |
| H | 3.95093800  | -0.40820700 | -2.63053200 |
| C | 5.50501200  | -2.24975200 | -0.22169700 |
| H | 5.45180100  | -1.80688300 | 1.89012300  |
| H | 5.38556600  | -2.41363400 | -2.37137600 |
| H | 6.13809300  | -3.12512400 | -0.10760500 |
| O | 1.52615400  | -2.54184300 | 0.89557800  |
| H | 2.45990600  | -2.71213400 | 0.71370600  |
| H | 1.12671800  | -2.18798900 | 0.06183600  |
| O | 0.85545900  | 0.11681900  | 1.76720100  |
| H | 0.20211400  | -0.11686100 | 2.44478400  |
| H | 1.29223100  | -0.73764300 | 1.58441800  |
| O | -0.32689100 | -2.30014700 | 2.96912600  |
| H | 0.35629800  | -2.67664800 | 2.38162500  |
| H | -0.40560000 | -2.88759500 | 3.72931300  |

**Table S5** Cartesian coordinates all structures considered in this work (4H<sub>2</sub>O level)

| <b>0</b>                   |             |             |             | <b>TS5-6</b>               |             |             |             |
|----------------------------|-------------|-------------|-------------|----------------------------|-------------|-------------|-------------|
| Charge=-1 Multiplicity = 2 |             |             |             | Charge=-1 Multiplicity = 2 |             |             |             |
| Cu                         | 0.66810900  | 0.59541500  | 0.03352100  | Cu                         | 0.46540000  | 1.10040300  | 0.02266400  |
| C                          | 0.36223300  | 4.65152800  | 0.32712100  | O                          | 0.81711900  | -0.19472800 | -2.05009300 |
| N                          | 1.10759600  | 2.50350300  | 0.10527400  | C                          | 0.96346300  | 5.12111500  | -0.49453500 |
| C                          | 1.76247300  | 4.66367500  | 0.27506800  | N                          | 1.24731800  | 2.87066800  | -0.24125400 |
| H                          | -0.30158700 | 5.50117600  | 0.42807000  | C                          | 2.33406500  | 4.82901600  | -0.55916900 |
| C                          | 2.17582600  | 3.31716700  | 0.14162700  | H                          | 0.49044200  | 6.09151700  | -0.57845200 |
| H                          | 2.41274300  | 5.52725400  | 0.32784400  | C                          | 2.45886200  | 3.43101200  | -0.39786300 |
| H                          | 3.18094500  | 2.91830000  | 0.07681600  | H                          | 3.14704900  | 5.52925400  | -0.70151100 |
| C                          | -1.26119800 | 2.62129700  | 0.21469600  | H                          | 3.35296900  | 2.82230300  | -0.38611200 |
| H                          | -2.18991600 | 3.18860400  | 0.30499000  | C                          | -1.03701600 | 3.49340100  | -0.14283600 |
| N                          | -1.27828600 | 1.31036000  | 0.12172800  | H                          | -1.83533000 | 4.23816500  | -0.18320700 |
| C                          | -2.49161600 | 0.59855600  | 0.01147600  | N                          | -1.31556300 | 2.23083100  | 0.07234000  |
| C                          | -2.55292500 | -0.71200700 | 0.51528000  | C                          | -2.66383500 | 1.80888300  | 0.13622500  |
| C                          | -3.62886400 | 1.13458500  | -0.62348300 | C                          | -3.06819400 | 0.91335500  | 1.14067100  |
| C                          | -3.71909700 | -1.46835800 | 0.41266800  | C                          | -3.61381400 | 2.26692900  | -0.79500200 |
| C                          | -4.80794400 | 0.39247700  | -0.71565600 | C                          | -4.40015500 | 0.51258600  | 1.23693400  |

|                           |             |             |             |                           |             |             |             |
|---------------------------|-------------|-------------|-------------|---------------------------|-------------|-------------|-------------|
| C                         | -4.82985900 | -0.89394000 | -0.19120900 | C                         | -4.95021300 | 1.87262200  | -0.70418000 |
| H                         | -3.73962500 | -2.49192800 | 0.77000700  | C                         | -5.31684800 | 1.00668000  | 0.31738800  |
| H                         | -5.68815000 | 0.79053900  | -1.21002200 | H                         | -4.71599800 | -0.18038300 | 2.00893000  |
| C                         | -0.01871800 | 3.29558700  | 0.21894200  | H                         | -5.69078200 | 2.21009600  | -1.42161400 |
| H                         | -1.67295800 | -1.14664800 | 0.97234200  | C                         | 0.31364700  | 3.88496900  | -0.29707800 |
| H                         | -3.58731600 | 2.11864000  | -1.07970200 | H                         | -2.34114100 | 0.52505700  | 1.84327000  |
| F                         | -5.98293500 | -1.62188200 | -0.29966300 | H                         | -3.29944200 | 2.91057600  | -1.61093600 |
| O                         | 2.46581100  | -2.55698300 | -0.03858100 | F                         | -6.62367100 | 0.62070600  | 0.41028300  |
| C                         | 1.84411500  | -1.47950900 | -0.03569500 | O                         | 2.34052200  | 0.22137700  | -0.28084100 |
| O                         | 2.41974000  | -0.29020700 | -0.10961100 | H                         | 0.89333600  | -0.02228700 | -2.99386100 |
| O                         | 0.53130800  | -1.36163500 | 0.04419600  | C                         | 2.76502000  | -0.92102700 | 0.44194500  |
| O                         | -1.17615600 | -3.75781000 | 0.31215300  | H                         | 2.47851000  | -0.80468600 | 1.49499400  |
| H                         | -0.66627100 | -2.94804100 | 0.12751800  | H                         | 2.24669900  | -1.81894300 | 0.07540200  |
| H                         | -0.47311500 | -4.42472700 | 0.41706800  | C                         | 4.26650100  | -1.14562800 | 0.35749500  |
| O                         | 1.40577600  | -5.05233000 | 0.42985800  | C                         | 4.84546400  | -2.20196700 | 1.07791600  |
| H                         | 1.79075400  | -4.14940600 | 0.31079200  | C                         | 5.09452000  | -0.33362100 | -0.42433600 |
| H                         | 1.73015500  | -5.55789400 | -0.32427800 | C                         | 6.21947200  | -2.43926600 | 1.02082900  |
| O                         | 5.40983600  | -2.57123800 | -0.27156900 | H                         | 4.21278600  | -2.84403800 | 1.68773700  |
| H                         | 4.44417300  | -2.66586000 | -0.16798100 | C                         | 6.47252800  | -0.56964300 | -0.48451300 |
| H                         | 5.53819300  | -1.60758900 | -0.27585200 | H                         | 4.64616600  | 0.48201700  | -0.98124800 |
| O                         | 5.03092700  | 0.37635000  | -0.59972100 | C                         | 7.04141200  | -1.62141900 | 0.23687900  |
| H                         | 5.09099900  | 0.43697500  | -1.56065300 | H                         | 6.64905800  | -3.26262100 | 1.58582500  |
| H                         | 4.09255600  | 0.12793900  | -0.41994400 | H                         | 7.10104700  | 0.07112100  | -1.09803000 |
|                           |             |             |             | H                         | 8.11160700  | -1.80464000 | 0.18986600  |
|                           |             |             |             | H                         | 1.84365100  | -0.05001800 | -1.24049300 |
|                           |             |             |             | O                         | -1.43161800 | -2.38251700 | 1.05580000  |
|                           |             |             |             | C                         | -0.81214400 | -1.57849800 | 0.31601200  |
|                           |             |             |             | O                         | -0.68156700 | -1.86514200 | -0.97864500 |
|                           |             |             |             | O                         | -0.29610000 | -0.49113100 | 0.78830800  |
|                           |             |             |             | H                         | -0.08880200 | -1.17064300 | -1.49698500 |
|                           |             |             |             | O                         | -1.59369900 | -1.32778800 | 3.64517200  |
|                           |             |             |             | H                         | -0.82766200 | -0.74231800 | 3.60698100  |
|                           |             |             |             | H                         | -1.58291200 | -1.75859600 | 2.76023800  |
|                           |             |             |             | O                         | -1.06829600 | -4.59393100 | -2.11170900 |
|                           |             |             |             | H                         | -0.91289300 | -3.65292200 | -1.91763400 |
|                           |             |             |             | H                         | -1.30907500 | -4.95060600 | -1.23775100 |
|                           |             |             |             | O                         | -2.38779700 | -4.81127800 | 0.42930100  |
|                           |             |             |             | H                         | -2.07797000 | -3.88787100 | 0.63622300  |
|                           |             |             |             | H                         | -2.29395800 | -5.30871700 | 1.24946100  |
|                           |             |             |             | O                         | -3.96959900 | -5.26207900 | -2.08849000 |
|                           |             |             |             | H                         | -3.79692200 | -5.13022600 | -1.14207000 |
|                           |             |             |             | H                         | -3.11440000 | -5.01841000 | -2.48351200 |
| <b>8</b>                  |             |             |             | <b>TS9-10</b>             |             |             |             |
| Charge=0 Multiplicity = 2 |             |             |             | Charge=0 Multiplicity = 2 |             |             |             |

|    |             |             |             |    |             |             |             |
|----|-------------|-------------|-------------|----|-------------|-------------|-------------|
| Cu | -0.42909700 | 0.81985700  | 0.36484400  | Cu | 0.39829300  | -1.26676700 | 0.13650400  |
| C  | 0.51970600  | 4.57900600  | -0.75074600 | C  | 1.38749300  | -4.70997100 | -1.74562700 |
| N  | -0.55886900 | 2.69146700  | -0.05585000 | N  | 0.26313900  | -2.98876700 | -0.75523400 |
| C  | -0.81965100 | 4.89555700  | -0.49017100 | C  | 0.01345500  | -4.96631200 | -1.82218500 |
| H  | 1.29858900  | 5.24747700  | -1.09336900 | H  | 2.19342700  | -5.32499800 | -2.12394000 |
| C  | -1.44593500 | 3.70507000  | -0.06583400 | C  | -0.64037400 | -3.88085900 | -1.20036100 |
| H  | -1.29638400 | 5.86053500  | -0.59533100 | H  | -0.46869300 | -5.82630500 | -2.26655800 |
| H  | -2.47945600 | 3.55204900  | 0.21741300  | H  | -1.70282600 | -3.72424900 | -1.06593000 |
| C  | 1.72759900  | 2.28381100  | -0.52064900 | C  | 2.60814100  | -2.65631300 | -0.71333000 |
| H  | 2.72673200  | 2.59571300  | -0.82693800 | H  | 3.63343800  | -2.96064000 | -0.92431500 |
| N  | 1.49259800  | 1.02673200  | -0.20916900 | N  | 2.36656100  | -1.52278900 | -0.08494500 |
| C  | 2.53577400  | 0.07445400  | -0.12918600 | C  | 3.41967700  | -0.63393000 | 0.24157200  |
| C  | 2.36204000  | -1.18835600 | -0.71780900 | C  | 3.43433000  | -0.01909800 | 1.50284000  |
| C  | 3.73501300  | 0.36618700  | 0.54386100  | C  | 4.44494800  | -0.34632800 | -0.67470700 |
| C  | 3.37805900  | -2.14004700 | -0.65664700 | C  | 4.46774200  | 0.84439700  | 1.85909700  |
| C  | 4.76056400  | -0.57823100 | 0.60267700  | C  | 5.48635600  | 0.51490800  | -0.32724600 |
| C  | 4.56004200  | -1.81379800 | -0.00114400 | C  | 5.47775400  | 1.09149900  | 0.93630600  |
| H  | 3.25238100  | -3.11877800 | -1.10596200 | H  | 4.49462600  | 1.32363300  | 2.83153700  |
| H  | 5.69135200  | -0.37257500 | 1.12005100  | H  | 6.28101700  | 0.75247600  | -1.02601300 |
| C  | 0.65914600  | 3.20434600  | -0.47191100 | C  | 1.51944400  | -3.47217100 | -1.08196500 |
| H  | 1.43788100  | -1.42864300 | -1.23156900 | H  | 2.63097600  | -0.21991200 | 2.20306600  |
| H  | 3.85631400  | 1.32362700  | 1.04125900  | H  | 4.41428900  | -0.77332900 | -1.67214400 |
| F  | 5.55392000  | -2.73918600 | 0.06231200  | F  | 6.48594500  | 1.93714100  | 1.27811100  |
| O  | -2.55964300 | -2.01793400 | 1.44021800  | O  | -0.74699000 | 2.72988100  | 0.34500500  |
| C  | -1.83148900 | -1.07208600 | 1.15534200  | C  | 0.24197700  | 1.99260000  | 0.33757400  |
| O  | -2.33593300 | 0.20928000  | 1.01108600  | O  | 1.40683100  | 2.27646300  | -0.19541300 |
| O  | -0.56296100 | -1.05164200 | 0.92887600  | O  | 0.22824800  | 0.78401300  | 0.90849600  |
| H  | -3.33347800 | 0.21942700  | 0.76561800  | H  | 1.39638400  | 3.16721800  | -0.68918900 |
| O  | -0.23746700 | -3.21290900 | -1.11457200 | C  | -2.33823600 | -1.55300800 | 1.37651700  |
| H  | -0.21746500 | -2.68708600 | -0.29825100 | H  | -2.17436100 | -1.40028900 | 2.45388200  |
| H  | -1.12747400 | -3.59734700 | -1.13641400 | O  | -1.40465900 | -0.80789700 | 0.61618200  |
| O  | -4.77410600 | 0.17602700  | 0.25034300  | H  | -0.77122900 | 0.30872100  | 0.97624700  |
| H  | -5.44055200 | 0.07050700  | 0.94113600  | H  | -2.18496100 | -2.62490200 | 1.18180500  |
| H  | -4.88279900 | -0.59684900 | -0.36663600 | C  | -3.76808500 | -1.17930500 | 1.02684000  |
| O  | -4.97415900 | -1.96543600 | -1.36658800 | C  | -4.76716800 | -1.19965600 | 2.00765600  |
| H  | -4.92795400 | -1.86270400 | -2.32453600 | C  | -4.11860100 | -0.84181000 | -0.28907000 |
| H  | -4.36463800 | -2.70142400 | -1.12397500 | C  | -6.09348100 | -0.89887400 | 1.68341500  |
| O  | -3.15357400 | -3.82615900 | -0.45433200 | H  | -4.50736000 | -1.44521900 | 3.03491900  |
| H  | -2.91521400 | -3.32699200 | 0.36344500  | C  | -5.44362300 | -0.53575600 | -0.61475700 |
| H  | -3.41786500 | -4.71282300 | -0.17904600 | H  | -3.34535800 | -0.81350600 | -1.05077800 |
|    |             |             |             | C  | -6.43594500 | -0.56456800 | 0.37110400  |
|    |             |             |             | H  | -6.85483300 | -0.91413300 | 2.45805600  |
|    |             |             |             | H  | -5.70084000 | -0.27688700 | -1.63828300 |
|    |             |             |             | H  | -7.46425200 | -0.32340000 | 0.11854300  |

|                           |                           |             |             |             |             |             |             |
|---------------------------|---------------------------|-------------|-------------|-------------|-------------|-------------|-------------|
|                           | O                         | 1.40344800  | 4.47365800  | -1.56545000 |             |             |             |
|                           | H                         | 2.07947200  | 5.14162300  | -1.40035500 |             |             |             |
|                           | H                         | 0.51247600  | 4.91855100  | -1.46223700 |             |             |             |
|                           | O                         | -0.97696000 | 5.33432400  | -0.87295000 |             |             |             |
|                           | H                         | -1.80941300 | 5.25125800  | -1.38827800 |             |             |             |
|                           | H                         | -1.01000000 | 4.58612000  | -0.25006300 |             |             |             |
|                           | O                         | -3.55136700 | 2.62950200  | -0.06921300 |             |             |             |
|                           | H                         | -3.93767000 | 1.74477800  | -0.12982600 |             |             |             |
|                           | H                         | -2.61603100 | 2.50566300  | 0.18315800  |             |             |             |
|                           | O                         | -3.47816000 | 4.66951800  | -1.92621100 |             |             |             |
|                           | H                         | -4.20815200 | 5.28039100  | -1.77068900 |             |             |             |
|                           | H                         | -3.62994800 | 3.90183000  | -1.32858900 |             |             |             |
| <b>11</b>                 | <b>TS12-13</b>            |             |             |             |             |             |             |
| Charge=0 Multiplicity = 2 | Charge=0 Multiplicity = 2 |             |             |             |             |             |             |
| Cu                        | 0.54344700                | -0.81565700 | -0.09123700 | Cu          | 0.07425400  | 1.03892300  | -0.12262400 |
| C                         | -1.13824900               | -4.47599200 | 0.13044300  | C           | -1.57311000 | 4.49275700  | 1.28209300  |
| N                         | 0.31901000                | -2.71726200 | 0.05660900  | N           | -0.13391300 | 2.85697700  | 0.58984200  |
| C                         | 0.16900100                | -4.97357300 | 0.16458200  | C           | -0.26135700 | 4.94660700  | 1.45145200  |
| H                         | -2.05878100               | -5.04431900 | 0.15313000  | H           | -2.48869400 | 5.02284000  | 1.51056000  |
| C                         | 1.03204300                | -3.85716900 | 0.11436100  | C           | 0.58915400  | 3.90527500  | 1.01055300  |
| H                         | 0.47437400                | -6.00963900 | 0.21728400  | H           | 0.05597200  | 5.90553200  | 1.83884100  |
| H                         | 2.11459000                | -3.84447700 | 0.11429900  | H           | 1.67112600  | 3.88990300  | 0.98268000  |
| C                         | -1.94110600               | -2.00508800 | 0.00590400  | C           | -2.40215800 | 2.21321500  | 0.34536700  |
| H                         | -3.01361700               | -2.19794700 | -0.00778900 | H           | -3.47404300 | 2.41135800  | 0.40209200  |
| N                         | -1.47081100               | -0.77565200 | -0.05606300 | N           | -1.96438200 | 1.04868900  | -0.08795900 |
| C                         | -2.29183300               | 0.37055900  | -0.04807400 | C           | -2.86503400 | 0.10505800  | -0.63450000 |
| C                         | -1.78643100               | 1.56027400  | -0.60174700 | C           | -2.77249600 | -1.24588200 | -0.25810000 |
| C                         | -3.58379000               | 0.37601100  | 0.51191200  | C           | -3.84226100 | 0.49104800  | -1.57011100 |
| C                         | -2.56377800               | 2.71664800  | -0.63586600 | C           | -3.65255300 | -2.18746500 | -0.79131700 |
| C                         | -4.36937000               | 1.52781100  | 0.47717700  | C           | -4.72891700 | -0.44594500 | -2.10567200 |
| C                         | -3.84641400               | 2.67709200  | -0.10274500 | C           | -4.61510200 | -1.76993100 | -1.70345600 |
| H                         | -2.18480400               | 3.63785900  | -1.06498000 | H           | -3.59933500 | -3.23096200 | -0.49974800 |
| H                         | -5.36439400               | 1.54424900  | 0.90857400  | H           | -5.48356700 | -0.16162600 | -2.83119700 |
| C                         | -1.02200300               | -3.07117500 | 0.06512000  | C           | -1.46847400 | 3.19004200  | 0.74460100  |
| H                         | -0.77356700               | 1.57097200  | -0.99226900 | H           | -2.03745800 | -1.55717600 | 0.47634700  |
| H                         | -3.97530900               | -0.51003100 | 1.00023000  | H           | -3.89259700 | 1.52476500  | -1.89844000 |
| F                         | -4.60805400               | 3.80334800  | -0.13170600 | F           | -5.47202400 | -2.69199300 | -2.22585600 |
| O                         | 1.52286600                | 0.66617100  | -0.33470600 | O           | 0.51020300  | -0.73910000 | -1.30654500 |
| H                         | 1.74305600                | 1.18605700  | 0.47372300  | H           | 0.10721700  | -0.79047800 | -2.18296800 |
| O                         | 5.62782100                | 1.61964100  | -0.81470900 | O           | 1.91489600  | 1.06884300  | -0.86434000 |
| H                         | 4.81939100                | 1.47800500  | -1.37131300 | C           | 3.10395800  | 1.12859800  | -0.08748800 |
| H                         | 6.26200300                | 2.10353700  | -1.35542400 | H           | 3.57070000  | 2.11079600  | -0.25804900 |
| O                         | 4.99612700                | 2.30620500  | 1.72645600  | H           | 2.87590700  | 1.05666100  | 0.98436700  |
| H                         | 5.51511100                | 1.73482400  | 2.30476900  | H           | 1.41155300  | -0.03696600 | -1.27897400 |

|   |            |            |             |   |             |             |             |
|---|------------|------------|-------------|---|-------------|-------------|-------------|
| H | 5.27140900 | 2.08690700 | 0.80112400  | C | 4.08336800  | 0.03260300  | -0.46436500 |
| O | 3.33271900 | 1.22132300 | -2.20055600 | C | 4.57411600  | -0.86029700 | 0.49741400  |
| H | 2.62111100 | 1.00216900 | -1.53471100 | C | 4.51636400  | -0.10576300 | -1.79276700 |
| H | 2.97528100 | 1.92687900 | -2.75212400 | C | 5.47926700  | -1.86842800 | 0.14533100  |
| O | 2.29406300 | 2.06548300 | 1.92558700  | H | 4.24835300  | -0.76403900 | 1.53056400  |
| H | 1.93458200 | 2.93604400 | 2.13192400  | C | 5.41520500  | -1.11228400 | -2.14925800 |
| H | 3.27748900 | 2.17027100 | 1.89797200  | H | 4.14064900  | 0.58106300  | -2.54645700 |
|   |            |            |             | C | 5.90026800  | -1.99832600 | -1.18021200 |
|   |            |            |             | H | 5.85478300  | -2.54784700 | 0.90588000  |
|   |            |            |             | H | 5.74274800  | -1.20400500 | -3.18124200 |
|   |            |            |             | H | 6.60317600  | -2.77907100 | -1.45674200 |
|   |            |            |             | O | 1.28756400  | -2.69793800 | 0.38314200  |
|   |            |            |             | H | 2.15307700  | -3.05199500 | 0.14487900  |
|   |            |            |             | H | 0.98042500  | -2.14866200 | -0.37984200 |
|   |            |            |             | O | 0.66611500  | -0.24327900 | 1.73902200  |
|   |            |            |             | H | -0.07799900 | -0.69881300 | 2.17548300  |
|   |            |            |             | H | 1.18560500  | -1.00038100 | 1.40975900  |
|   |            |            |             | O | -0.88018600 | -2.55495700 | 2.24118000  |
|   |            |            |             | H | -0.16951300 | -2.97935900 | 1.72947900  |
|   |            |            |             | H | -1.10902400 | -3.14660800 | 2.97960200  |
|   |            |            |             | O | -1.66094800 | -4.18664500 | 4.46597400  |
|   |            |            |             | H | -2.58447400 | -4.46874200 | 4.47328500  |
|   |            |            |             | H | -1.48425700 | -3.81735100 | 5.34059200  |

Table S6 relative corrections to Gibbs free energies for each reported structures

| <b>complexes</b>           | <b>sp(scrf)</b>                                                                         | <b>thermal</b>                                 | <b>D3-gep</b>                                                                           |
|----------------------------|-----------------------------------------------------------------------------------------|------------------------------------------------|-----------------------------------------------------------------------------------------|
|                            | <b>Total free energy in solution:<br/>- with all non electrostatic terms<br/>(a.u.)</b> | <b>Thermal correction to Gibbs Free Energy</b> | <b>The sum of the geometrical counterpoise correction and the dispersion correction</b> |
| <b>Catalyst Activation</b> |                                                                                         |                                                |                                                                                         |
| <b>path A</b>              |                                                                                         |                                                |                                                                                         |
| <b>0_-12</b>               | <b>-2538.116566</b>                                                                     | <b>0.135386</b>                                | <b>-0.004842236</b>                                                                     |
| <b>1_-12</b>               | <b>-2885.006889</b>                                                                     | <b>0.255229</b>                                | <b>0.004232776</b>                                                                      |
| <b>1-2_-12</b>             | <b>-2884.962112</b>                                                                     | <b>0.253738</b>                                | <b>-0.000972771</b>                                                                     |
| <b>2_-12</b>               | <b>-2884.995787</b>                                                                     | <b>0.256486</b>                                | <b>0.000994824</b>                                                                      |
| <b>path B</b>              |                                                                                         |                                                |                                                                                         |
| <b>0_-12</b>               | <b>-2538.116566</b>                                                                     | <b>0.135386</b>                                | <b>-0.004842236</b>                                                                     |
| <b>3_-12</b>               | <b>-2614.594409</b>                                                                     | <b>0.154079</b>                                | <b>0.00504409</b>                                                                       |

|                       |              |          |              |
|-----------------------|--------------|----------|--------------|
| 3-4_-12               | -2614.550474 | 0.154679 | 0.002885161  |
| 4_-12                 | -2614.583537 | 0.158161 | 0.004607887  |
| 5_-12                 | -2961.475652 | 0.278978 | 0.013785248  |
| 5-6_-12               | -2961.454455 | 0.276466 | 0.010328994  |
| 6_-12                 | -2961.469003 | 0.277853 | 0.008527404  |
| path C                |              |          |              |
| 8_02                  | -2538.563345 | 0.146084 | -0.001800681 |
| 9_02                  | -2885.461699 | 0.267813 | 0.002682467  |
| 9-10_02               | -2885.432869 | 0.264261 | 0.003721628  |
| 10_02                 | -2885.447364 | 0.264892 | 0.003971529  |
| path D                |              |          |              |
| 11_02                 | -2349.906803 | 0.136586 | -0.004878498 |
| 12_02                 | -2696.79806  | 0.257763 | 0.000509539  |
| 12-13_02              | -2696.787632 | 0.254664 | 0.001526502  |
| 13_02                 | -2696.793086 | 0.255778 | -0.001618948 |
| substrate oxidation   |              |          |              |
| 7_03                  | -3104.176095 | 0.47314  | 0.009540499  |
| 7_01                  | -3104.176069 | 0.473789 | 0.009533239  |
| 7-14_03               | -3104.130013 | 0.473019 | 0.010309462  |
| 14_03                 | -3104.154281 | 0.477972 | 0.01092878   |
| 14r_01                | -3104.193117 | 0.475203 | 0.008502831  |
| catalyst regeneration |              |          |              |
| 15_03                 | -2908.903492 | 0.376783 | 0.022646636  |
| 16_03                 | -2908.924627 | 0.380748 | 0.022147464  |
| 15_01                 | -2908.90005  | 0.378931 | 0.022605956  |
| 16_01u                | -2908.924598 | 0.381752 | 0.022147464  |
| 16_01r                | -2908.88812  | 0.384316 | 0.017039715  |
| 17_02                 | -2771.951481 | 0.259336 | -0.00146235  |
| 17-18_02              | -2771.938717 | 0.257397 | -0.00152605  |
| 18_02                 | -2771.942324 | 0.256282 | -0.000563843 |
| Water involvement     |              |          |              |
| <u>1H2O</u>           |              |          |              |
| path A                |              |          |              |
| 0_-12                 | -2614.594409 | 0.154079 | 0.00504409   |

|                    |              |          |             |
|--------------------|--------------|----------|-------------|
| 1-2_-12            | -2961.441563 | 0.272369 | 0.009078427 |
| path B             |              |          |             |
| 0_-12              | -2614.594409 | 0.154079 | 0.00504409  |
| 3-4_-12            | -2691.029813 | 0.173852 | 0.013116635 |
| 5-6_-12            | -3037.933672 | 0.295817 | 0.020003673 |
| path C             |              |          |             |
| 8_02               | -2615.039909 | 0.165148 | 0.007508517 |
| 9-10_02            | -2961.909861 | 0.284829 | 0.015321688 |
| path D             |              |          |             |
| 11_02              | -2426.381925 | 0.158663 | 0.002823606 |
| 12-13_02           | -2773.264825 | 0.273293 | 0.010430454 |
| <b><u>2H2O</u></b> |              |          |             |
| path A             |              |          |             |
| 0_-12              | -2691.07082  | 0.175003 | 0.01539013  |
| 1-2_-12            | -3037.923381 | 0.29373  | 0.020353624 |
| path B             |              |          |             |
| 0_-12              | -2691.07082  | 0.175003 | 0.01539013  |
| 3-4_-12            | -2767.508193 | 0.192786 | 0.023353798 |
| 5-6_-12            | -3114.412138 | 0.316201 | 0.031131355 |
| path C             |              |          |             |
| 8_02               | -2691.518007 | 0.187725 | 0.019314805 |
| 9-10_02            | -3038.391266 | 0.307446 | 0.026737189 |
| path D             |              |          |             |
| 11_02              | -2502.858827 | 0.177265 | 0.016099058 |
| 12-13_02           | -2849.73675  | 0.299942 | 0.017086163 |
| <b><u>3H2O</u></b> |              |          |             |
| path A             |              |          |             |
| 0_-12              | -2767.551365 | 0.198129 | 0.027269662 |
| 1-2_-12            | -3114.402102 | 0.310542 | 0.030240604 |
| path B             |              |          |             |
| 0_-12              | -2767.551365 | 0.198129 | 0.027269662 |
| 5-6_-12            | -3190.891959 | 0.33681  | 0.042280462 |
| path C             |              |          |             |
| 8_02               | -2767.99975  | 0.208825 | 0.030727036 |



|             |              |          |             |
|-------------|--------------|----------|-------------|
| 9-10_02     | -3114.868203 | 0.327223 | 0.036325078 |
| path D      |              |          |             |
| 11_02       | -2579.340463 | 0.198383 | 0.026942963 |
| 12-13_02    | -2926.209768 | 0.322368 | 0.027764395 |
| <u>4H2O</u> |              |          |             |
| path A      |              |          |             |
| 0_-12       | -2844.032572 | 0.21888  | 0.036763446 |
| path B      |              |          |             |
| 0_-12       | -2844.032572 | 0.21888  | 0.036763446 |
| 5-6_-12     | -3267.367672 | 0.356629 | 0.053954963 |
| path C      |              |          |             |
| 8_02        | -2844.478758 | 0.233279 | 0.042611388 |
| 9-10_02     | -3191.348066 | 0.352677 | 0.049499795 |
| path D      |              |          |             |
| 11_02       | -2655.819389 | 0.21889  | 0.037416913 |
| 12-13_02    | -3002.685239 | 0.335963 | 0.039059873 |
